# Supplementary material for: Carborane-containing stereoregular cyclic phenylsiloxanes: synthesis, structure and properties
Source: Royal Society of Chemistry journal article supplement (doi:10.1039/d4nj01175a), 2024-01-01
Supplement: d4nj01175a1.pdf [file d4nj01175a1.pdf]

## Supplementary information

### Carborane-containing stereoregular cyclic phenylsiloxanes: synthesis, structure and properties

Minyaylo E.O.,<sup>a,b\*</sup> Kudryavtseva A.I.,<sup>c</sup> Anisimov A.A.,<sup>a,b,c,\*\*</sup> Zaitsev A.V.,<sup>a</sup> Khanin D.A.,<sup>a</sup> Ol'shevskaya V.A.,<sup>a</sup> Buzin M.I.,<sup>a</sup> Peregudov A.S.,<sup>a</sup>  
Shchegolikhina O.I.,<sup>a</sup> Muzafarov A.M.<sup>a,d</sup>

<sup>a</sup>*A. N. Nesmeyanov Institute of Organoelement Compounds, Russian Academy of Sciences, 119991 Moscow, Russia*

<sup>b</sup>*Tula State Lev Tolstoy Pedagogical University, 300026 Tula, Russia*

<sup>c</sup>*Moscow Institute of Physics and Technology (National Research University), 141701 Dolgoprudny, Moscow oblast, Russia*

<sup>d</sup>*Enikolopov Institute of Synthetic Polymeric Materials of the Russian Academy of Sciences, 117393 Moscow, Russia*

E-mail: \*[ekaminyaylo1995@mail.ru](mailto:ekaminyaylo1995@mail.ru)

\*\*[anisimov.ineos@gmail.com](mailto:anisimov.ineos@gmail.com)

### Table of contents

|                                                                |    |
|----------------------------------------------------------------|----|
| Synthesis data .....                                           | 2  |
| NMR spectra.....                                               | 3  |
| <sup>1</sup> H NMR spectra of initial hydride macrocycles..... | 3  |
| NMR spectra of carborane-containing phenylcyclsiloxanes.....   | 8  |
| IR spectra .....                                               | 28 |
| GPC data.....                                                  | 33 |
| TGA data .....                                                 | 34 |
| Mass spectra .....                                             | 37 |

## Synthesis data

Table S1.

| compound        | hydride cycle        |      |      | carborane |      | toluene | catalyst | reaction time,<br>h | yield after prep.<br>purification |    |
|-----------------|----------------------|------|------|-----------|------|---------|----------|---------------------|-----------------------------------|----|
|                 | Ph <sub>x</sub> SiH  | gram | mmol | gram      | mmol | mL      | μL       |                     | gram                              | %  |
| <b>cycle 4</b>  | Ph <sub>4</sub> SiH  | 0.96 | 1.2  | 1.1       | 5.8  | 20      | 10       | 8                   | 1.51                              | 82 |
| <b>cycle 5</b>  | Ph <sub>5</sub> SiH  | 0.69 | 0.7  | 0.8       | 4.2  | 15      | 10       | 10                  | 1.05                              | 79 |
| <b>cycle 6</b>  | Ph <sub>6</sub> SiH  | 0.94 | 0.8  | 1.07      | 5.7  | 20      | 10       | 12                  | 1.45                              | 80 |
| <b>cycle 8</b>  | Ph <sub>8</sub> SiH  | 1.00 | 0.6  | 1.13      | 6.1  | 21      | 10       | 16                  | 1.41                              | 75 |
| <b>cycle 12</b> | Ph <sub>12</sub> SiH | 0.92 | 0.4  | 1.3       | 7.0  | 22      | 10       | 24                  | 1.28                              | 71 |

## NMR spectra

### $^1\text{H}$ NMR spectra of initial hydride macrocycles

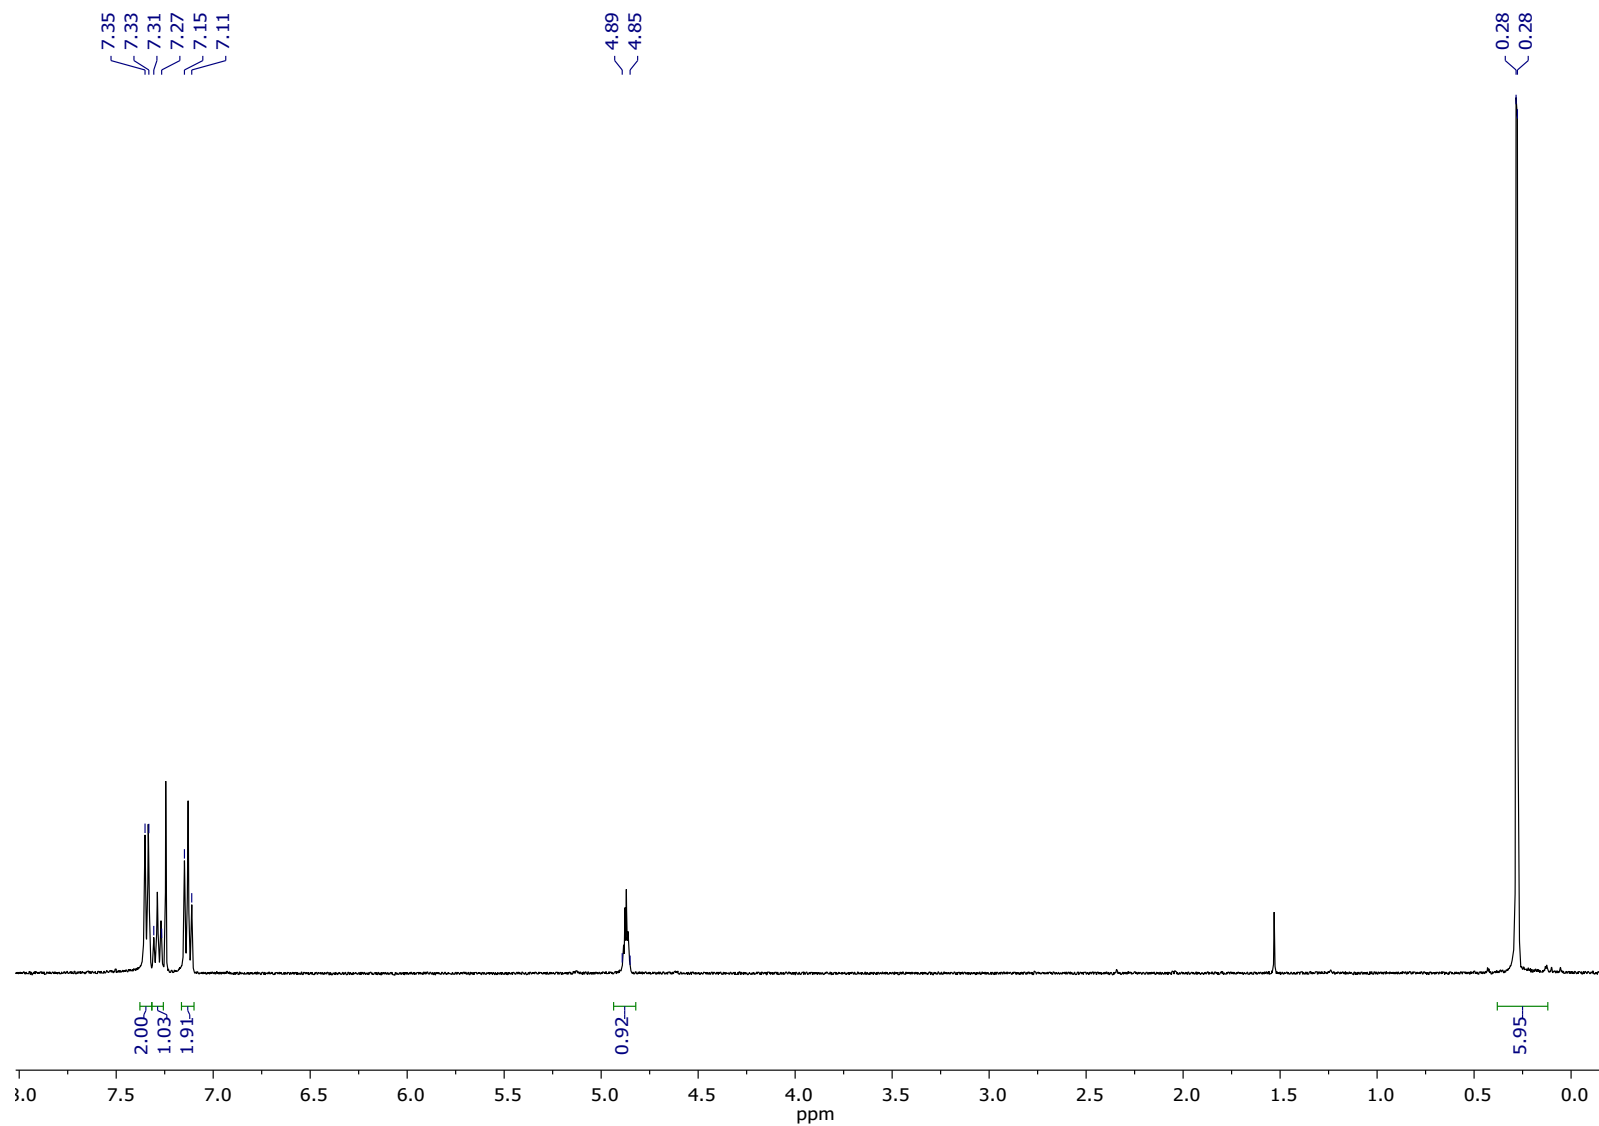

Fig S1.  $^1\text{H}$  NMR (CDCl<sub>3</sub>) spectrum of *cis*-tetra[(dimethylsiloxy)phenyl]cyclotetrasiloxane (*cis*-[(Ph)(OSiMe<sub>2</sub>H)O]<sub>4</sub>)

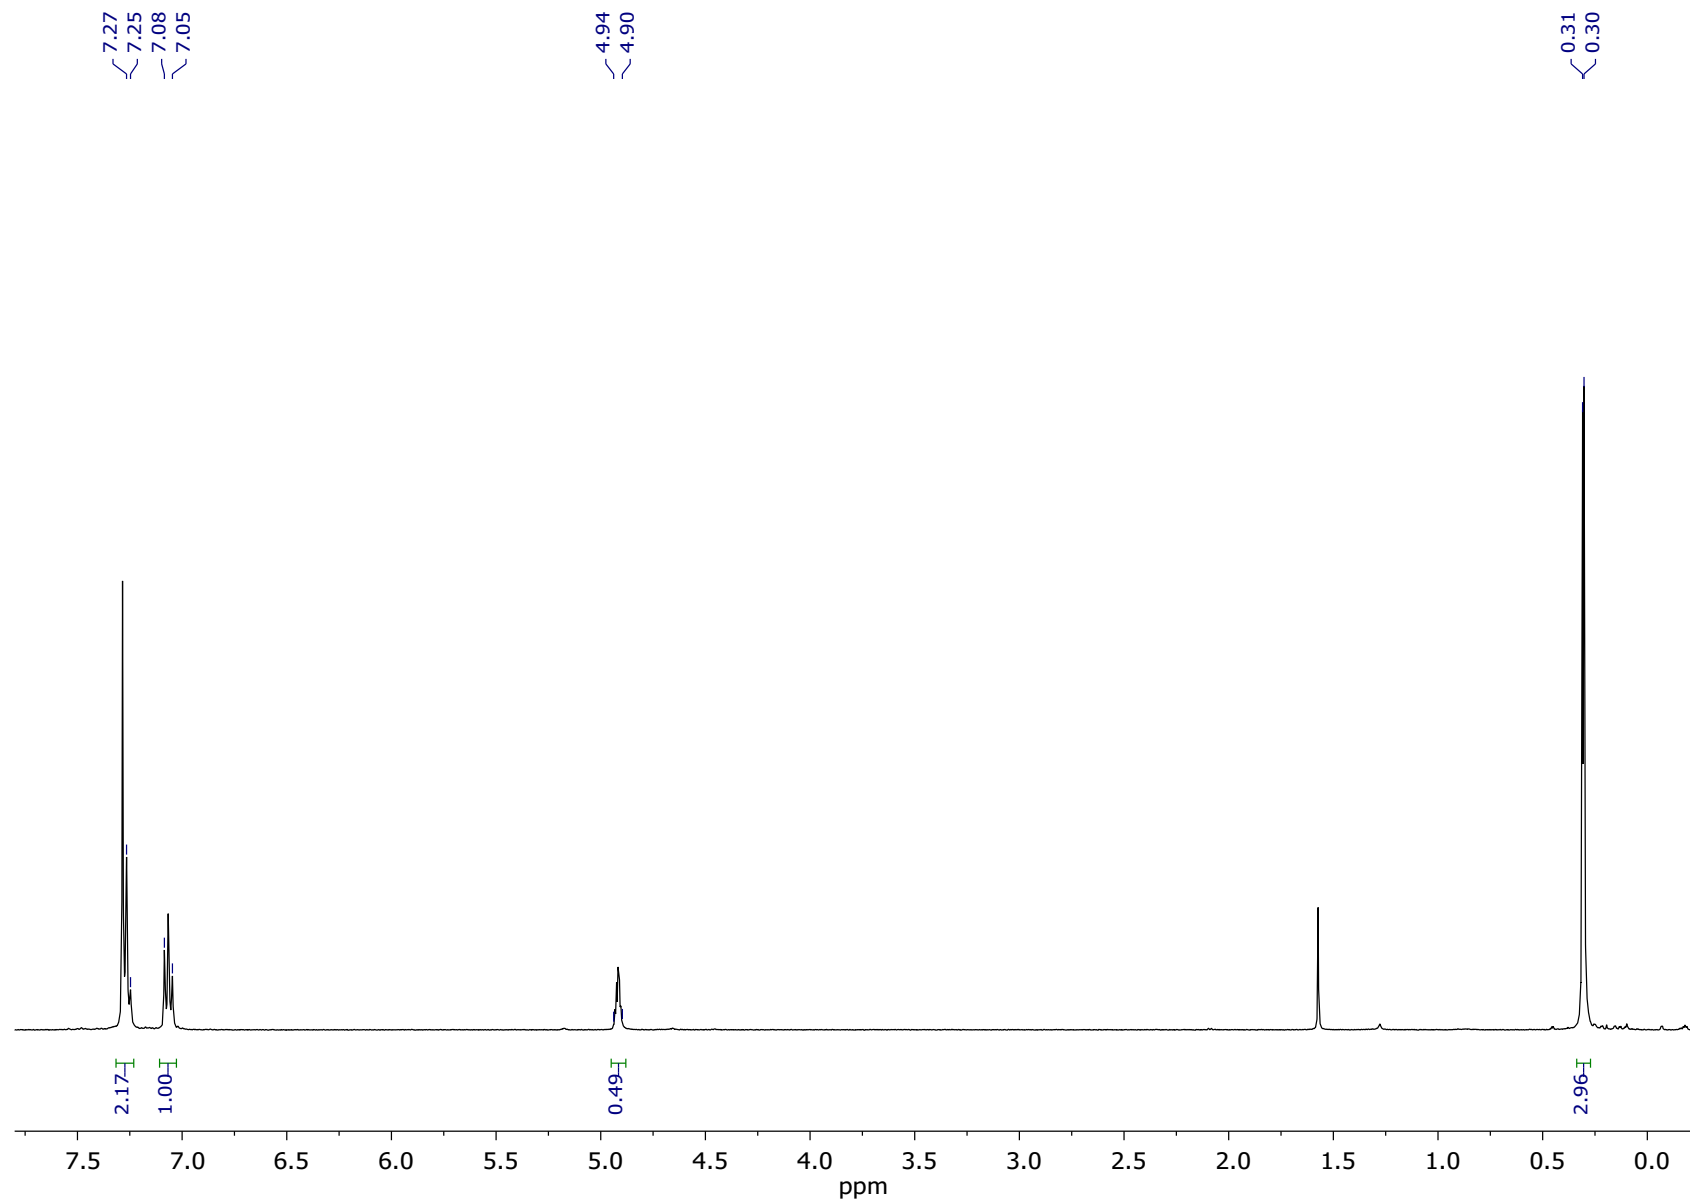

Fig S2.  $^1\text{H}$  NMR ( $\text{CDCl}_3$ ) spectrum of *cis*-penta[(dimethylsiloxy)phenyl]cyclopentasiloxane (*cis*-[(Ph)(OSiMe<sub>2</sub>H)O]<sub>5</sub>)

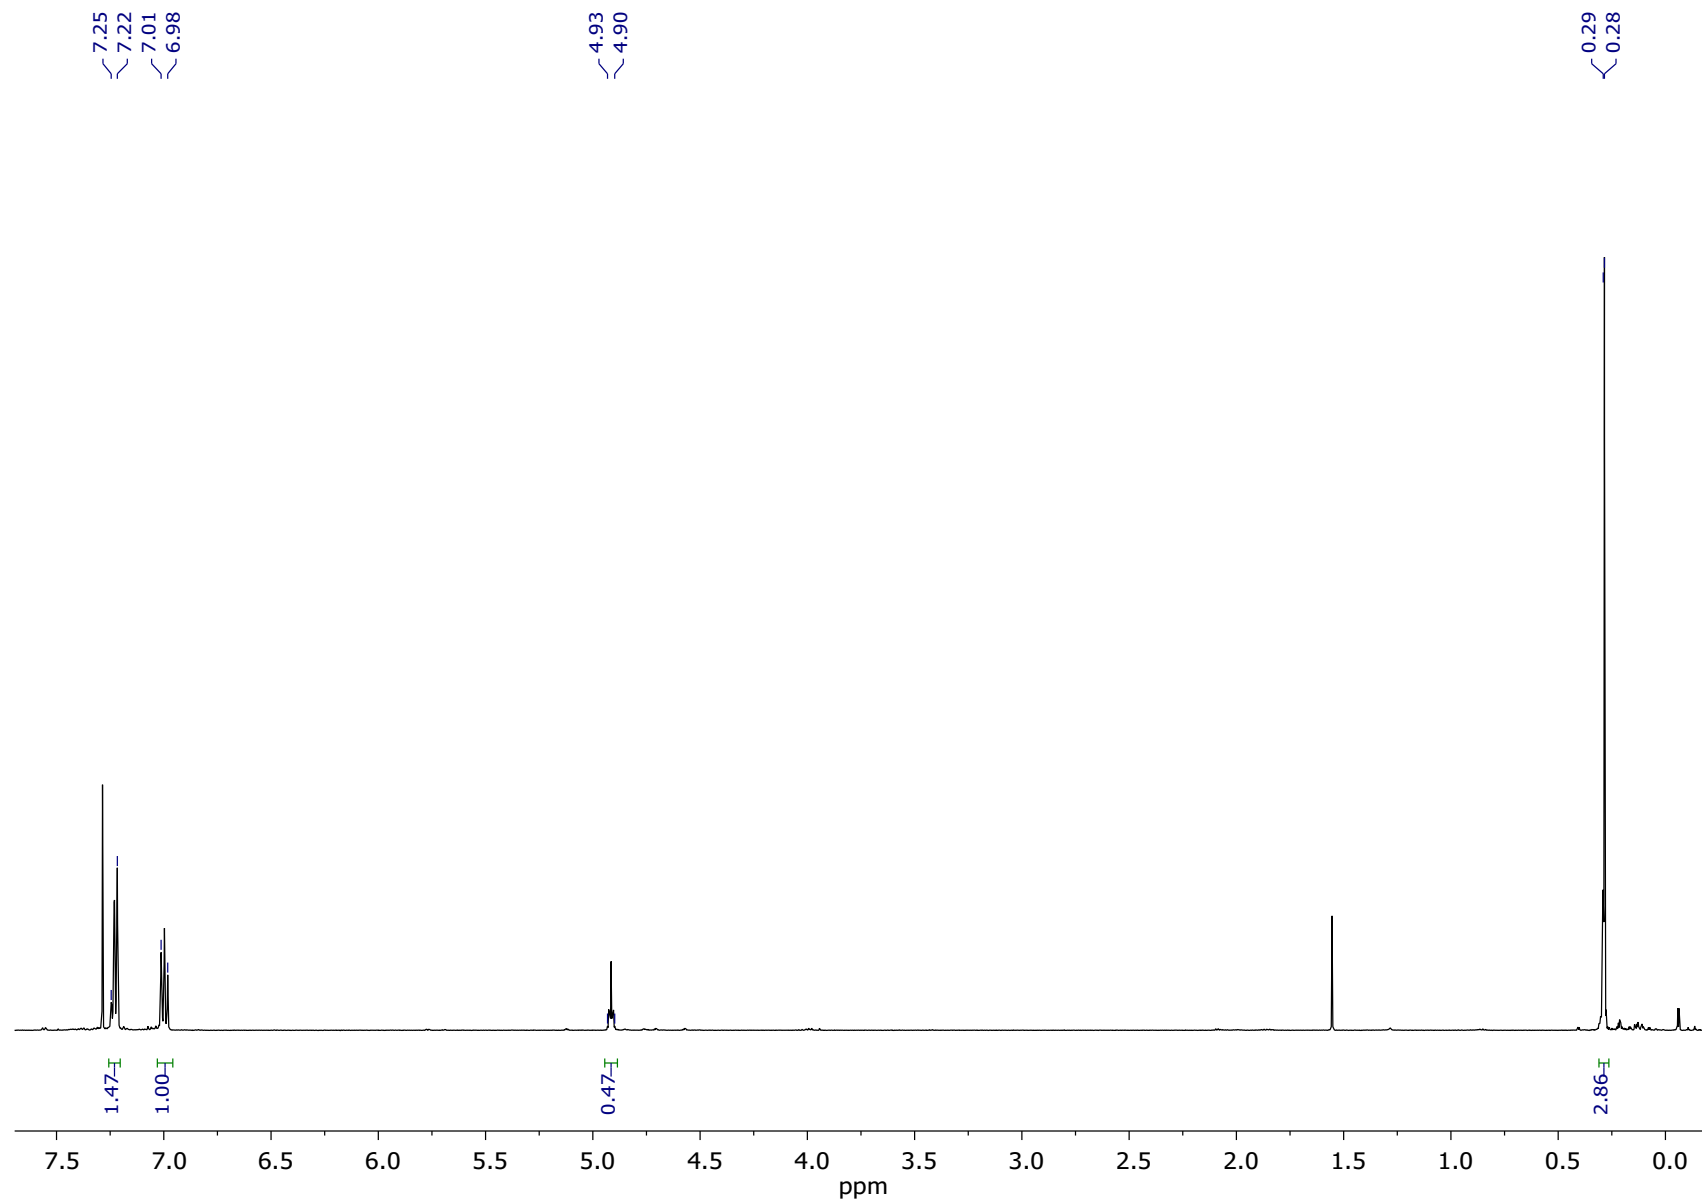

Fig S3.  $^1\text{H}$  NMR ( $\text{CDCl}_3$ ) spectrum of *cis*-hexa[(dimethylsiloxy)phenyl]cyclohexasiloxane (*cis*-[(Ph)(OSiMe<sub>2</sub>H)O]<sub>6</sub>)

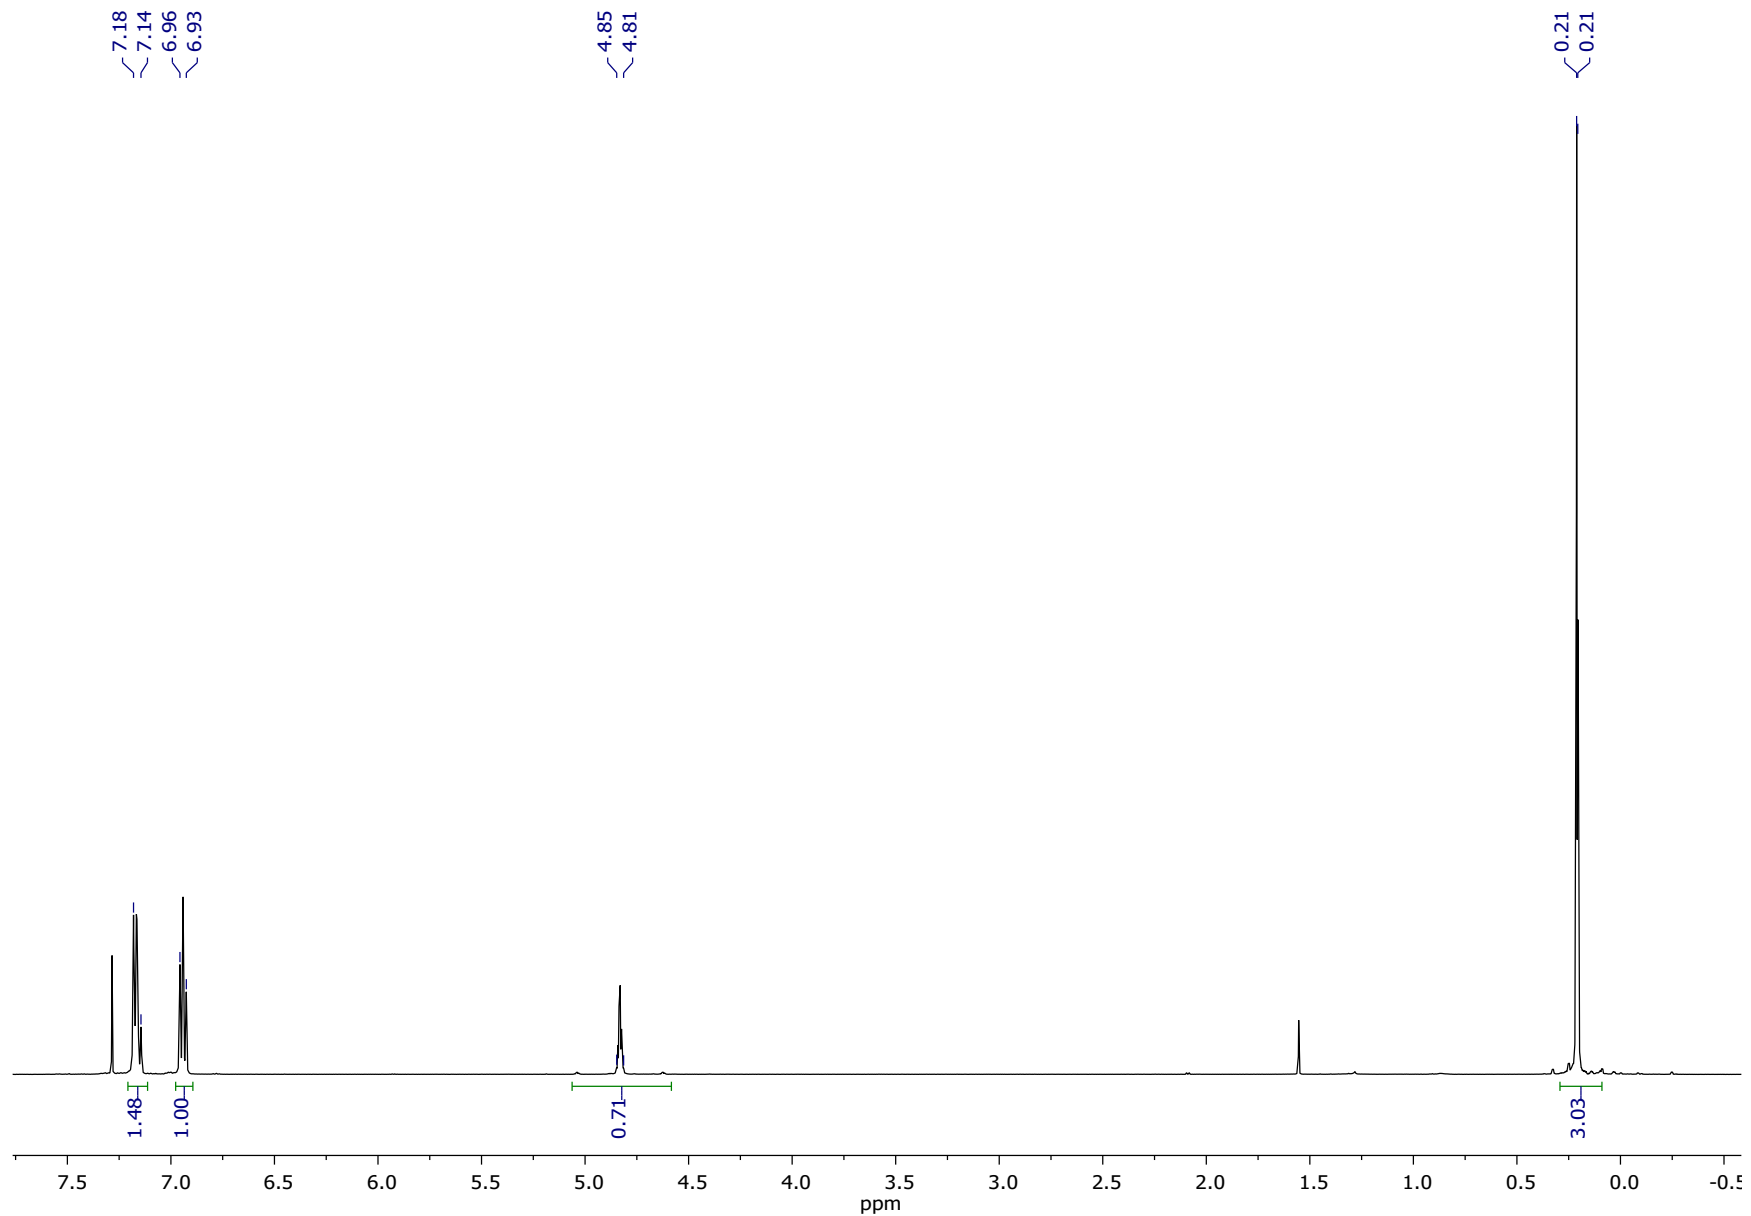

Fig S4.  $^1\text{H}$  NMR ( $\text{CDCl}_3$ ) spectrum of *cis*-octa[(dimethylsiloxy)phenyl]cyclooctasiloxane (*cis*-[(Ph)(OSiMe<sub>2</sub>H)O]<sub>8</sub>)

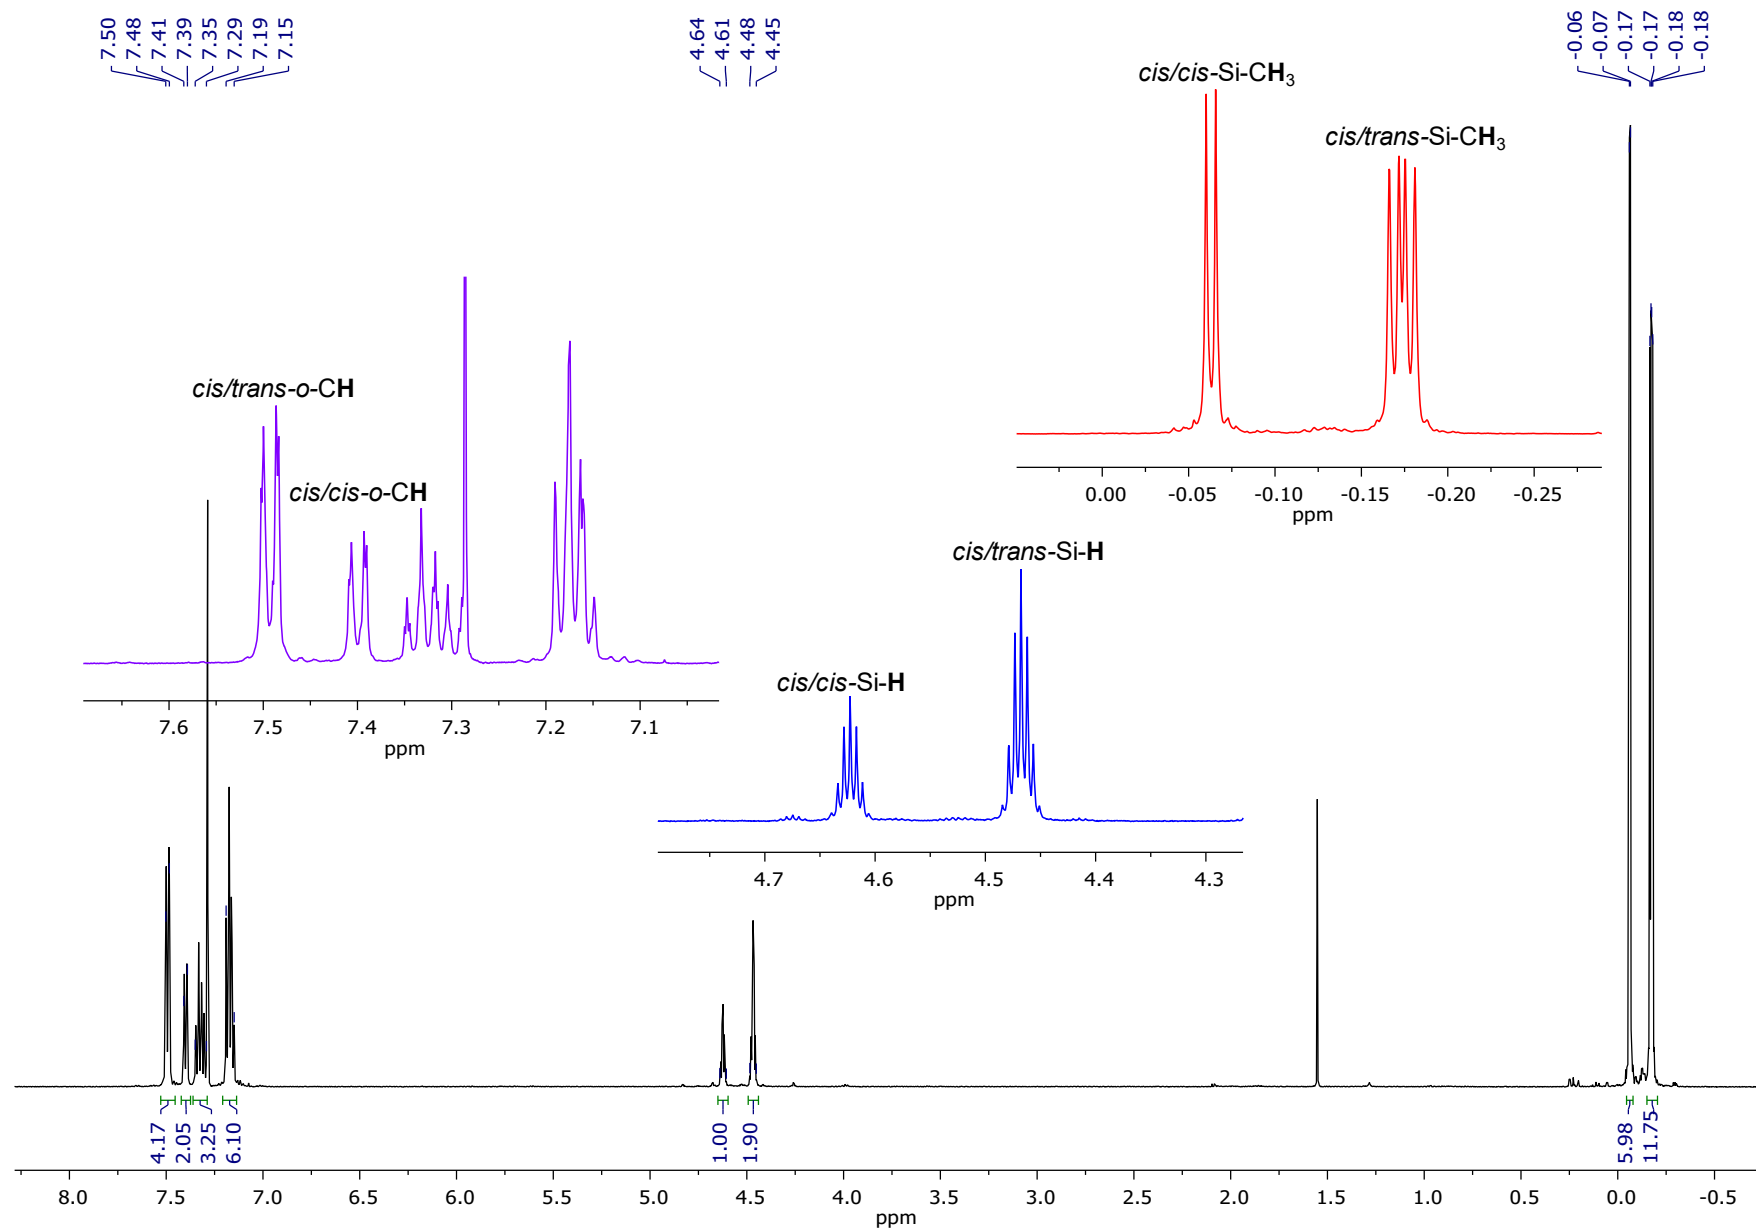

Fig S5.  $^1\text{H}$  NMR ( $\text{CDCl}_3$ ) spectrum of tris-*cis*-tris-*trans*-dodeca[(dimethylsiloxy)phenyl]cyclododecasiloxane (tris-*cis*-tris-*trans*-[(Ph)(OSiMe<sub>2</sub>H)O]<sub>12</sub>)

# NMR spectra of carborane-containing phenylcyclsiloxanes

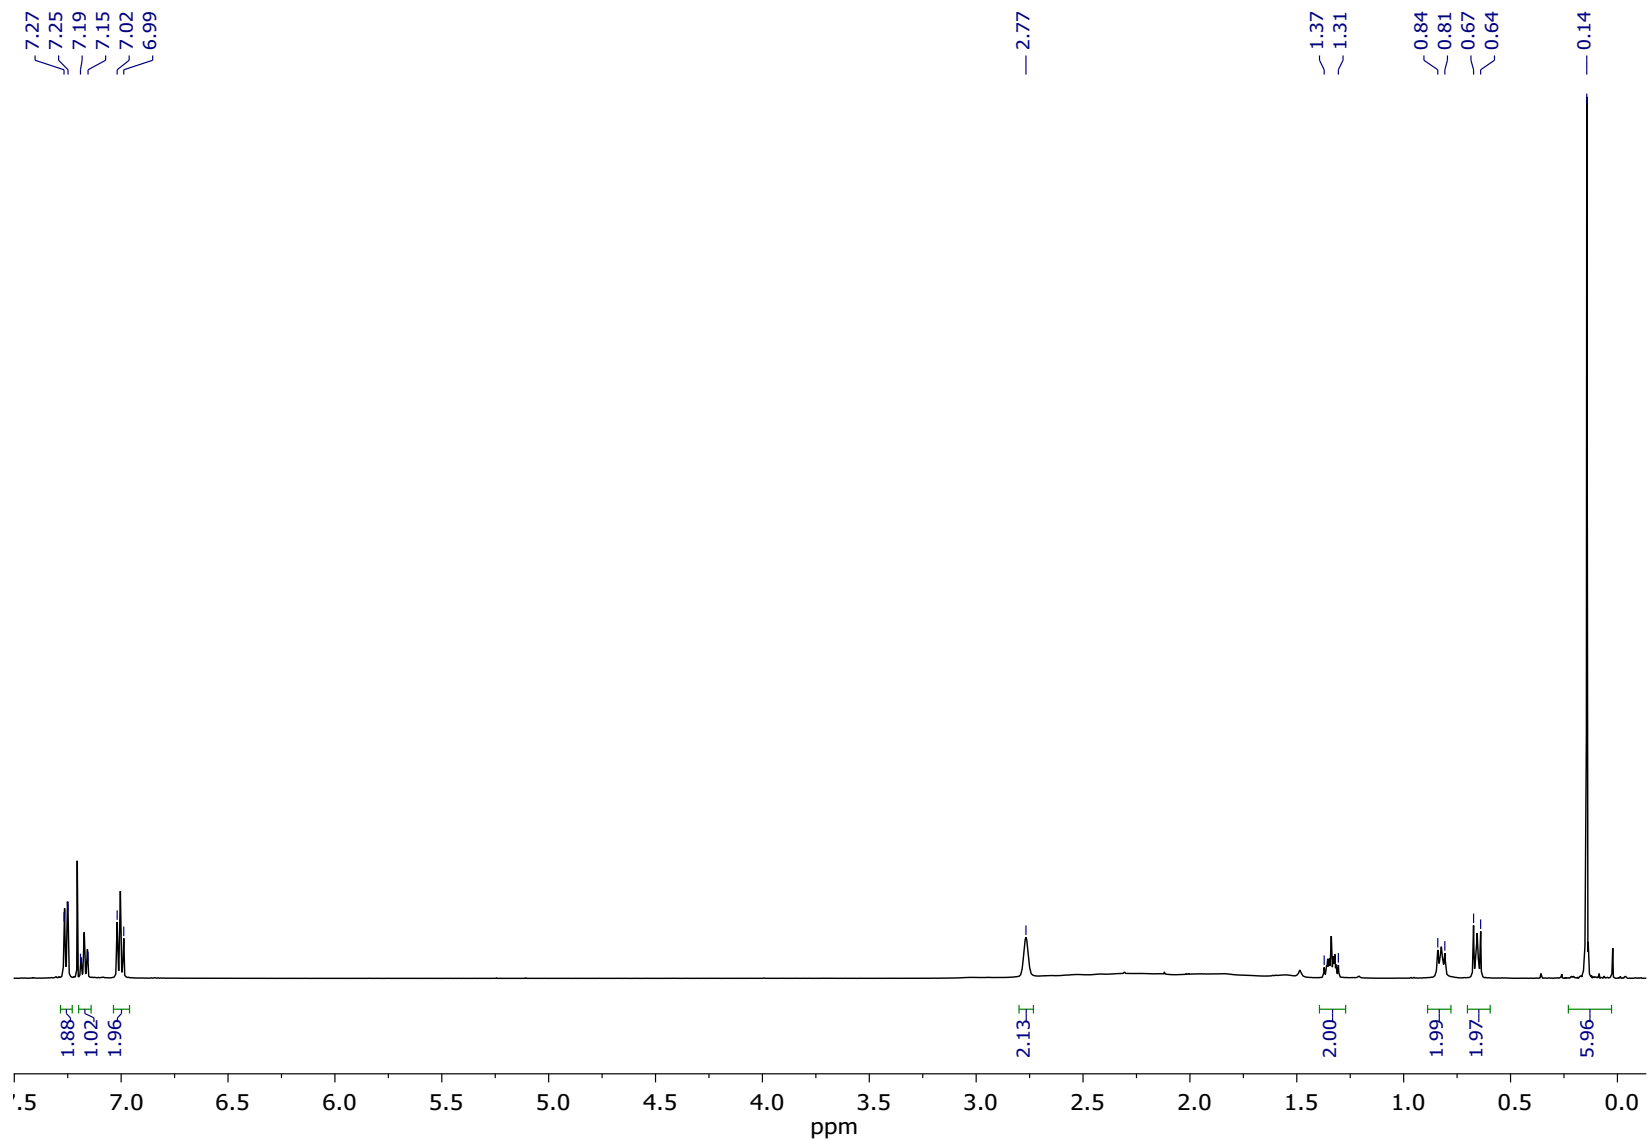

Fig S6. <sup>1</sup>H NMR (CDCl<sub>3</sub>) spectrum of *cis*-tetra[phenyl(1(3-(9-*m*-carboranyl)propyl)dimethylsiloxy)]cyclotetrasiloxane (cycle 4)



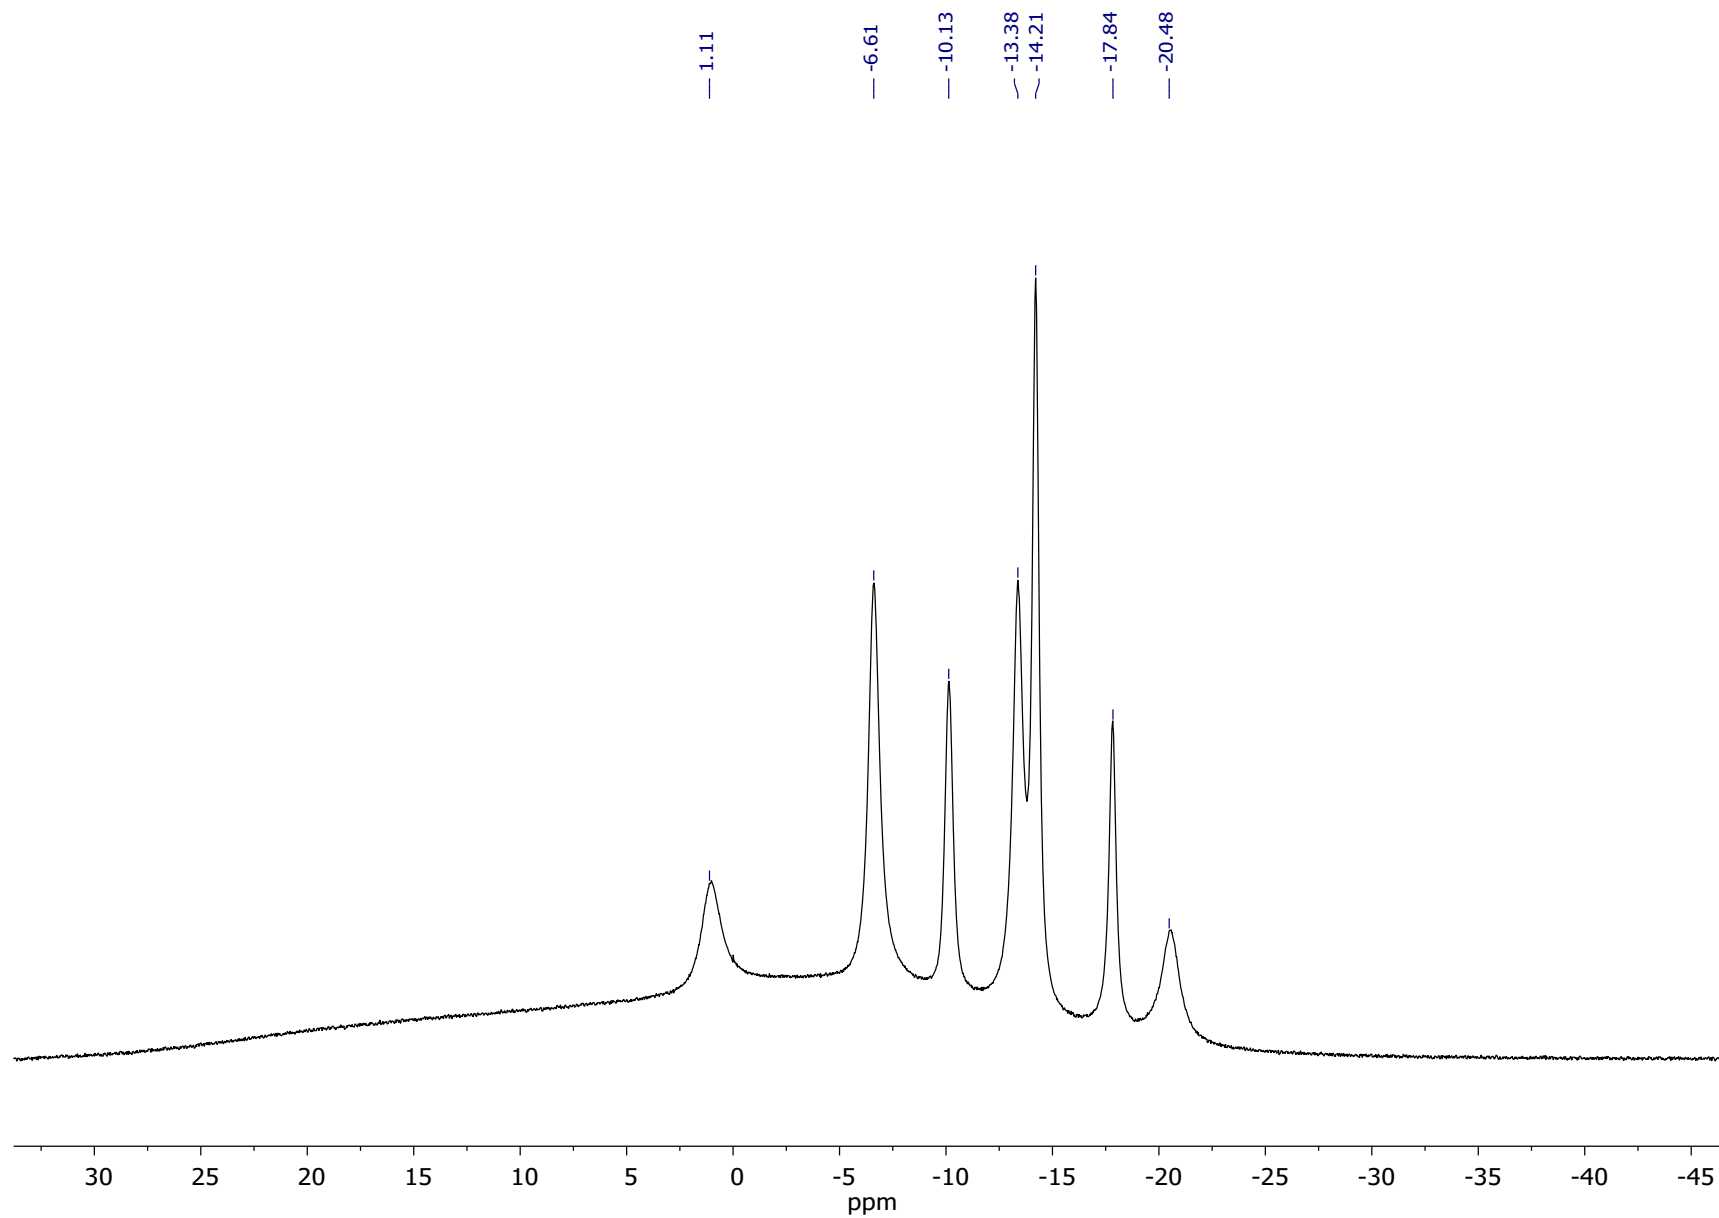

Fig S7.  $^{11}\text{B}$  NMR ( $\text{CDCl}_3$ ) spectrum of *cis*-tetra[phenyl(1(3-(9-*m*-carboranyl)propyl)dimethylsiloxy)]cyclotetrasiloxane (cycle 4)

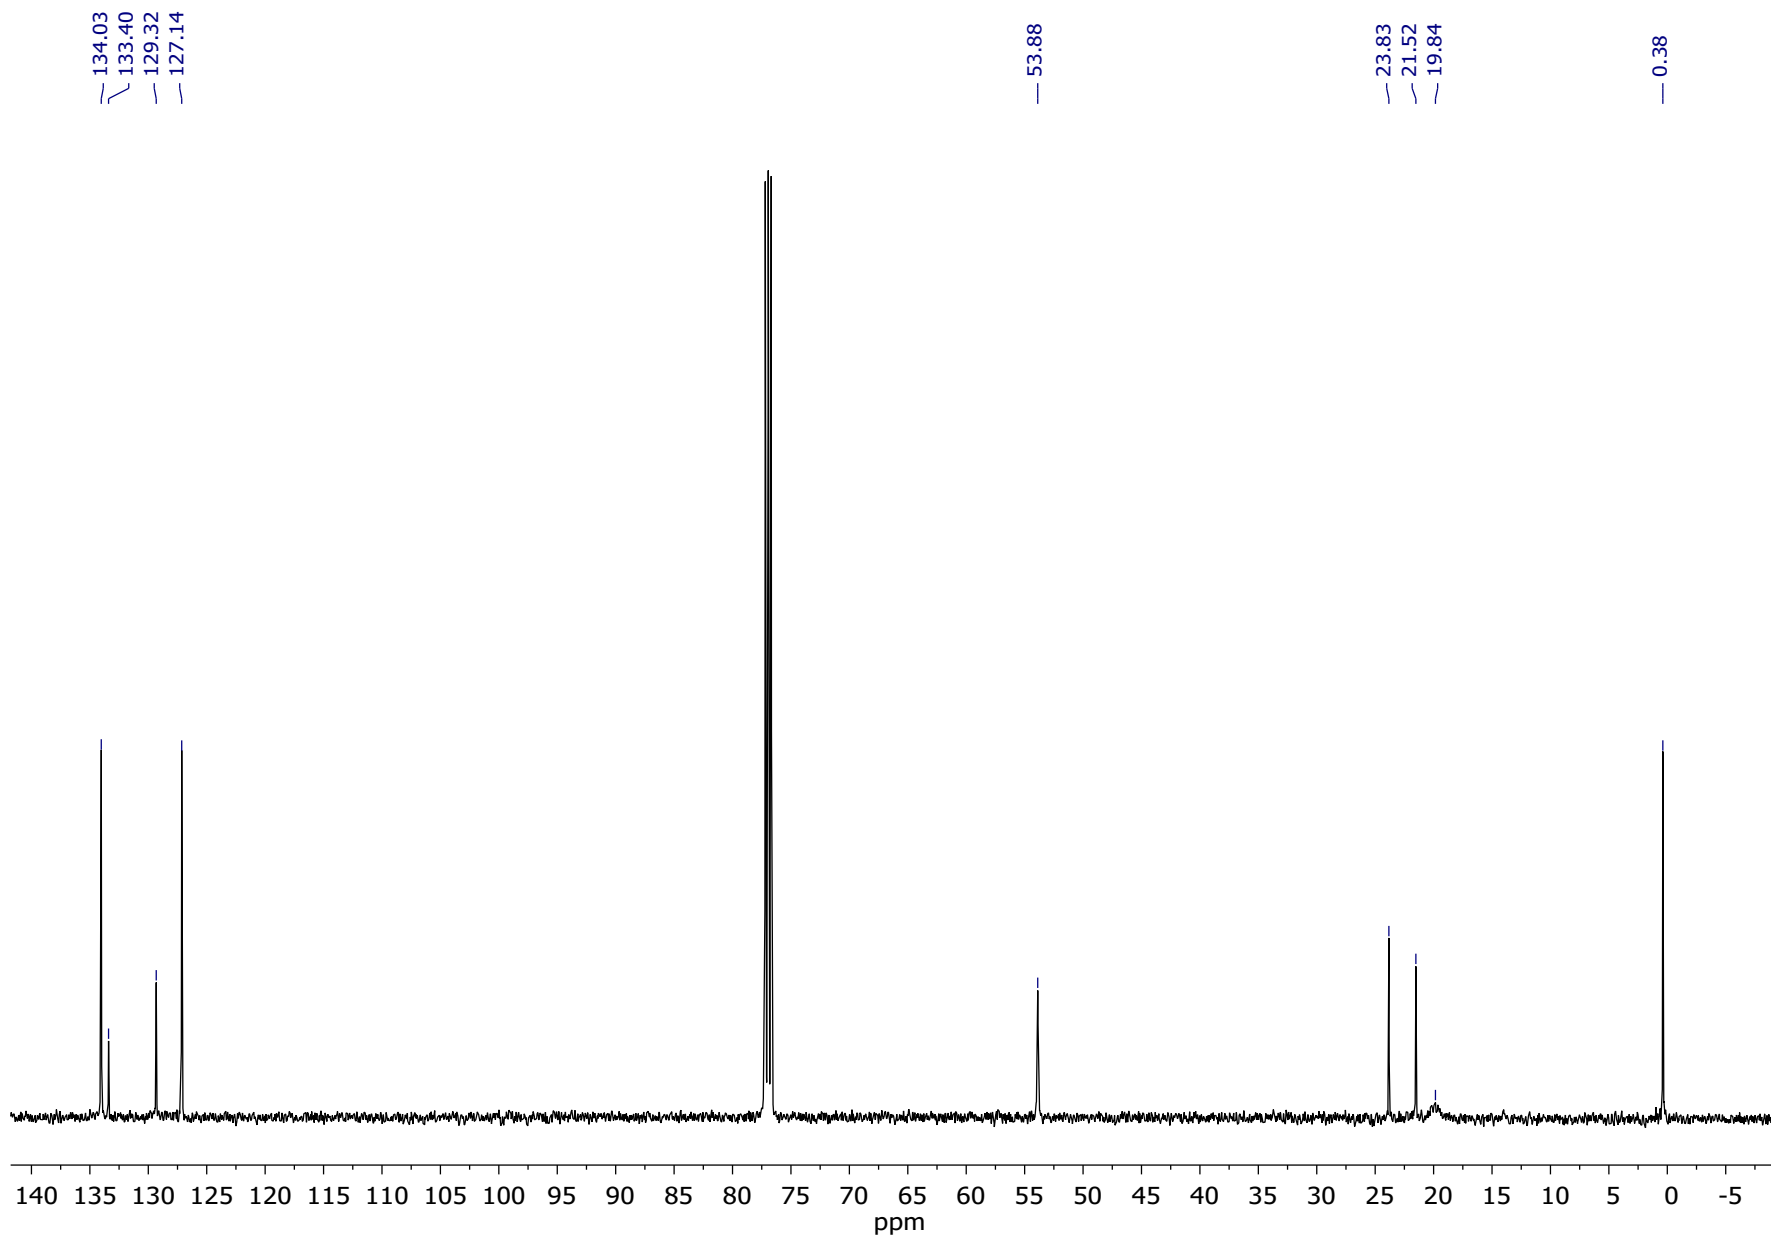

Fig S8.  $^{13}\text{C}$  NMR ( $\text{CDCl}_3$ ) spectrum of *cis*-tetra[phenyl(1(3-(9-*m*-carboranyl)propyl)dimethylsiloxy)]cyclotetrasiloxane (cycle 4)

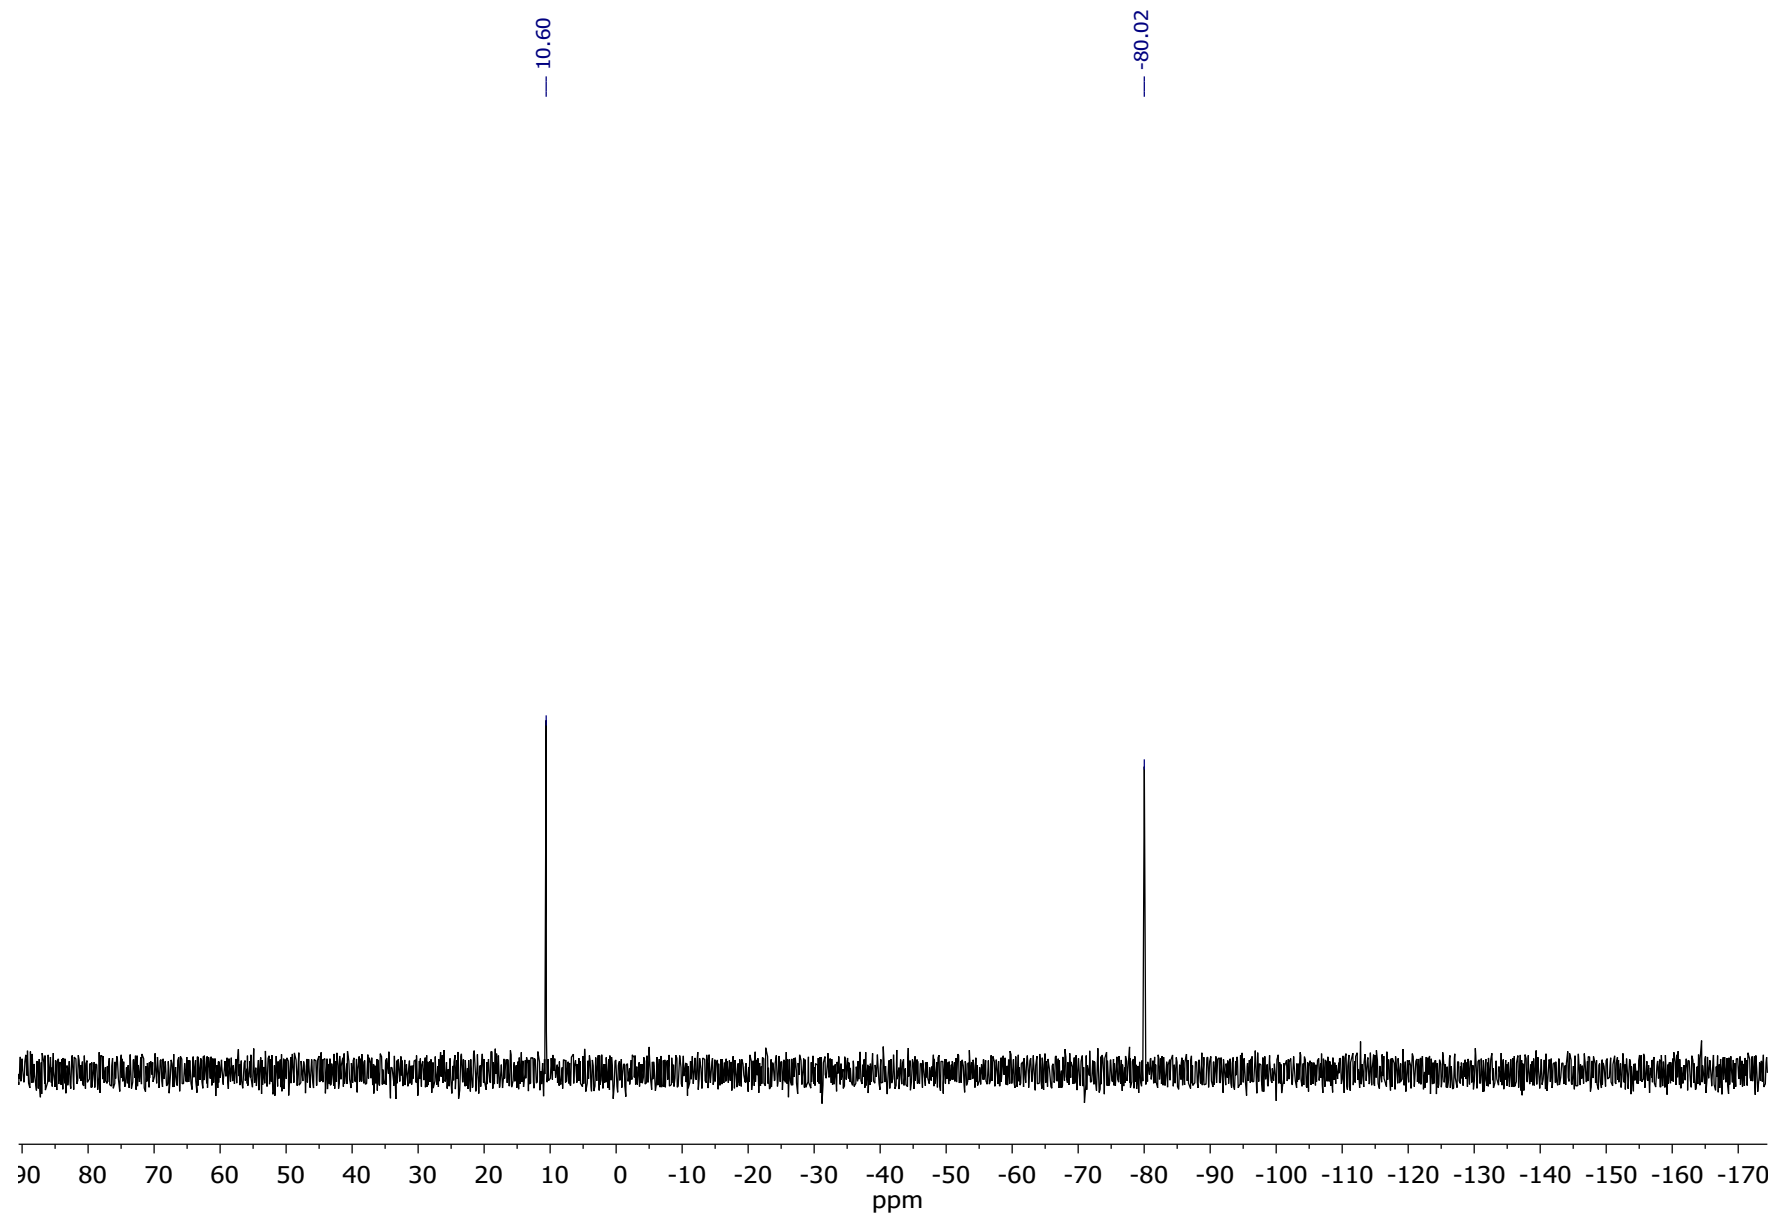

Fig S9.  $^{29}\text{Si}$  NMR ( $\text{CDCl}_3$ ) spectrum of *cis*-tetra[phenyl(1(3-(9-*m*-carboranyl)propyl)dimethylsiloxy)]cyclotetrasiloxane (cycle 4)

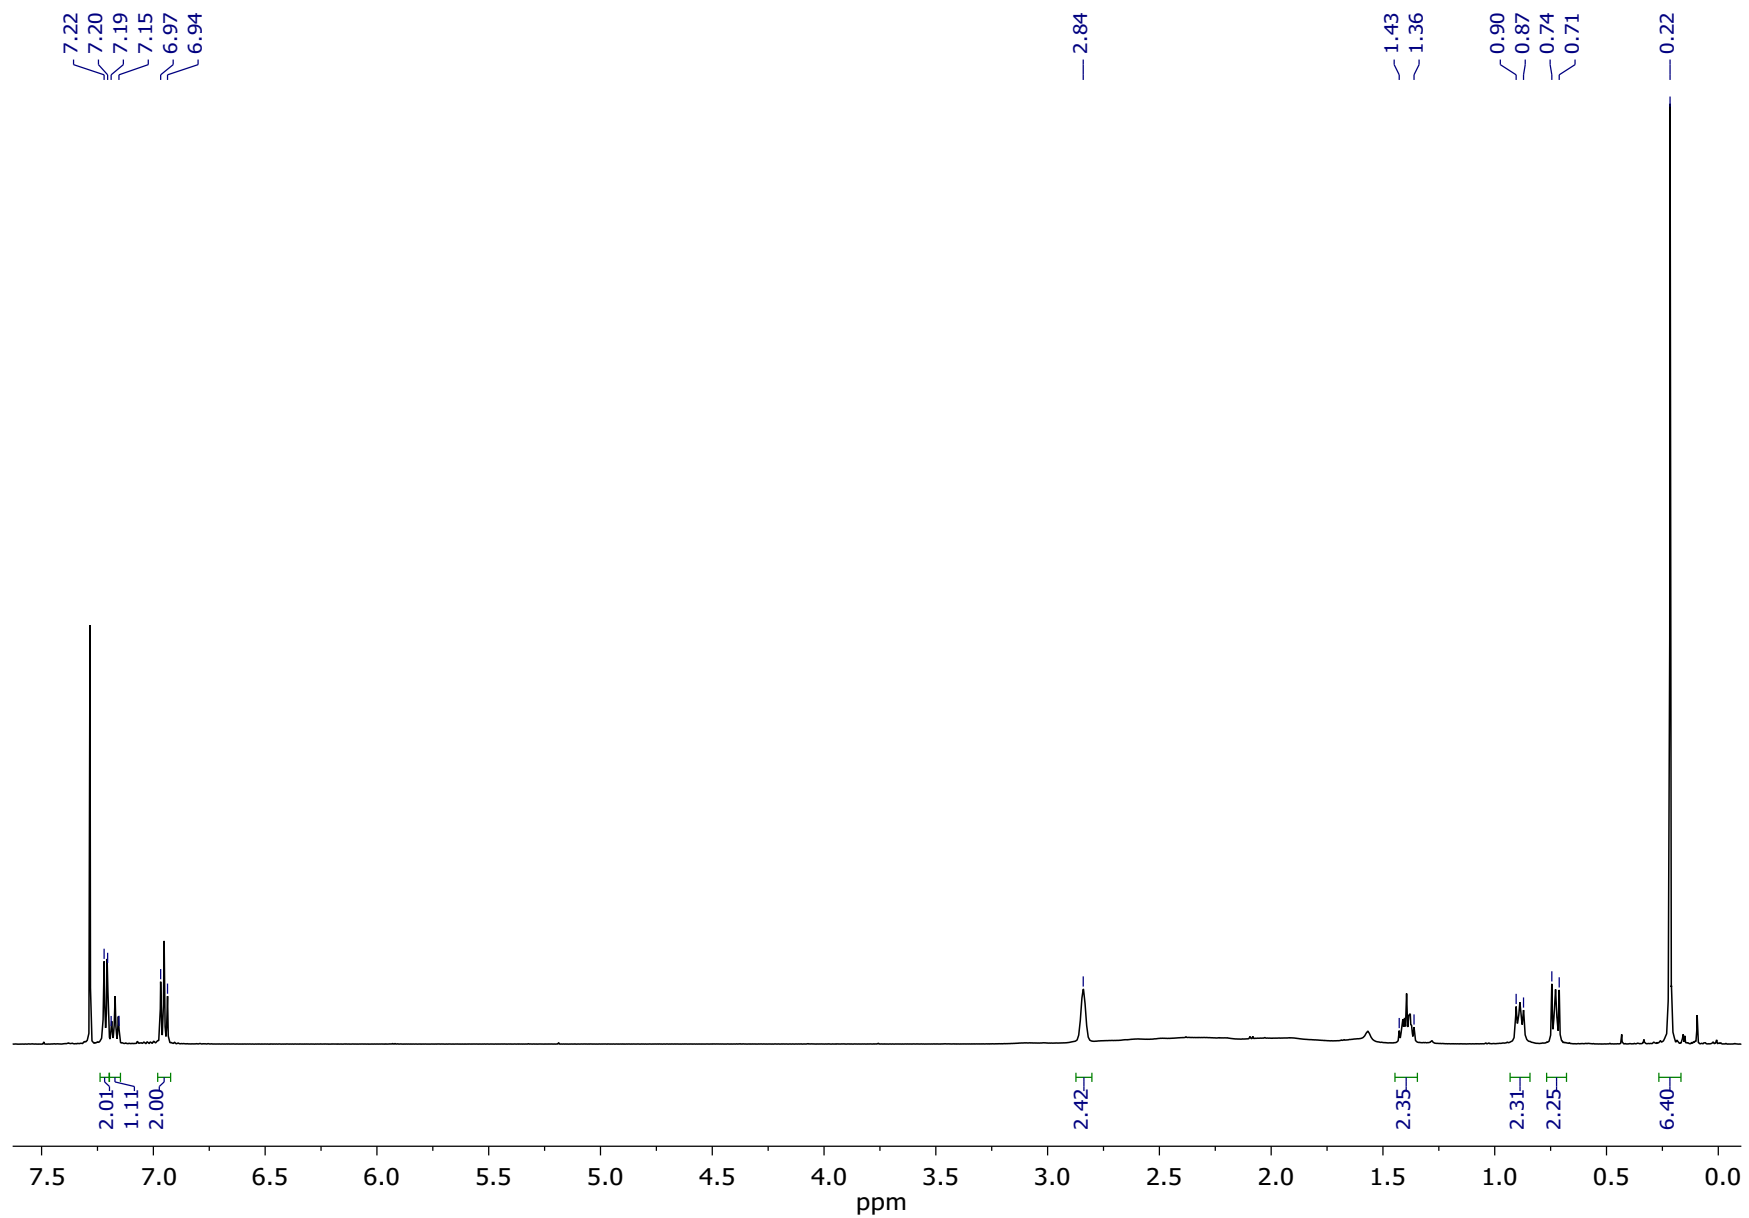

Fig S10.  $^1\text{H}$  NMR ( $\text{CDCl}_3$ ) spectrum of *cis*-penta[phenyl(1(3-(9-*m*-carboranyl)propyl)dimethylsiloxy)]cyclopentasiloxane (cycle 5)

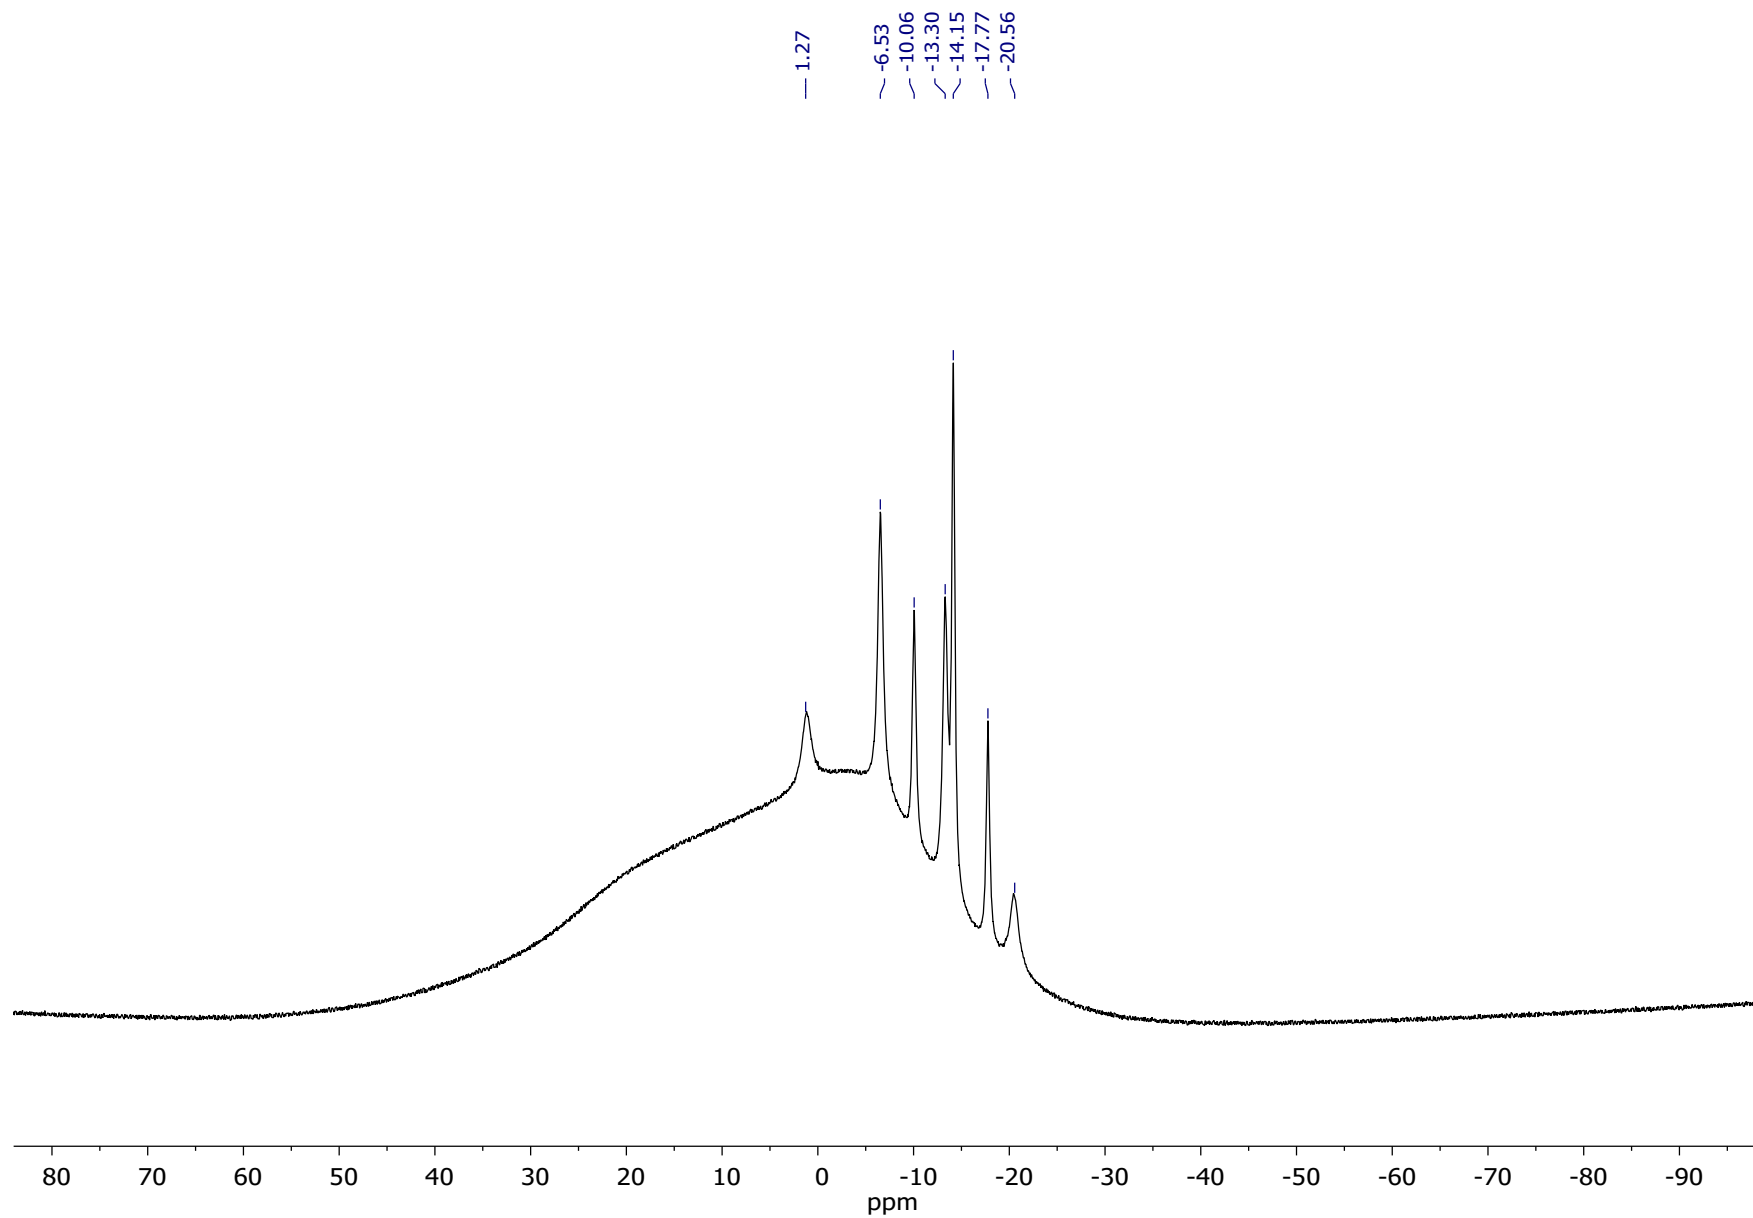

Fig S11.  $^{11}\text{B}$  NMR ( $\text{CDCl}_3$ ) spectrum of *cis*-penta[phenyl(1(3-(9-*m*-carboranyl)propyl)dimethylsiloxy)]cyclopentasiloxane (cycle 5)

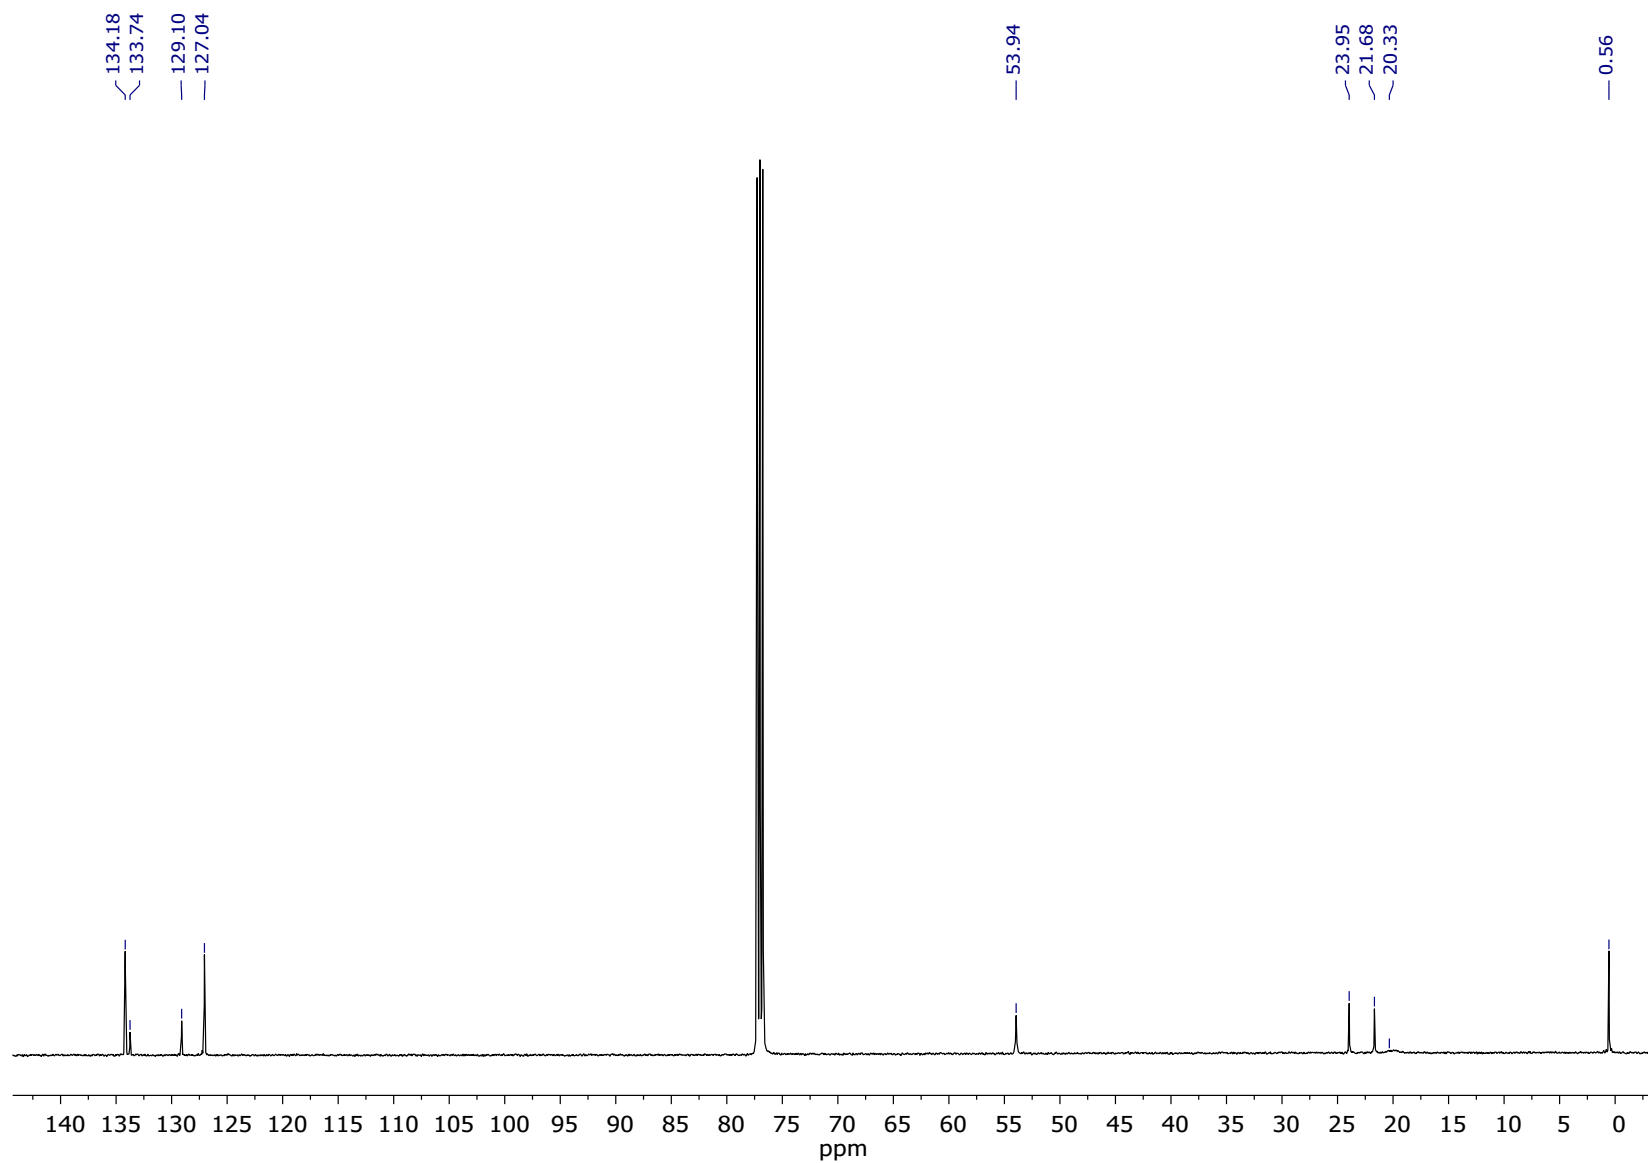

Fig S12.  $^{13}\text{C}$  NMR ( $\text{CDCl}_3$ ) spectrum of *cis*-penta[phenyl(1(3-(9-*m*-carboranyl)propyl)dimethylsiloxy)]cyclopentasiloxane (cycle 5)

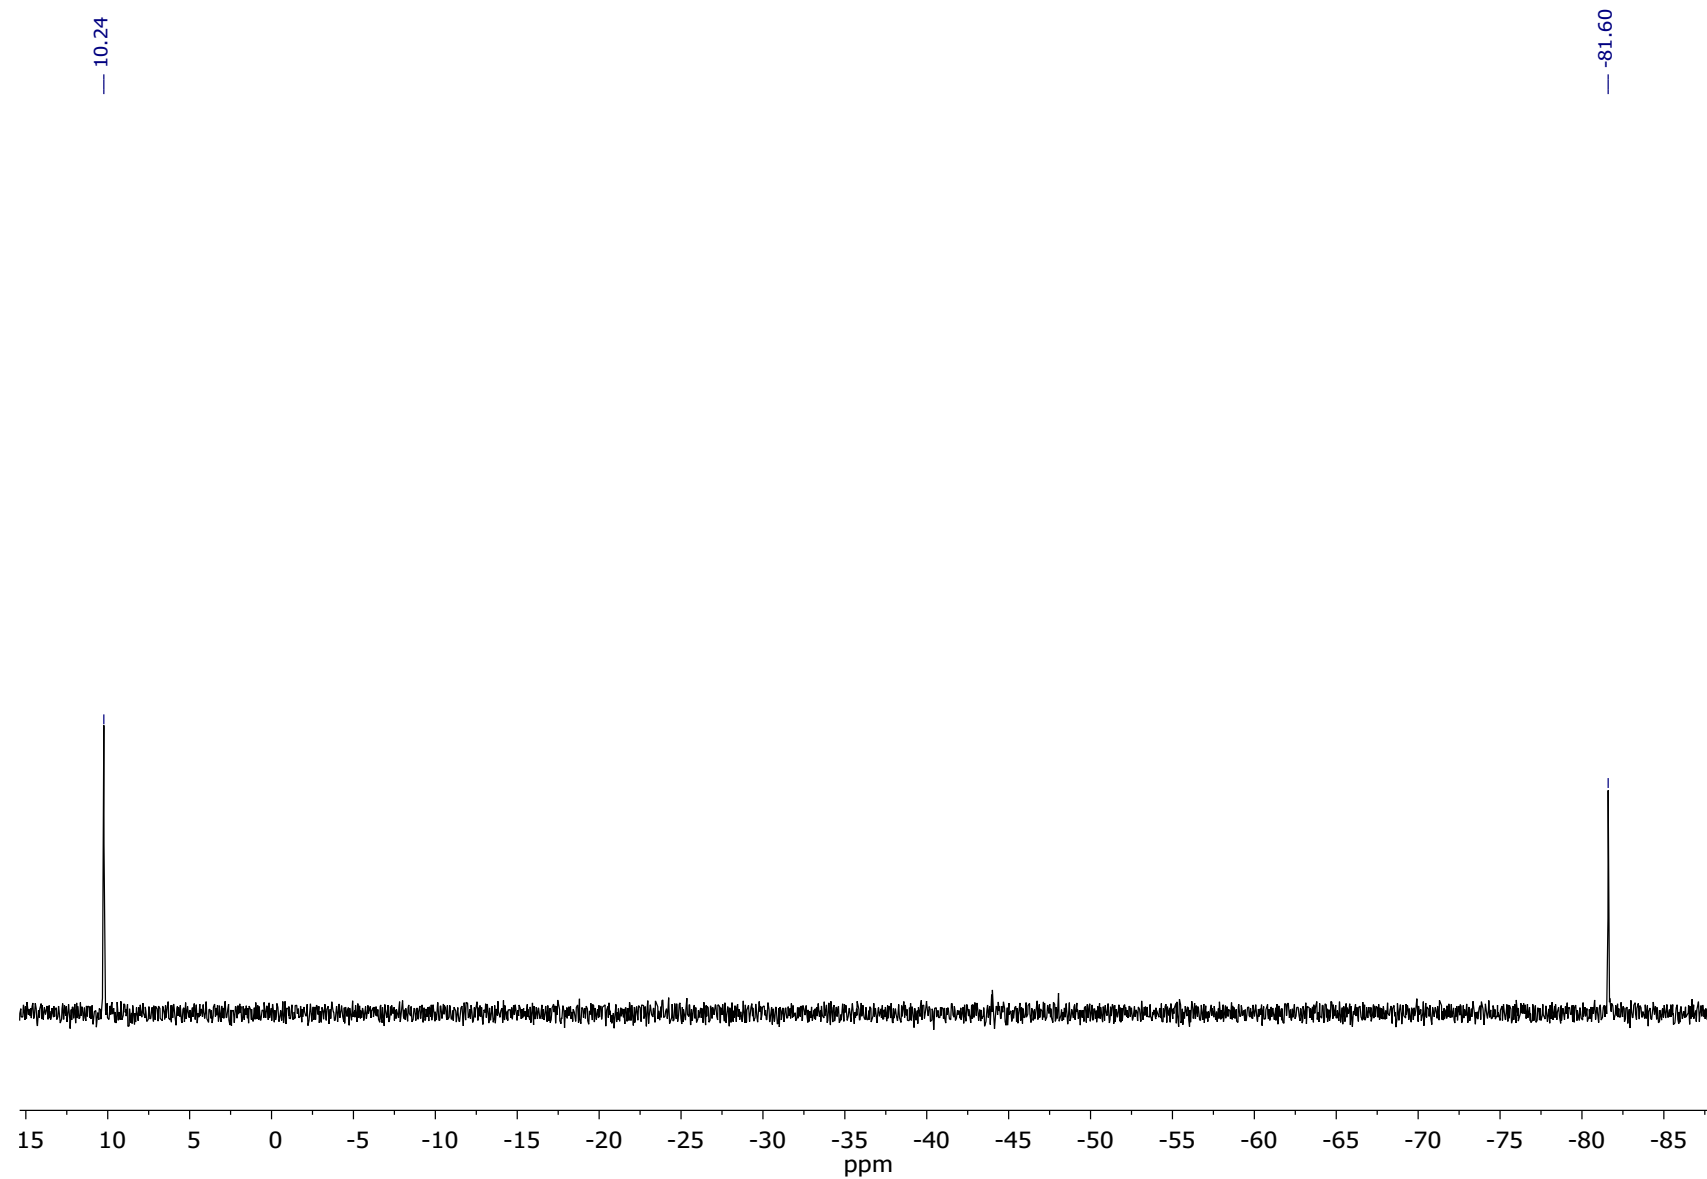

Fig S13.  $^{29}\text{Si}$  NMR ( $\text{CDCl}_3$ ) spectrum of *cis*-penta[phenyl(1(3-(9-*m*-carboranyl)propyl)dimethylsiloxy)]cyclopentasiloxane (cycle 5)

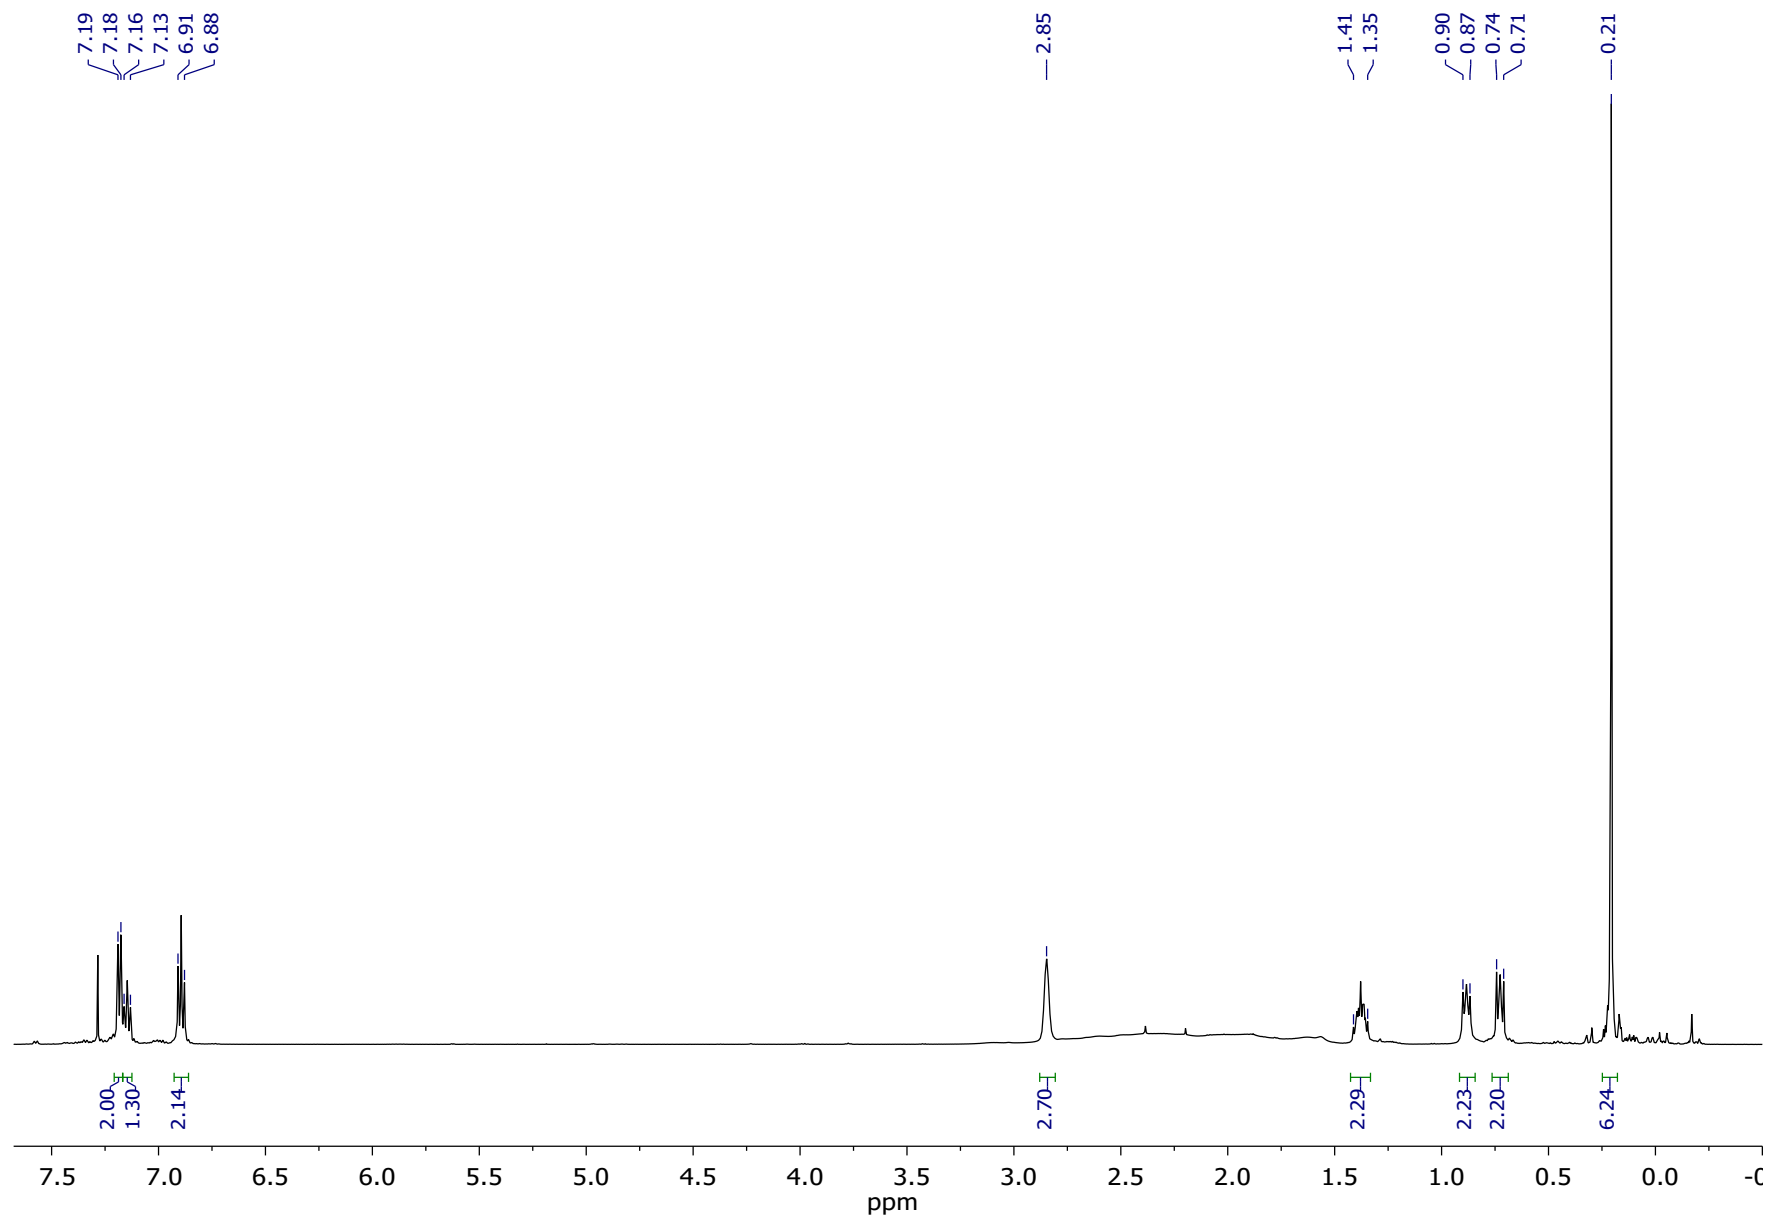

Fig S14. <sup>1</sup>H NMR (CDCl<sub>3</sub>) spectrum of *cis*-hexa[phenyl(1(3-(9-*m*-carboranyl)propyl)dimethylsiloxy)]cyclohexasiloxane (cycle 6)



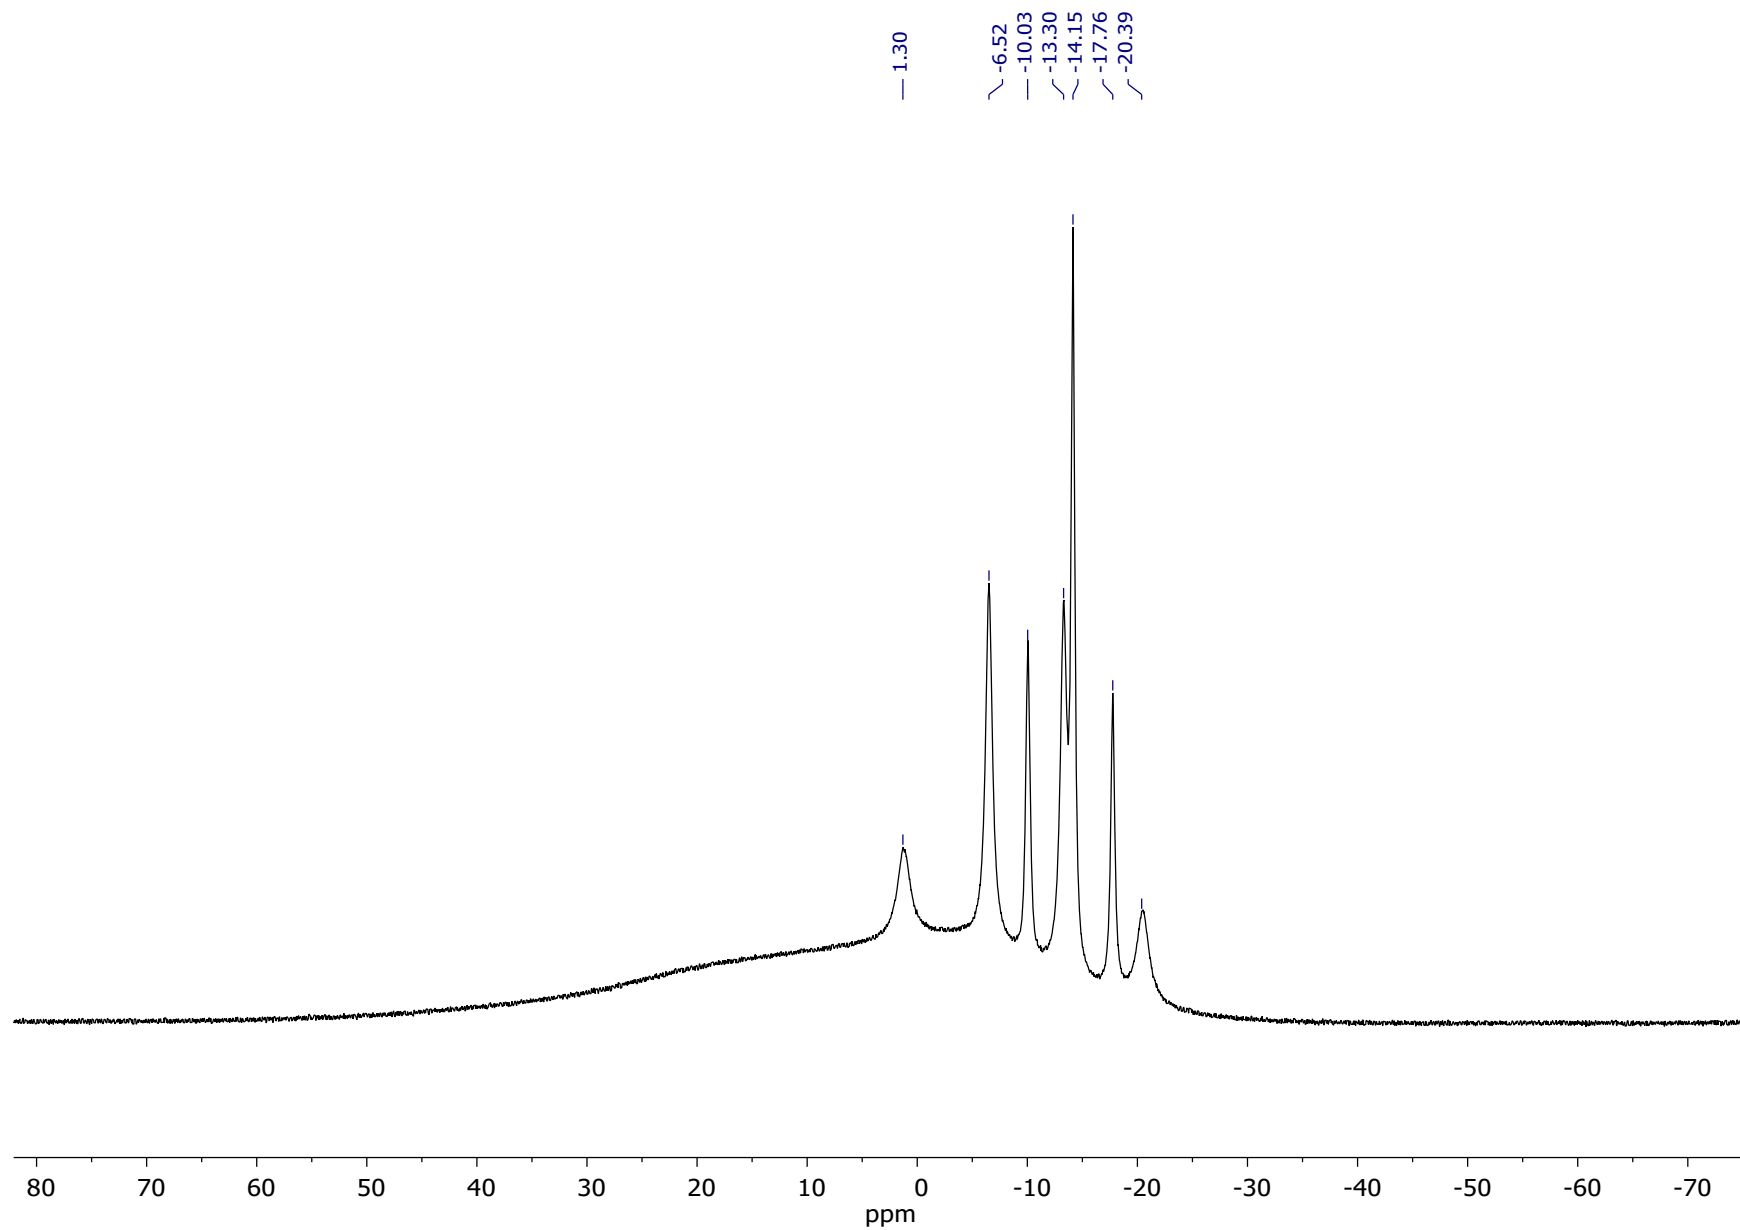

Fig S15.  $^{11}\text{B}$  NMR ( $\text{CDCl}_3$ ) spectrum of *cis*-hexa[phenyl(1(3-(9-*m*-carboranyl)propyl)dimethylsiloxy)]cyclohexasiloxane (cycle 6)

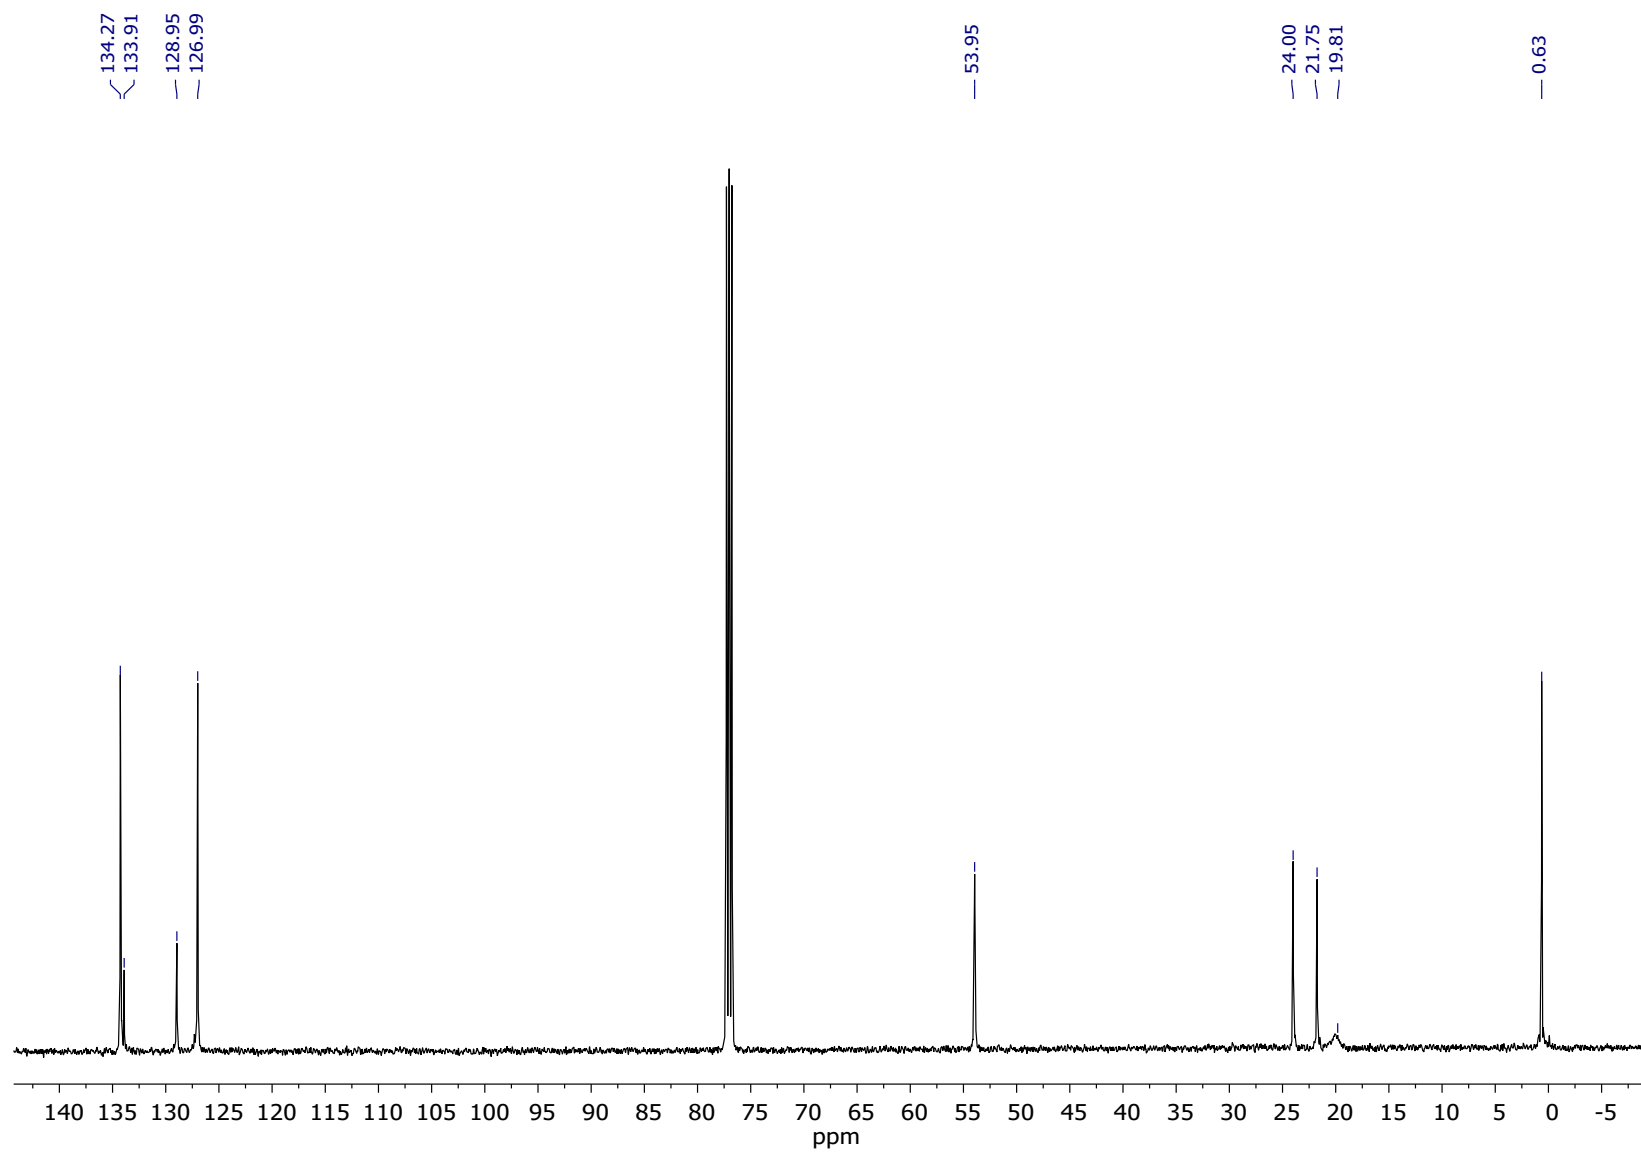

Fig S16.  $^{13}\text{C}$  NMR ( $\text{CDCl}_3$ ) spectrum of *cis*-hexa[phenyl(1(3-(9-*m*-carboranyl)propyl)dimethylsiloxy)]cyclohexasiloxane (cycle 6)

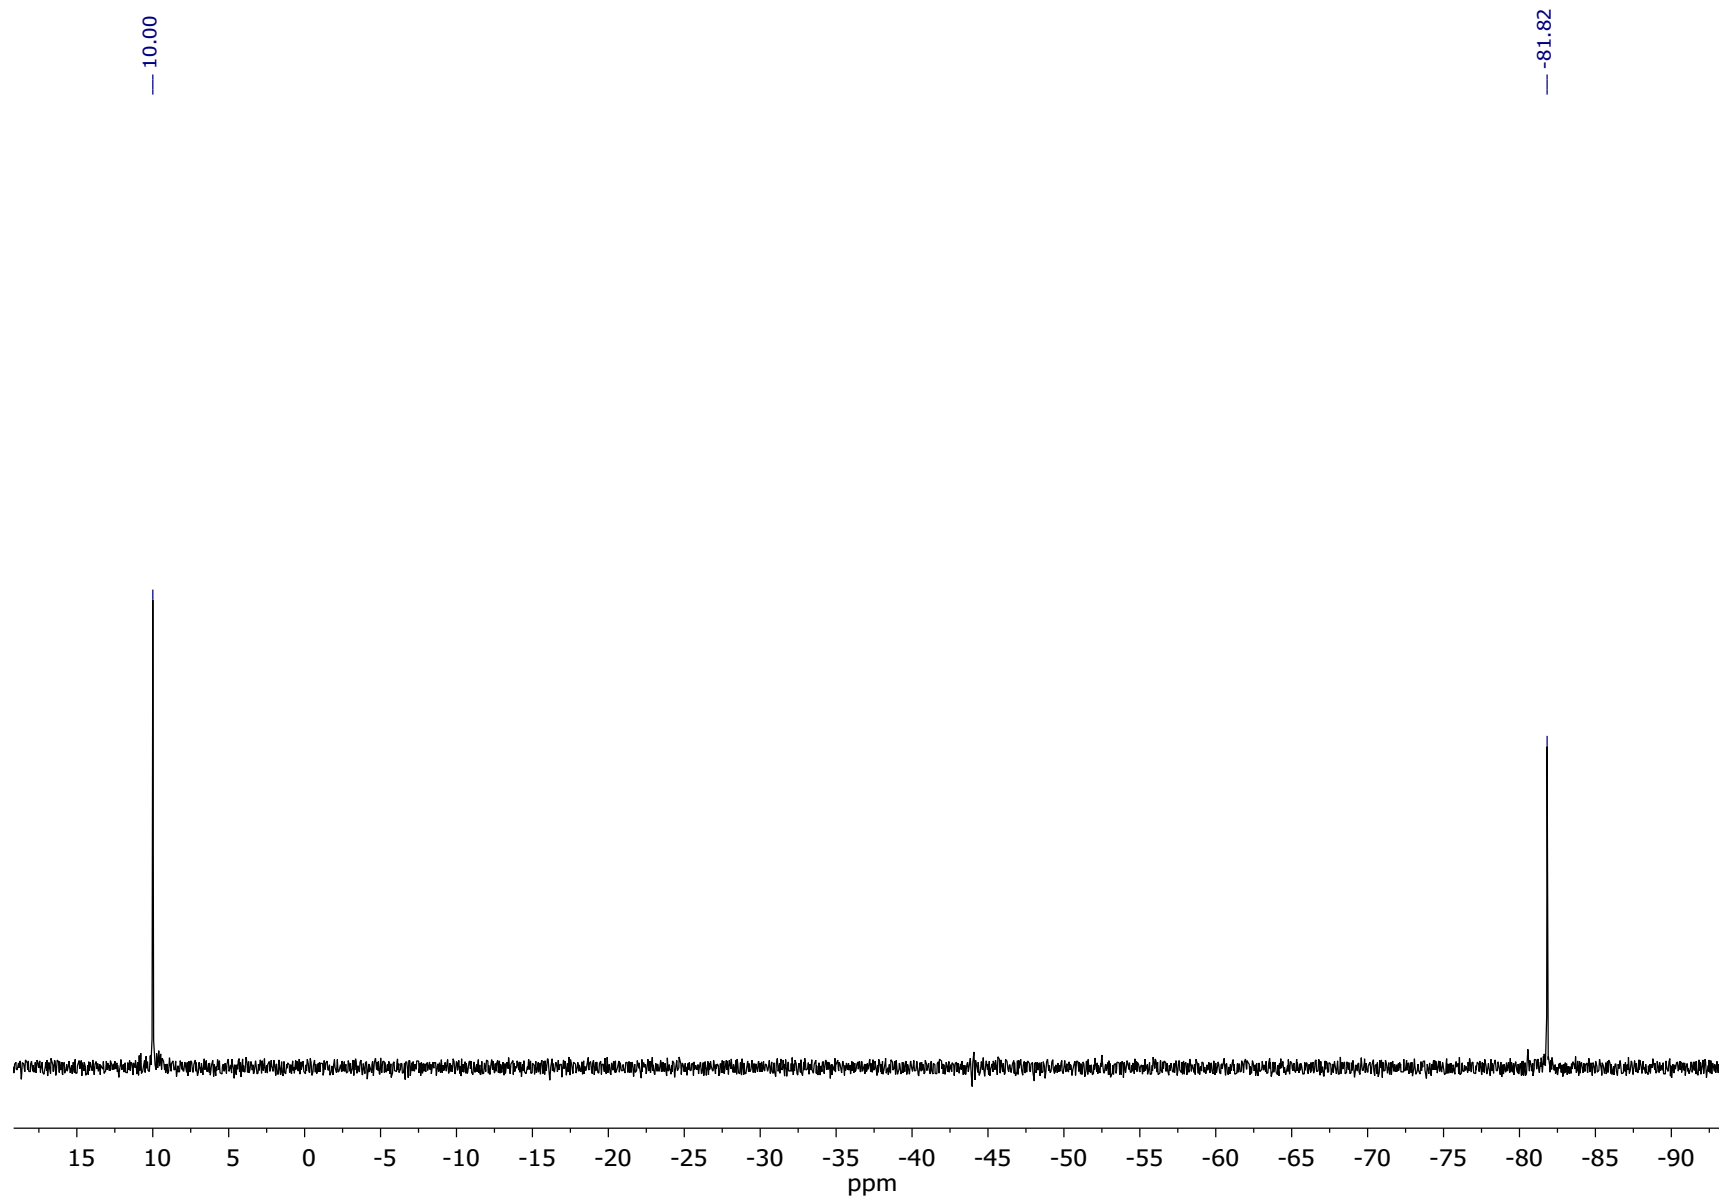

Fig S17.  $^{29}\text{Si}$  NMR ( $\text{CDCl}_3$ ) spectrum of *cis*-hexa[phenyl(1(3-(9-*m*-carboranyl)propyl)dimethylsiloxy)]cyclohexasiloxane (cycle 6)

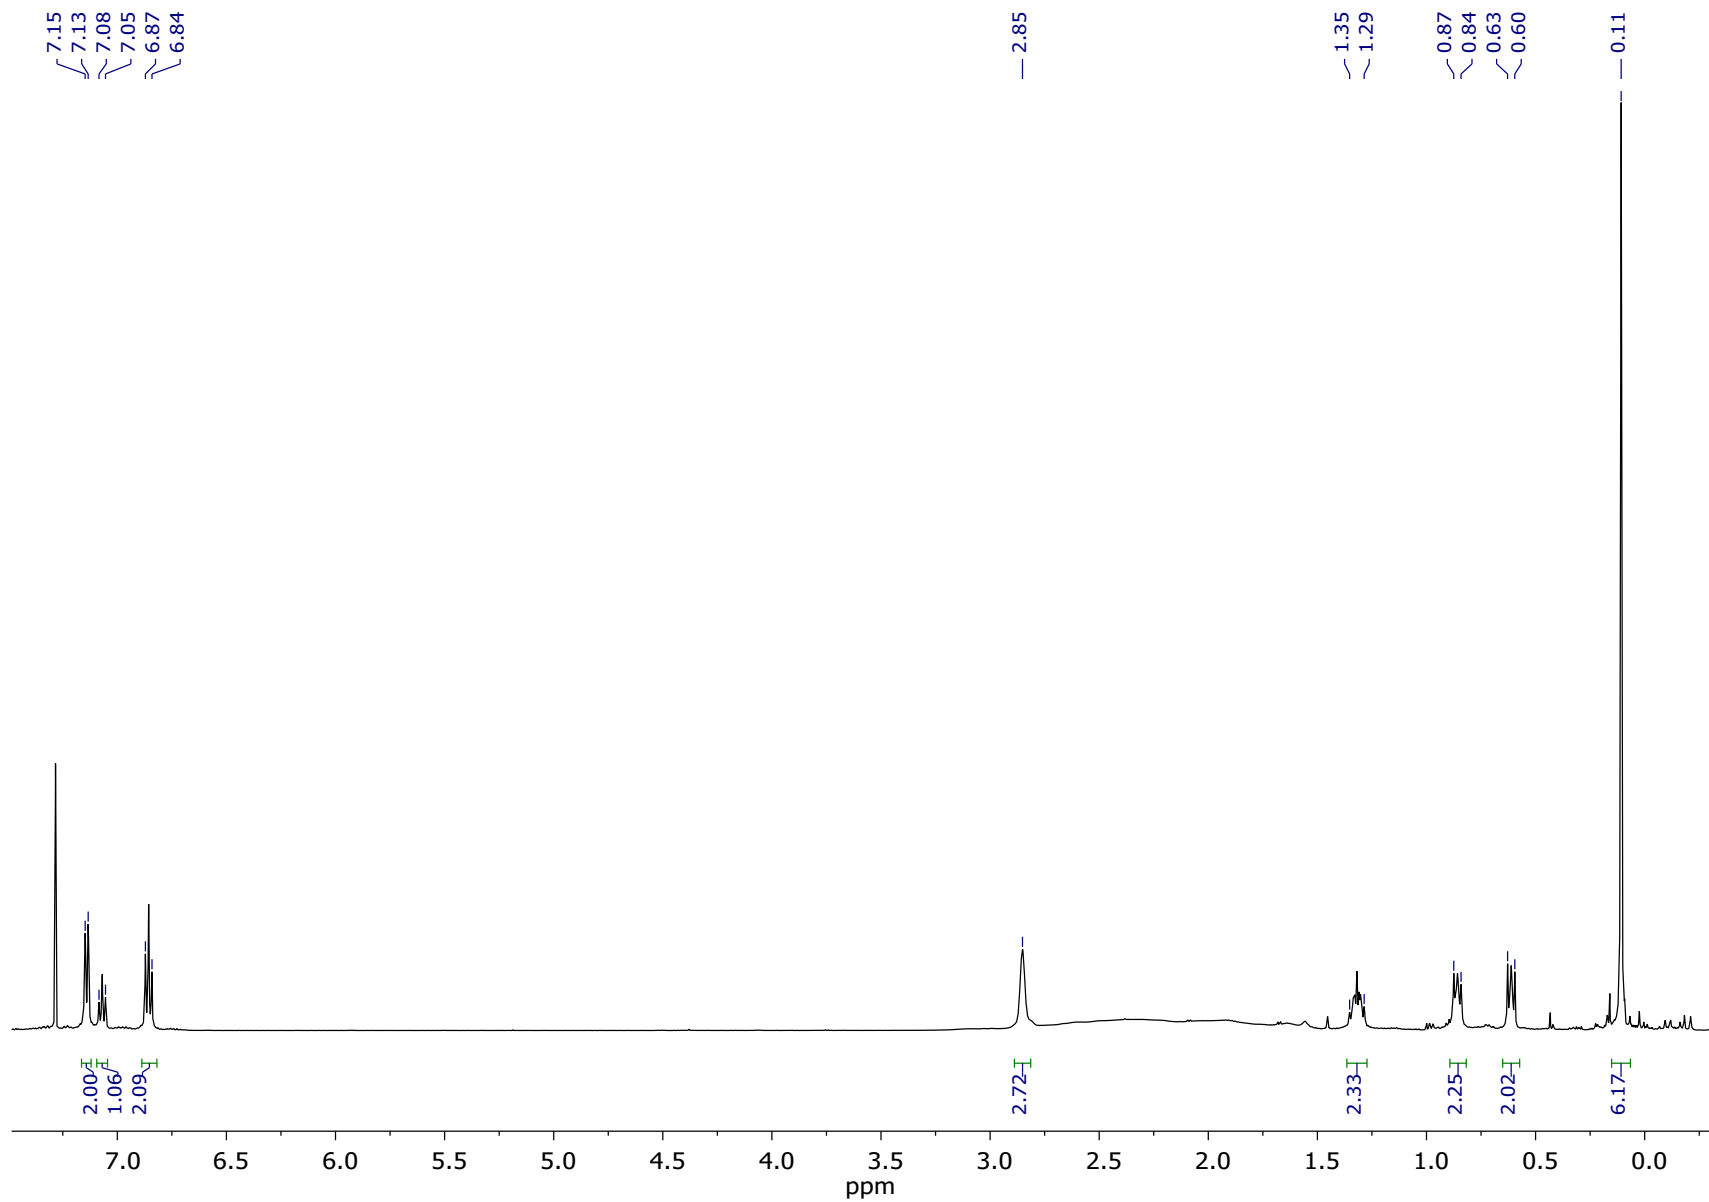

Fig S18.  $^1\text{H}$  NMR ( $\text{CDCl}_3$ ) spectrum of *cis*-octa[phenyl(1(3-(9-*m*-carboranyl)propyl)dimethylsiloxy)]cyclooctasiloxane (cycle 8)

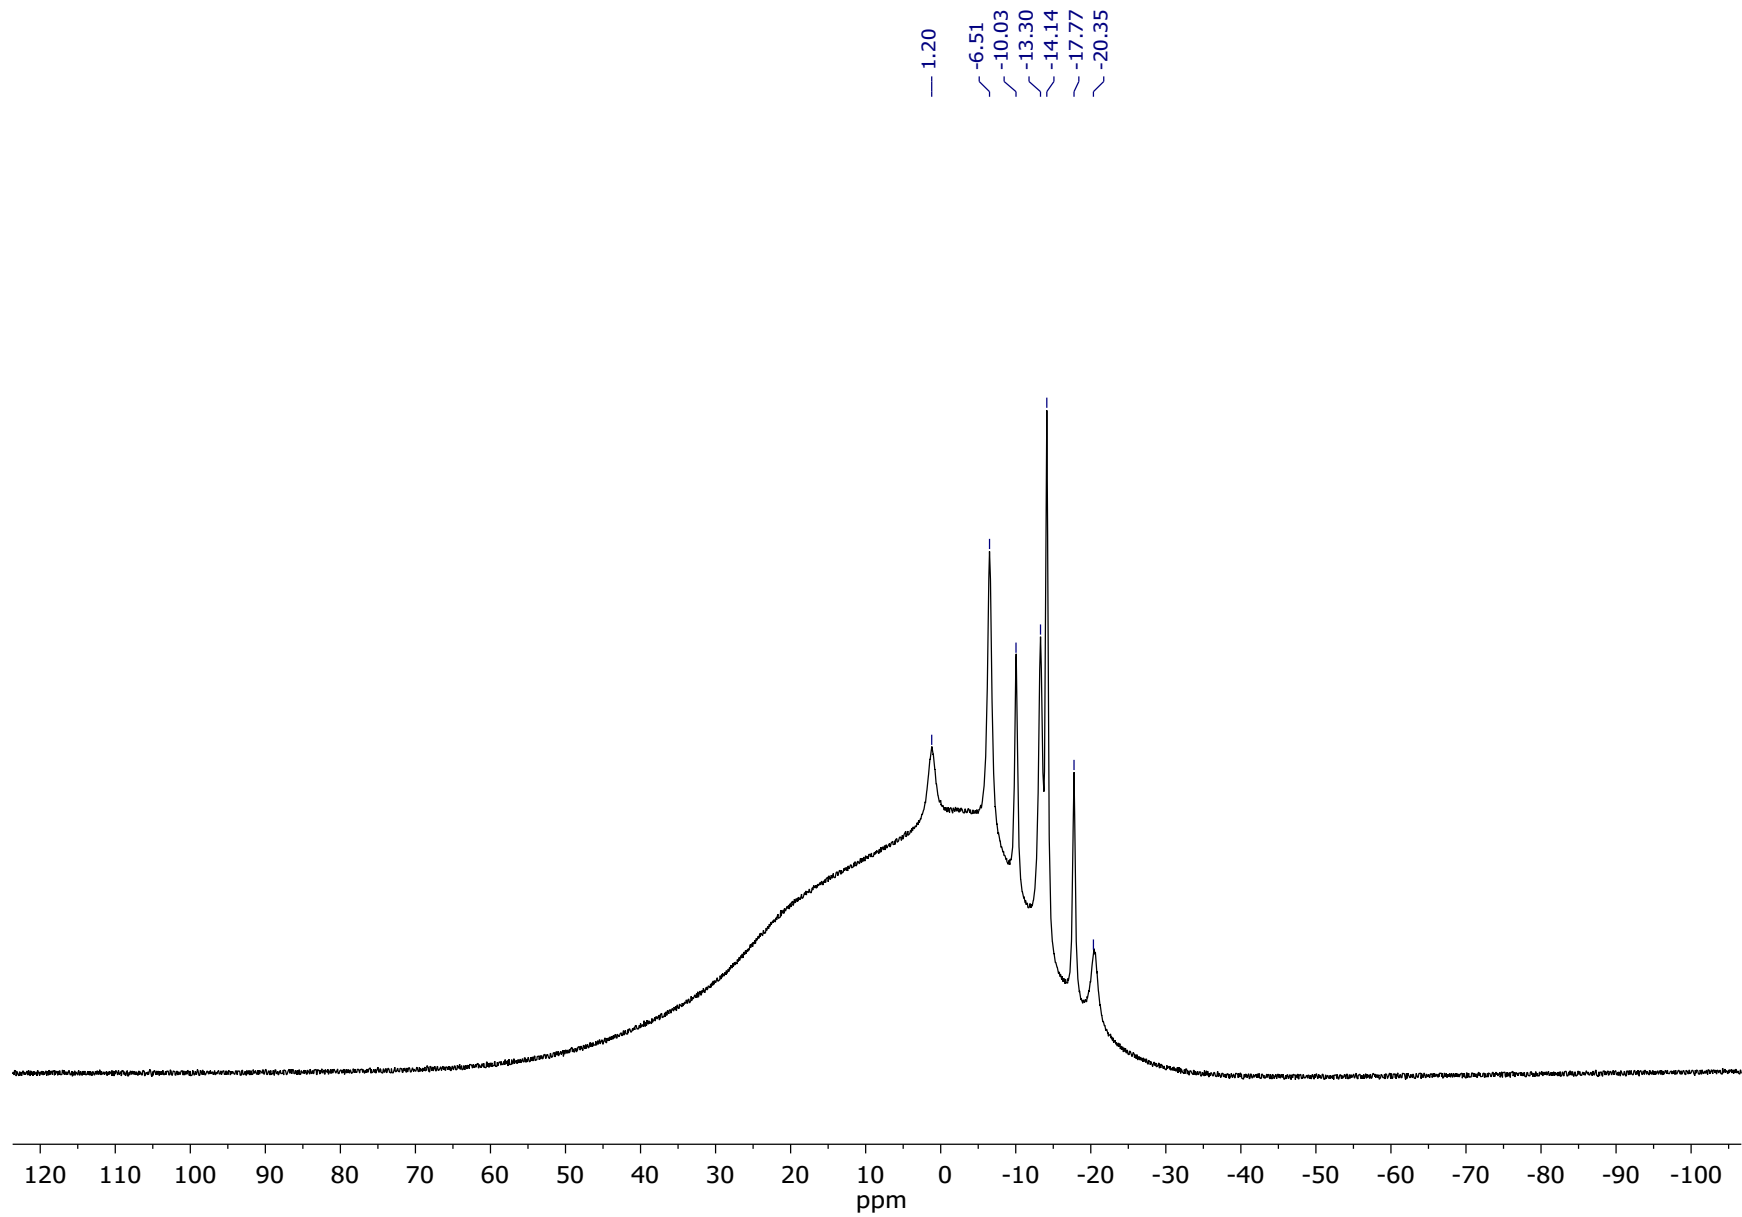

Fig S19.  $^{11}\text{B}$  NMR ( $\text{CDCl}_3$ ) spectrum of *cis*-octa[phenyl(1(3-(9-*m*-carboranyl)propyl)dimethylsiloxy)]cyclooctasiloxane (cycle 8)

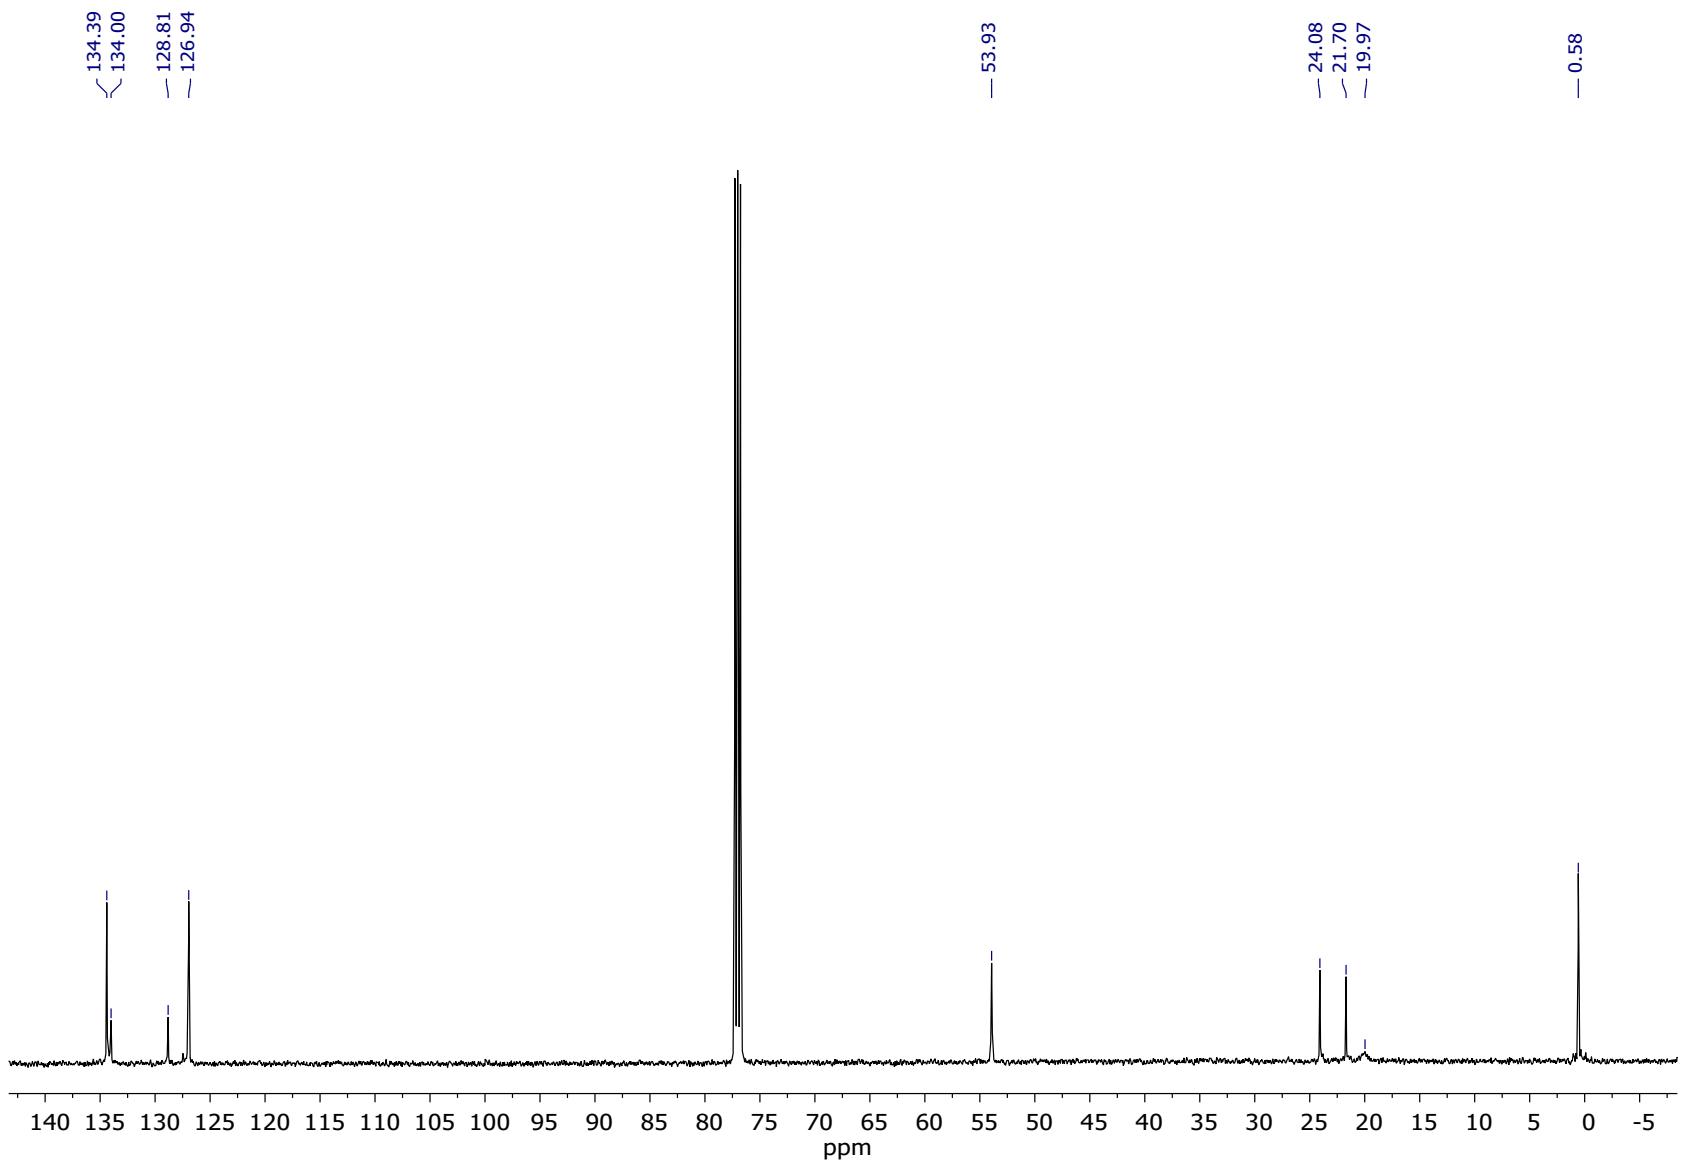

Fig S20.  $^{13}\text{C}$  NMR ( $\text{CDCl}_3$ ) spectrum of *cis*-octa[phenyl(1(3-(9-*m*-carboranyl)propyl)dimethylsiloxy)]cyclooctasiloxane (cycle 8)

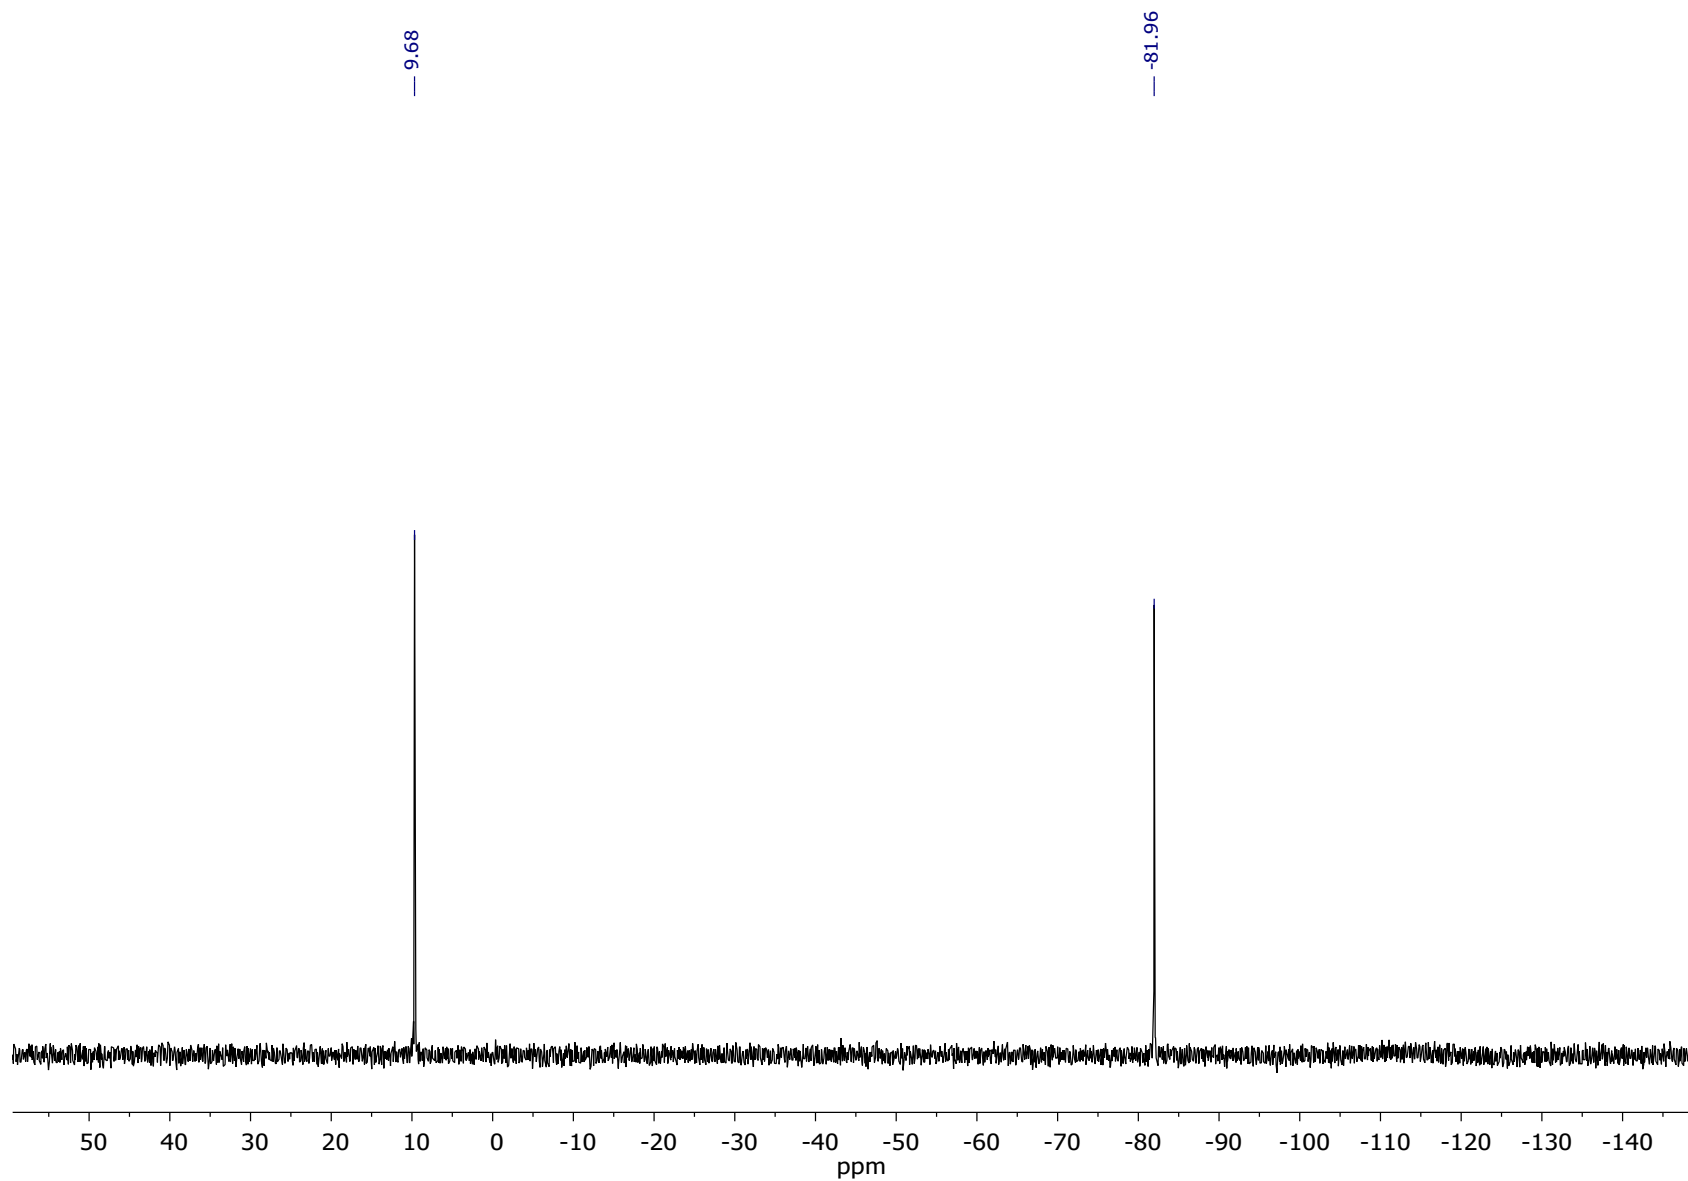

Fig S21.  $^{29}\text{Si}$  NMR ( $\text{CDCl}_3$ ) spectrum of *cis*-octa[phenyl(1(3-(9-*m*-carboranyl)propyl)dimethylsiloxy)]cyclooctasiloxane (cycle 8)

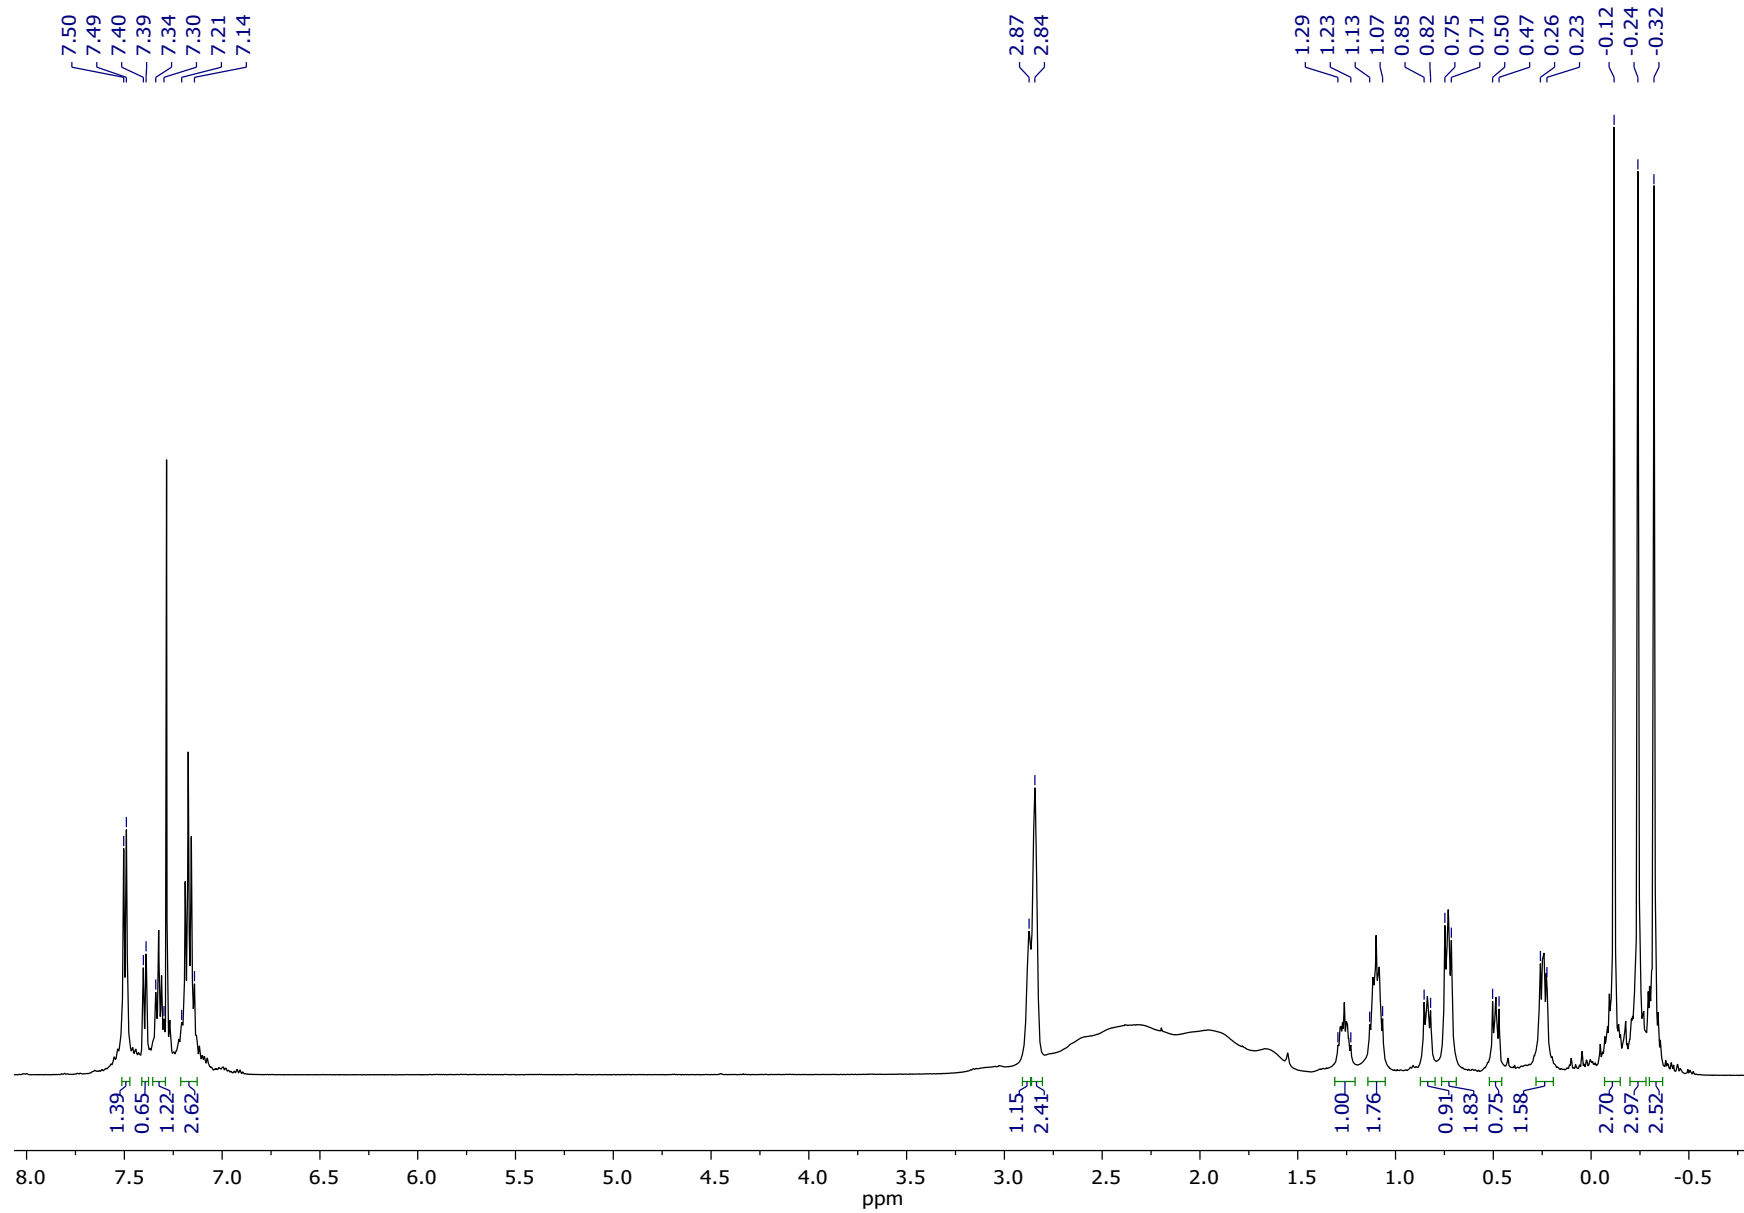

Fig S22.  $^1\text{H}$  NMR ( $\text{CDCl}_3$ ) spectrum of tris-*cis*-tris-*trans*-dodeca[phenyl(1(3-(9-*m*-carboranyl)propyl)dimethylsiloxy)]cyclododecasiloxane (cycle 12)



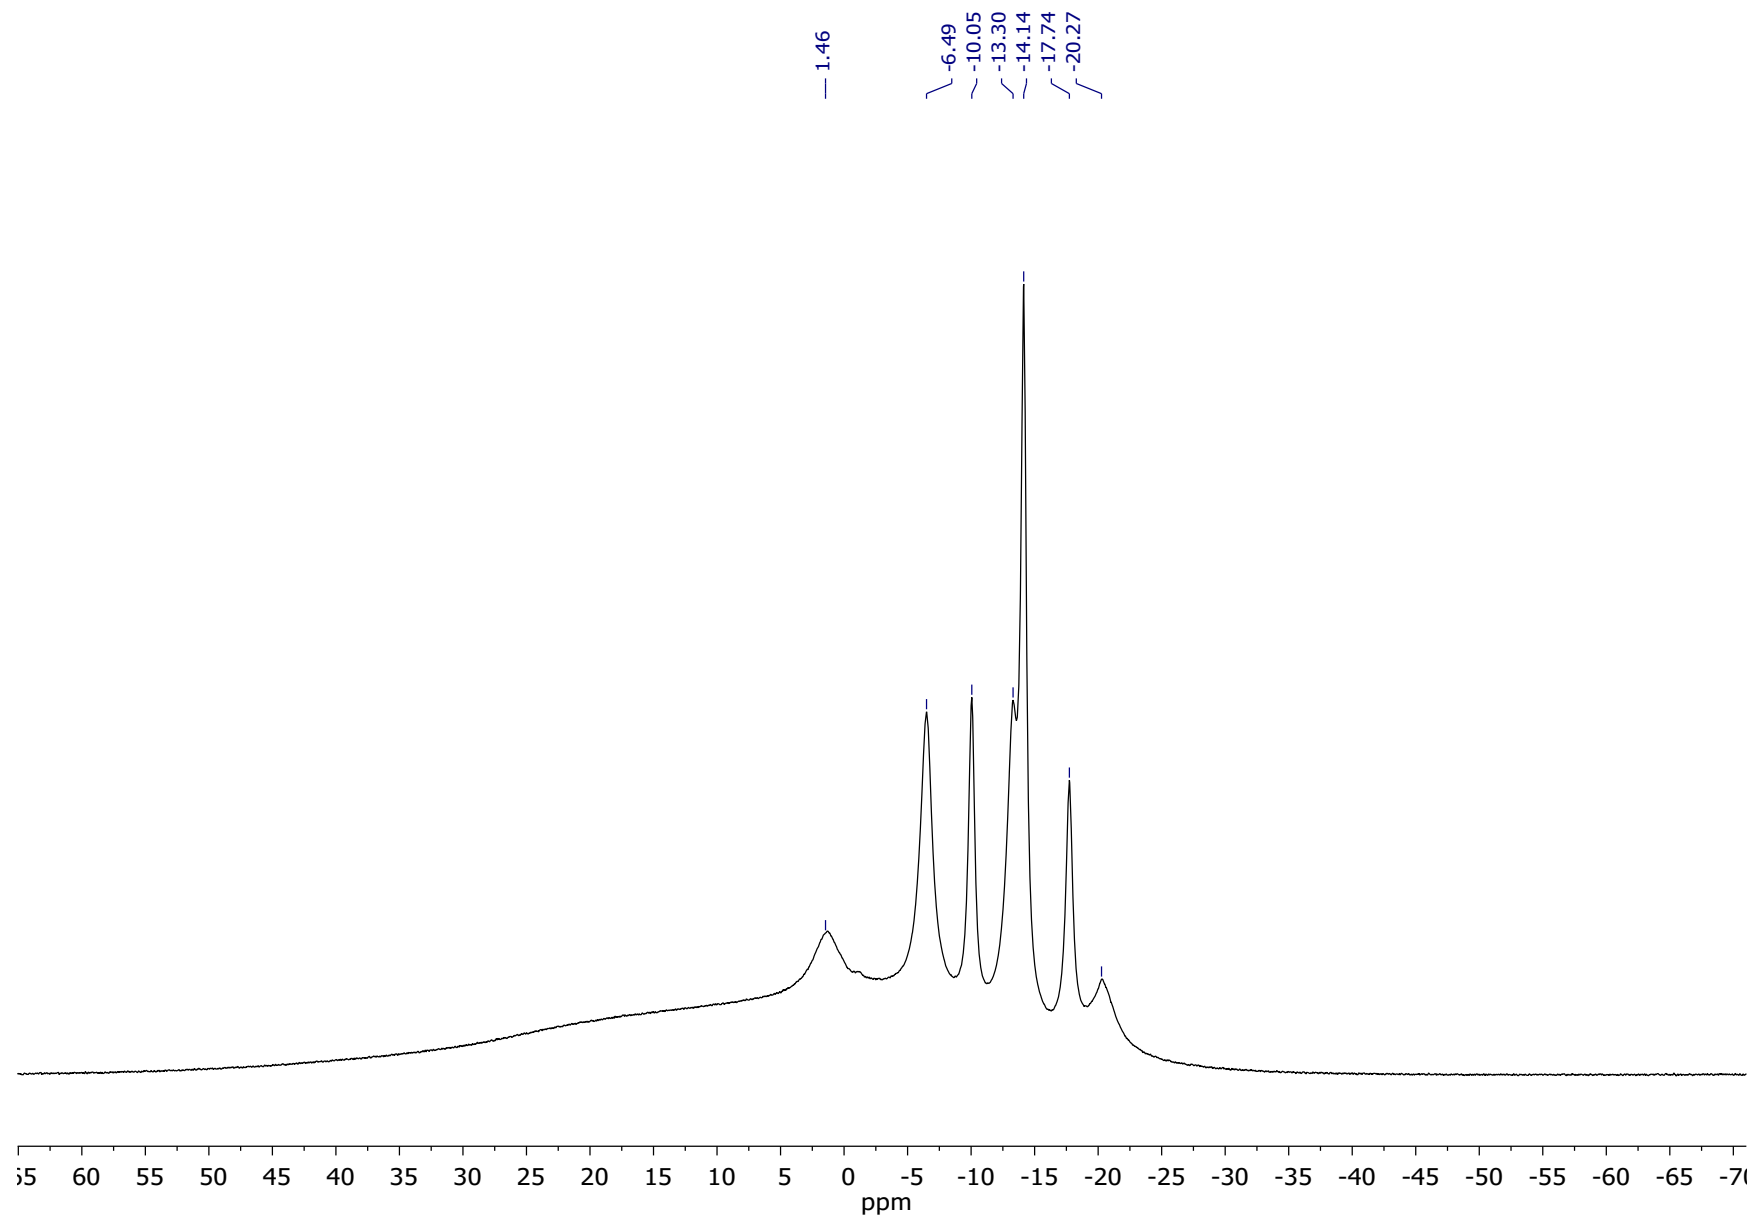

Fig S23.  $^{11}\text{B}$  NMR ( $\text{CDCl}_3$ ) spectrum of tris-*cis*-tris-*trans*-dodeca[phenyl(1(3-(9-*m*-carboranyl)propyl)dimethylsiloxy)]cyclododecasiloxane (cycle 12)

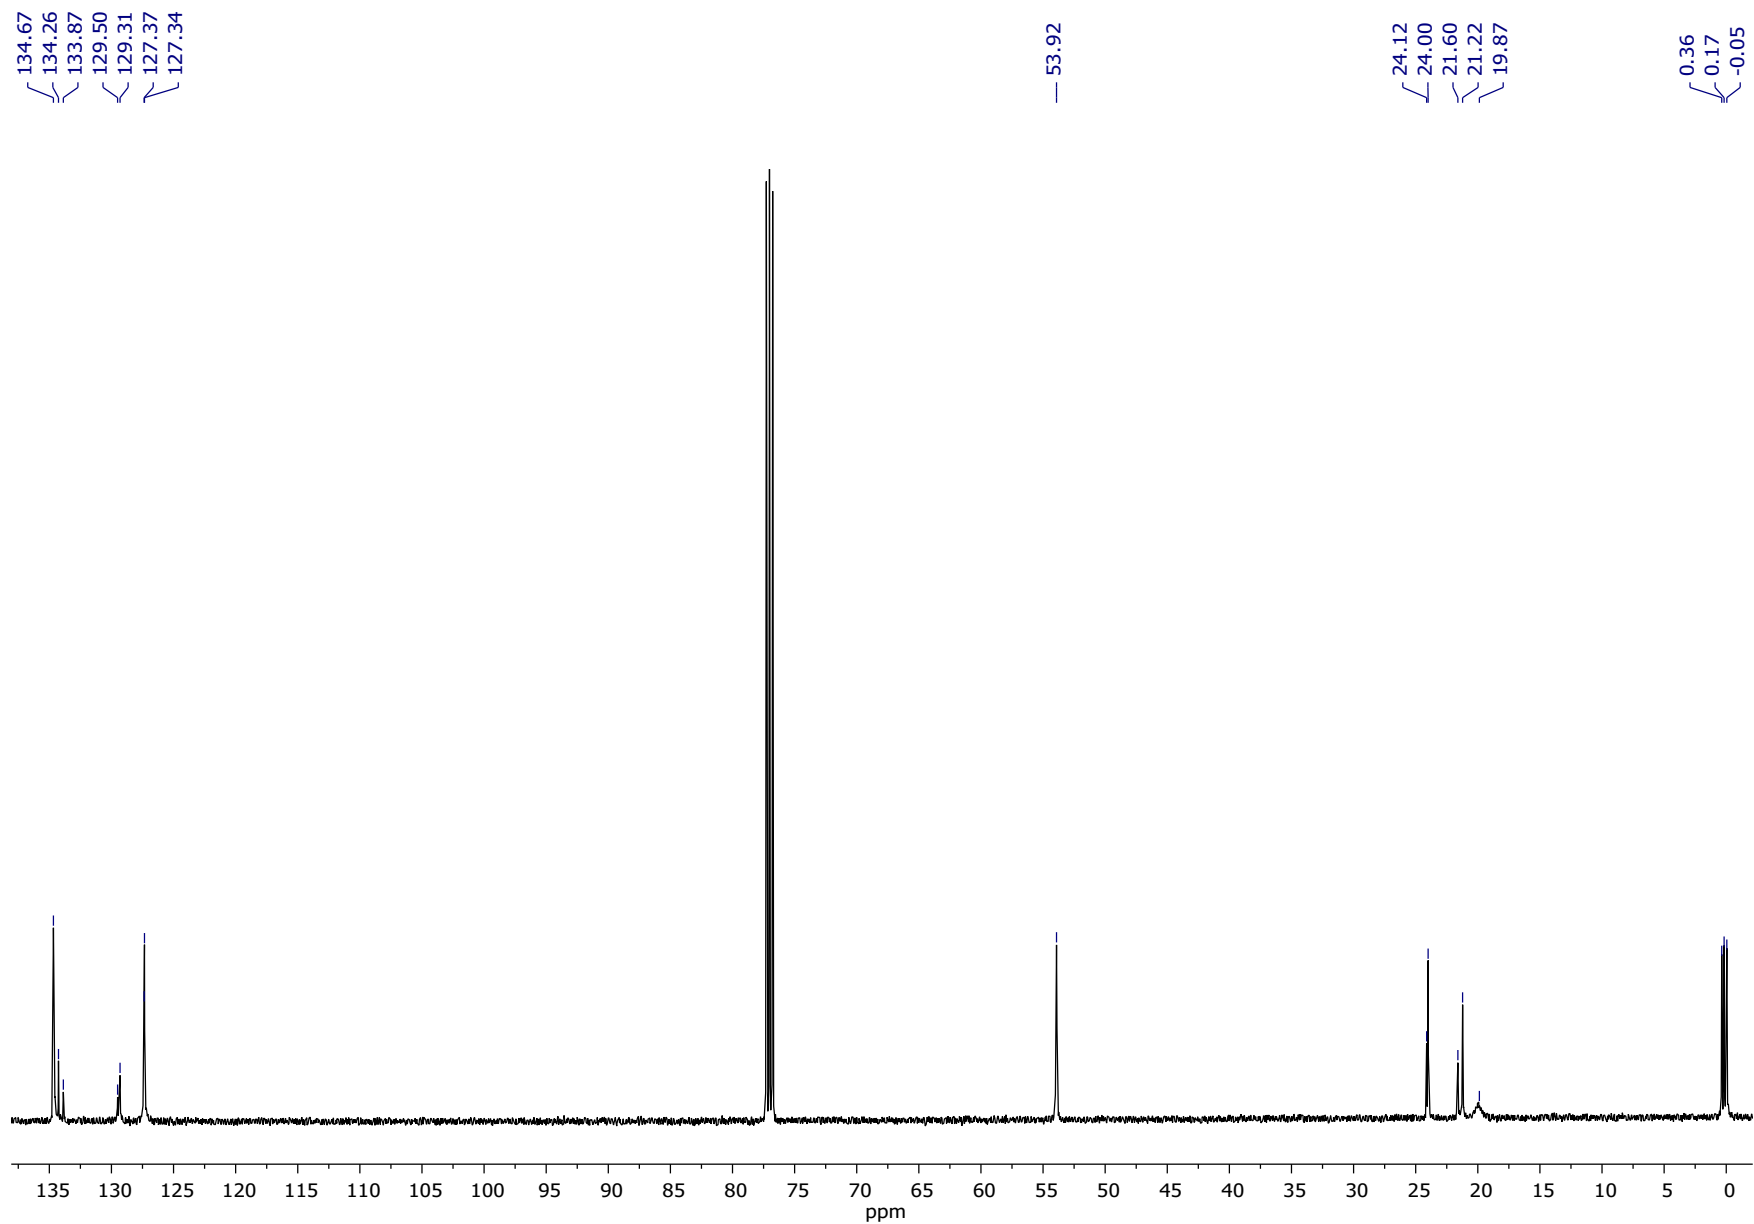

Fig S24.  $^{13}\text{C}$  NMR ( $\text{CDCl}_3$ ) spectrum of tris-*cis*-tris-*trans*-dodeca[phenyl(1(3-(9-*m*-carboranyl)propyl)dimethylsiloxy)]cyclododecasiloxane (cycle 12)

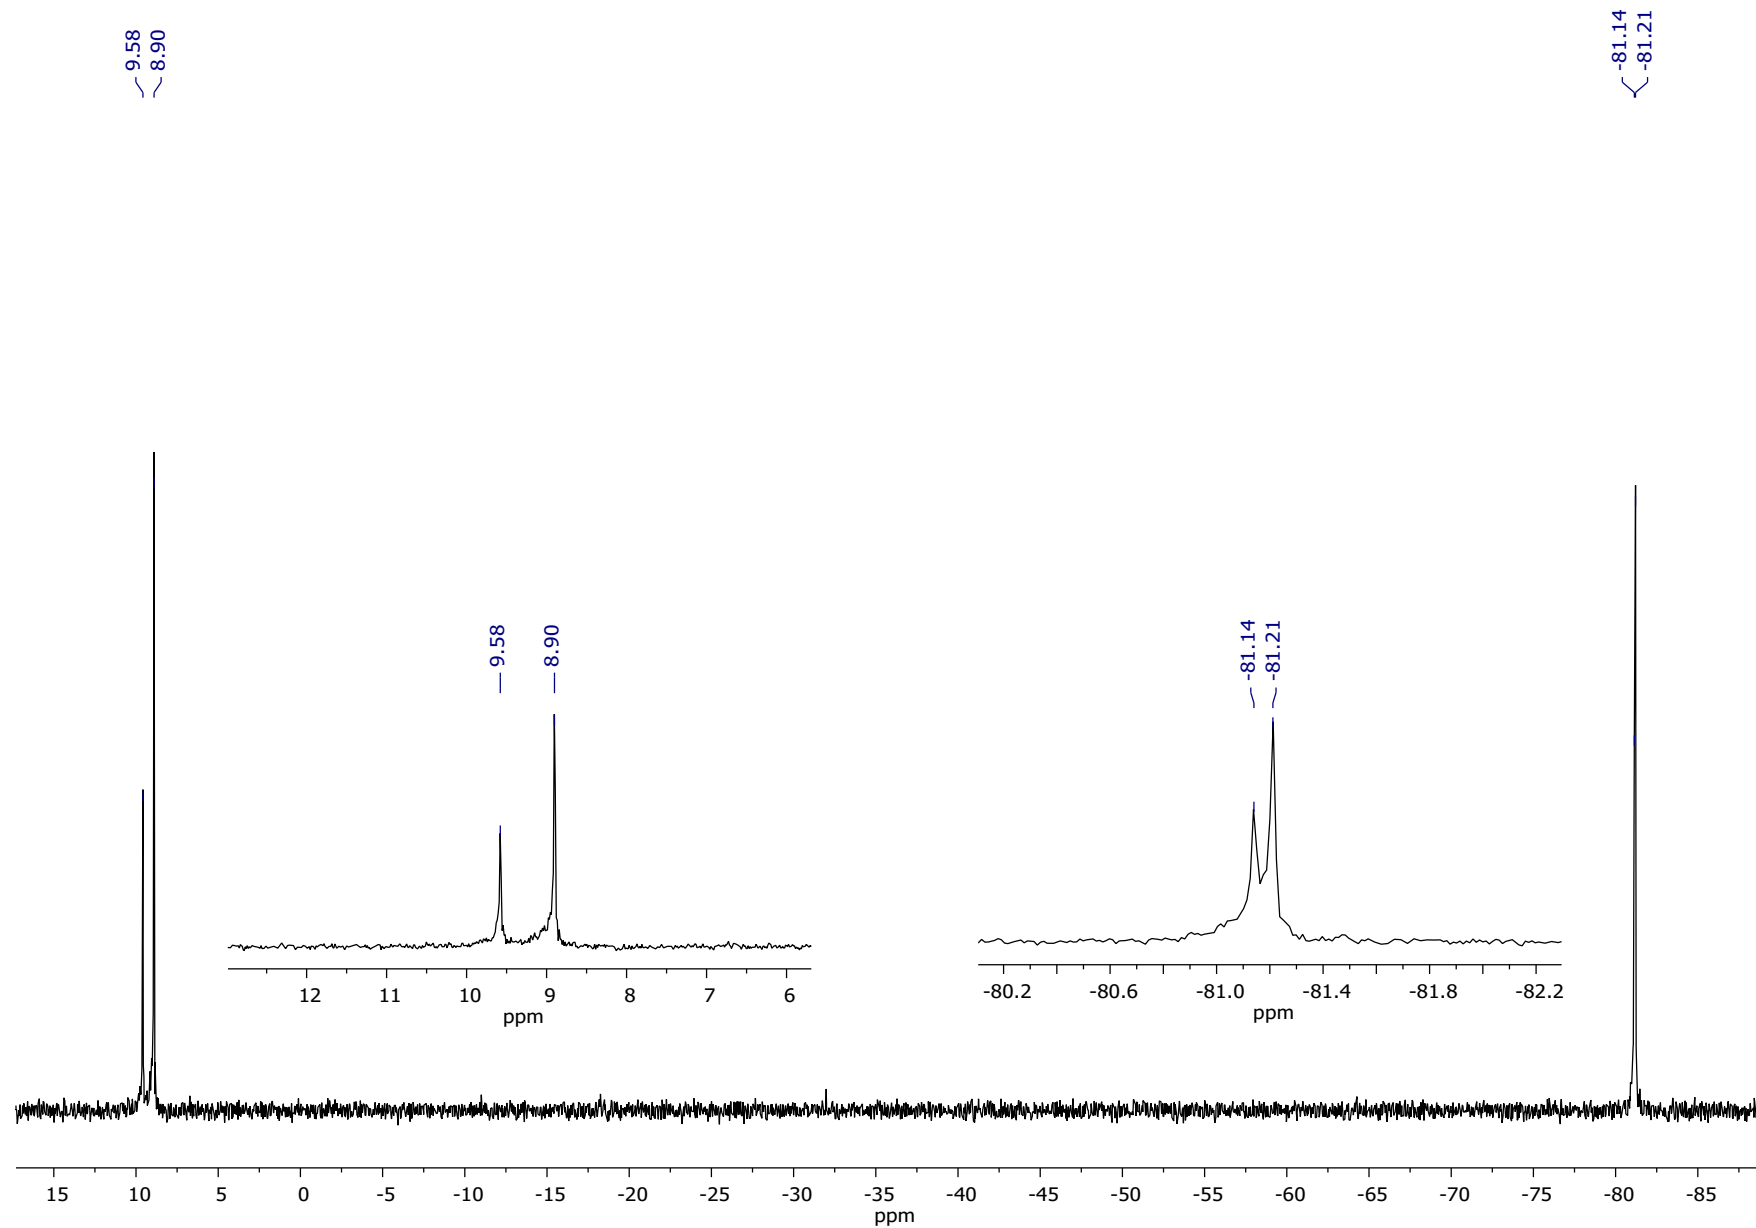

Fig S25.  $^{29}\text{Si}$  NMR ( $\text{CDCl}_3$ ) spectrum of tris-*cis*-tris-*trans*-dodeca[phenyl(1(3-(9-*m*-carboranyl)propyl)dimethylsiloxy)]cyclododecasiloxane (cycle 12)

**IR spectra**

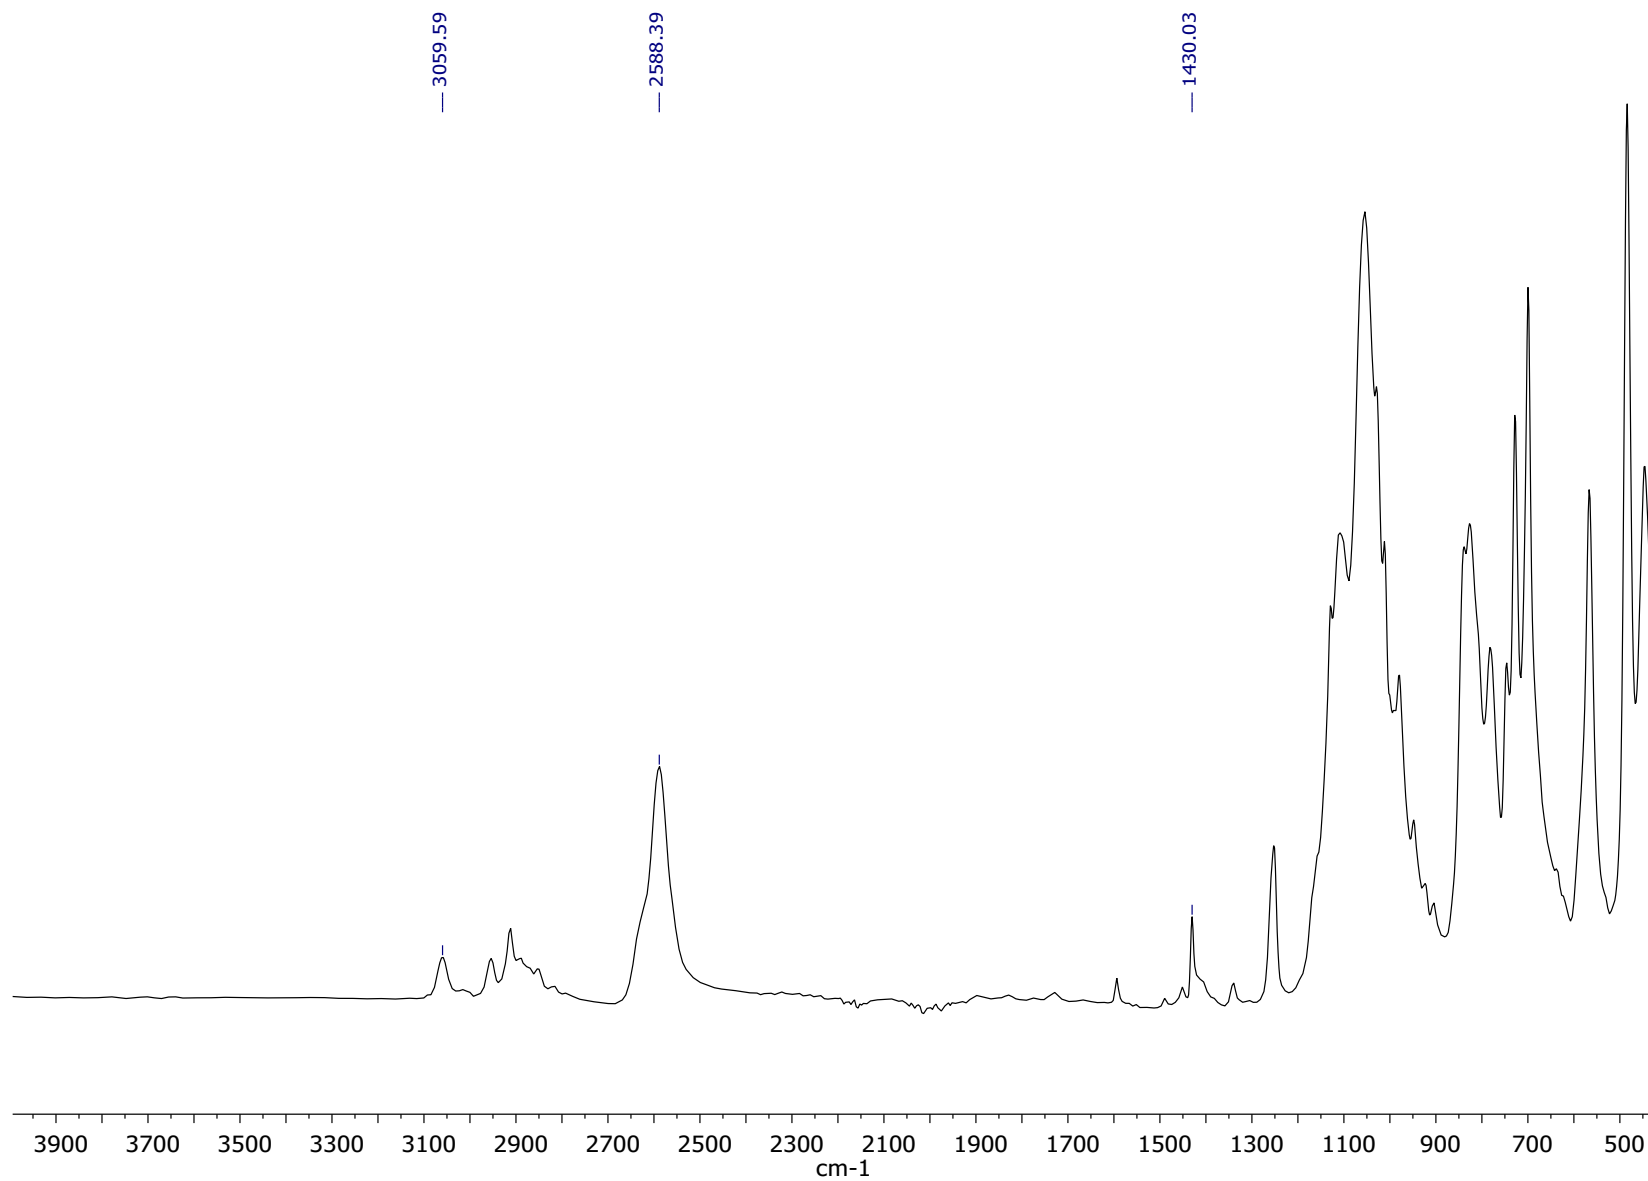

Fig S26. IR (cm<sup>-1</sup>) spectrum of *cis*-tetra[phenyl(1(3-(9-*m*-carboranyl)propyl)dimethylsiloxy)]cyclotetrasiloxane (cycle 4)

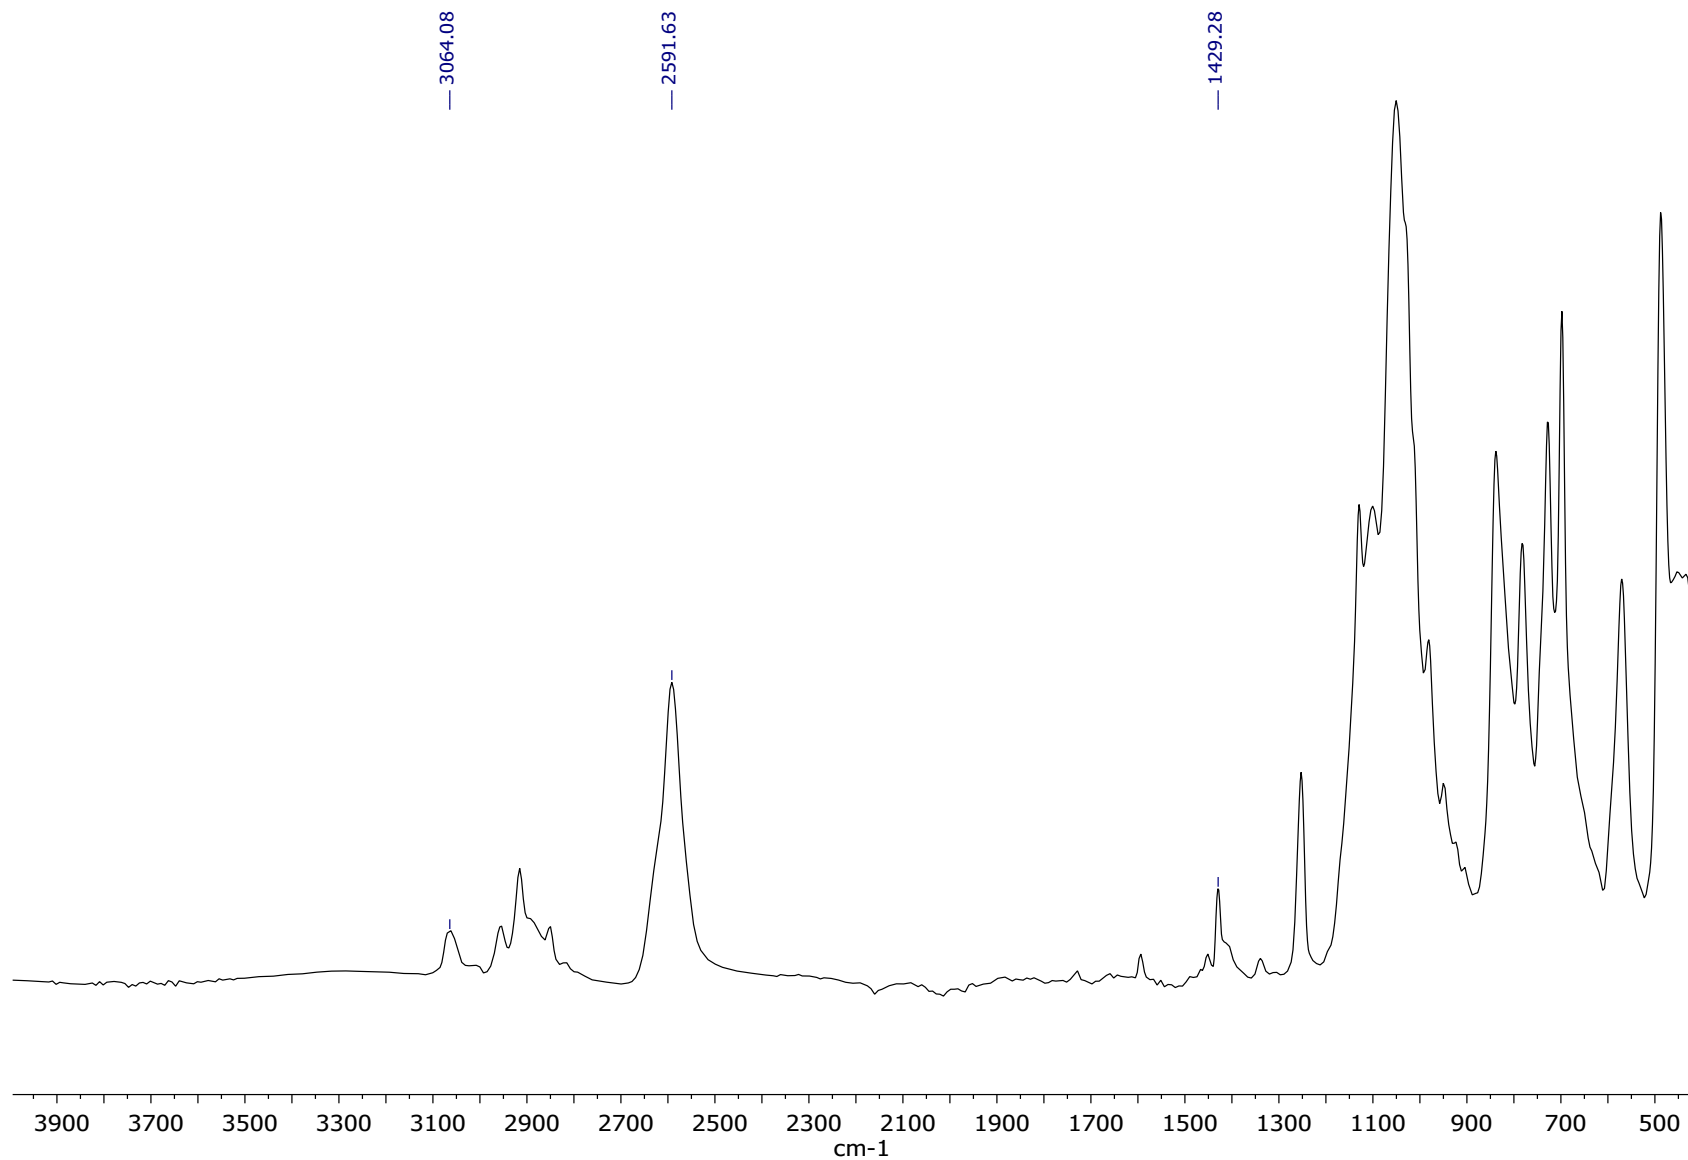

Fig S27. IR (cm<sup>-1</sup>) spectrum of *cis*-penta[phenyl(1(3-(9-*m*-carboranyl)propyl)dimethylsiloxy)]cyclopentasiloxane (cycle 5)

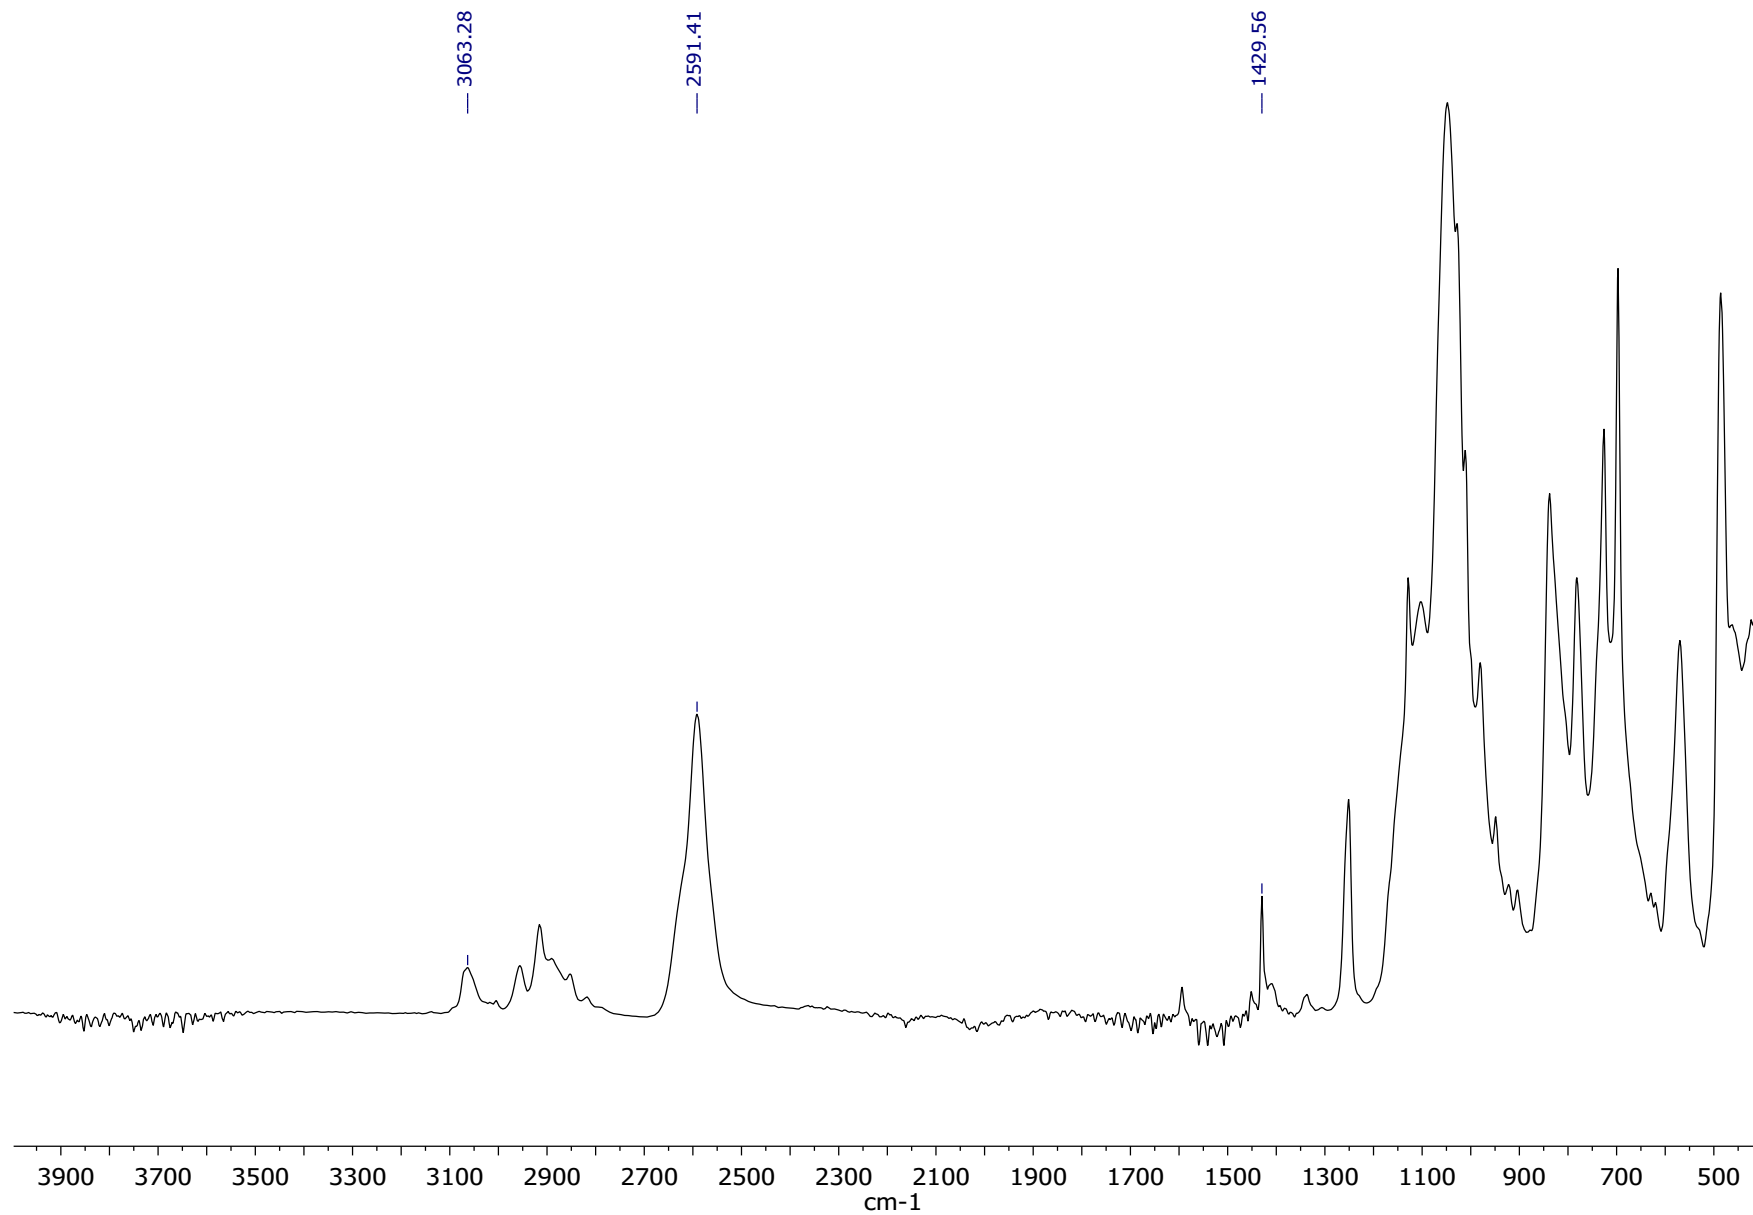

Fig S28. IR (cm<sup>-1</sup>) spectrum of *cis*-hexa[phenyl(1(3-(9-*m*-carboranyl)propyl)dimethylsiloxy)]cyclohexasiloxane (cycle 6)

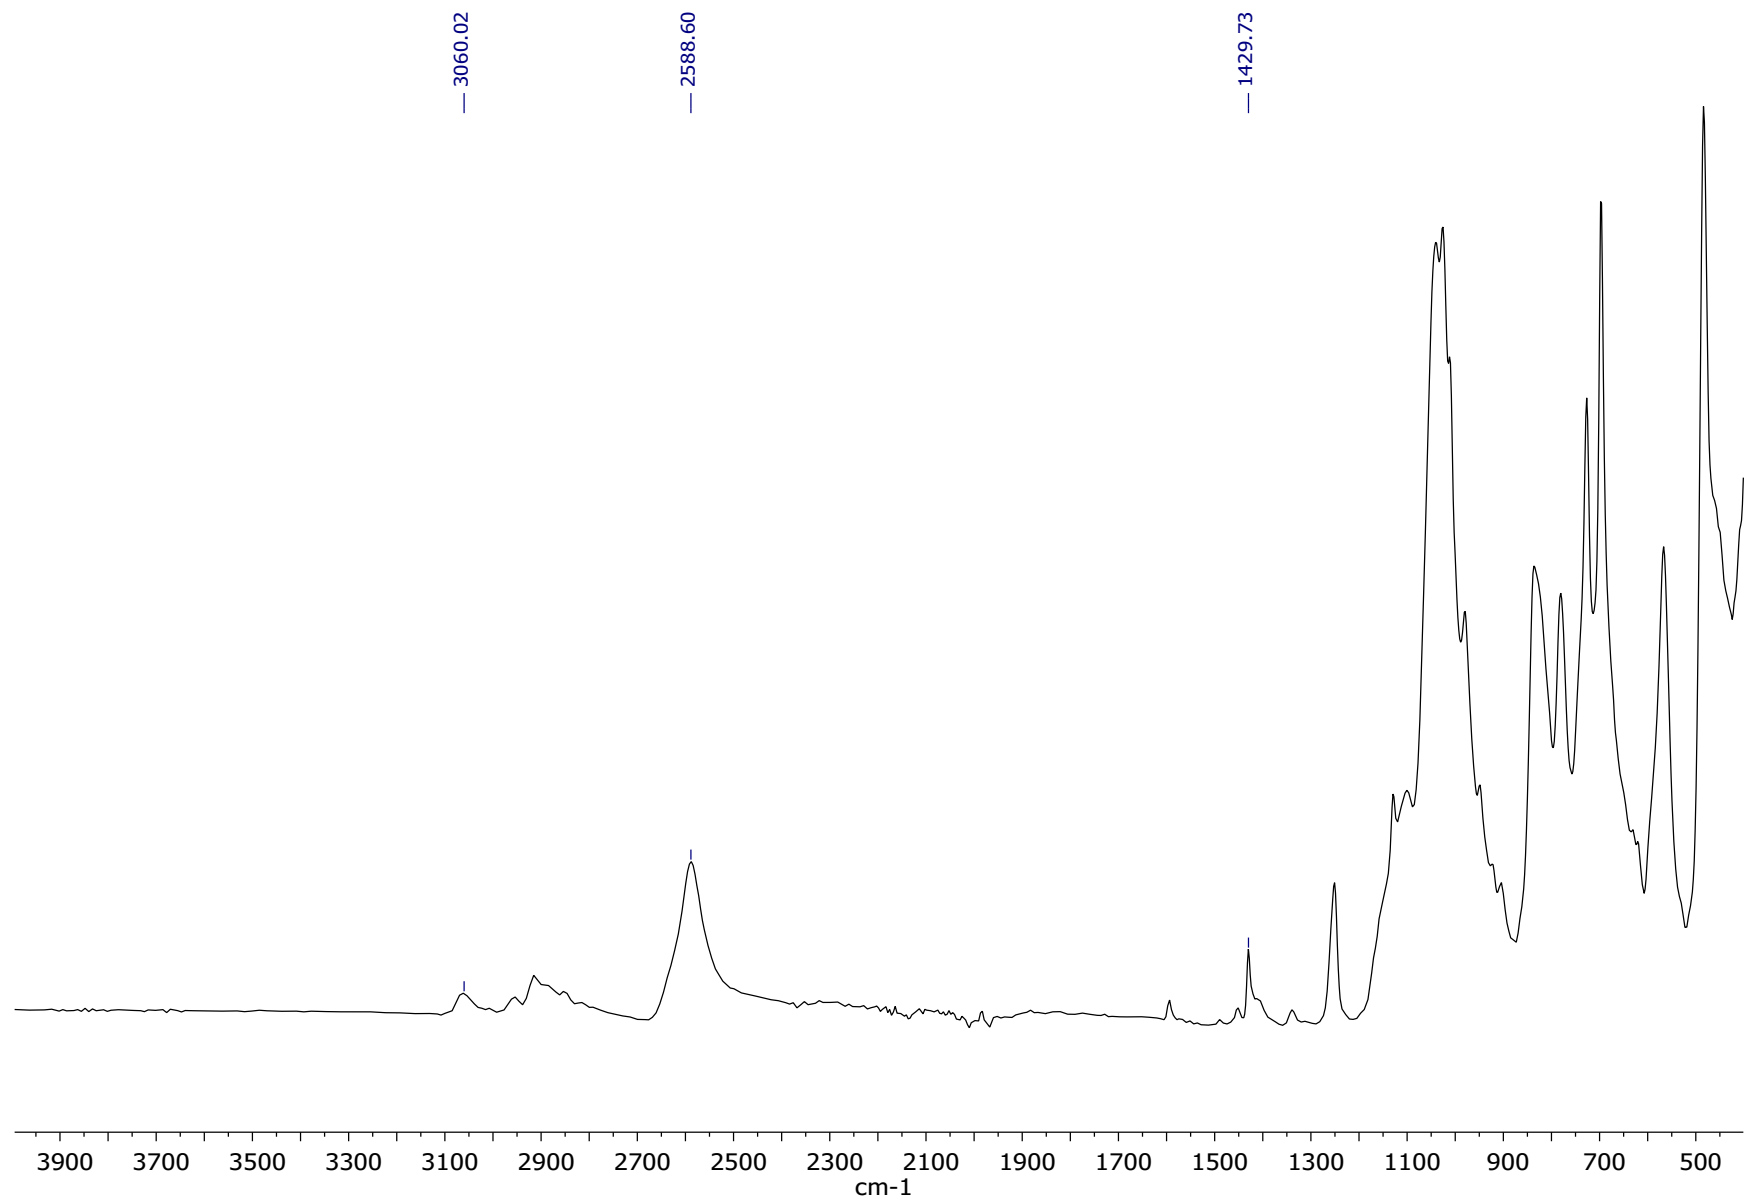

Fig S29. IR (cm<sup>-1</sup>) spectrum of *cis*-octa[phenyl(1(3-(9-*m*-carboranyl)propyl)dimethylsiloxy)]cyclooctasiloxane (cycle 8)

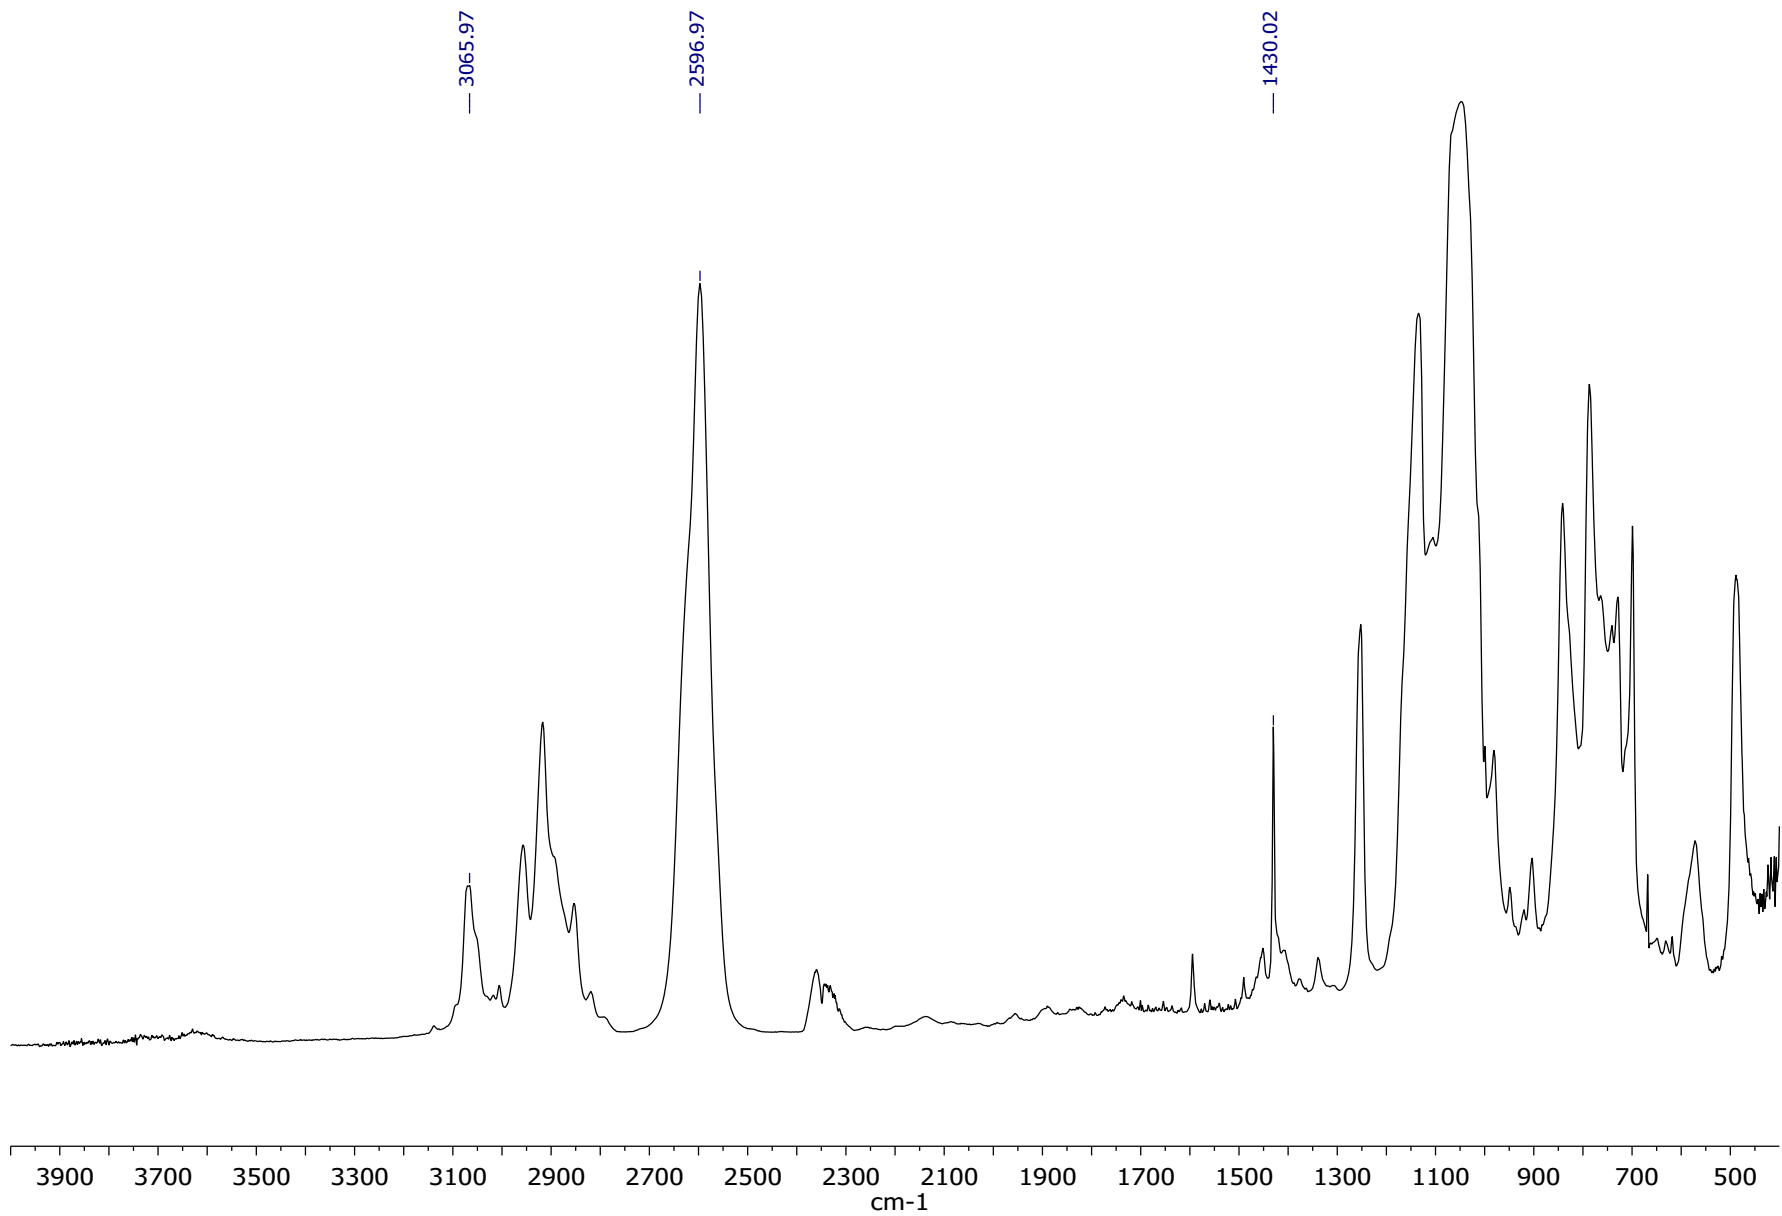

Fig S30. IR (cm<sup>-1</sup>) spectrum of tris-*cis*-tris-*trans*-dodeca[phenyl(1(3-(9-*m*-carboranyl)propyl)dimethylsiloxy)]cyclododecasiloxane (cycle 12)



GPC data

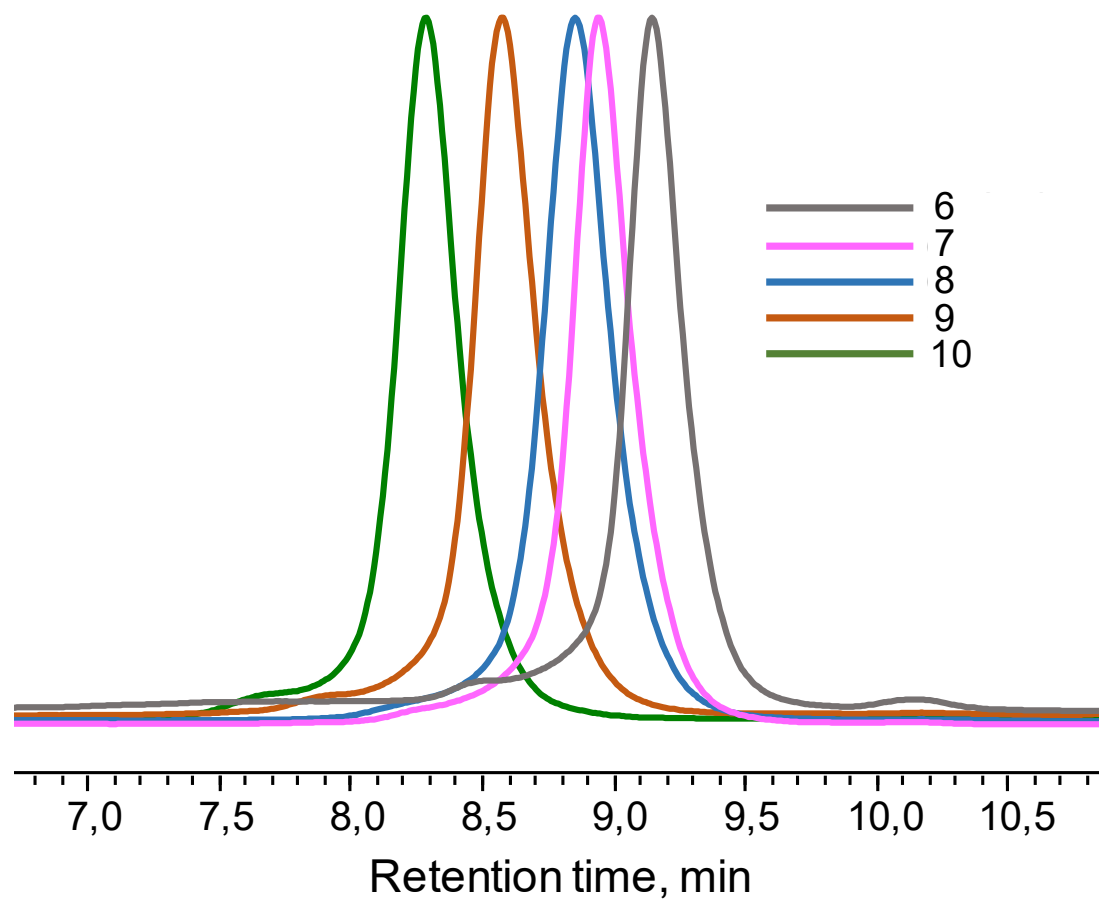

Fig S31. GPC curves of carboranophenylcyclsiloxanes

TGA data

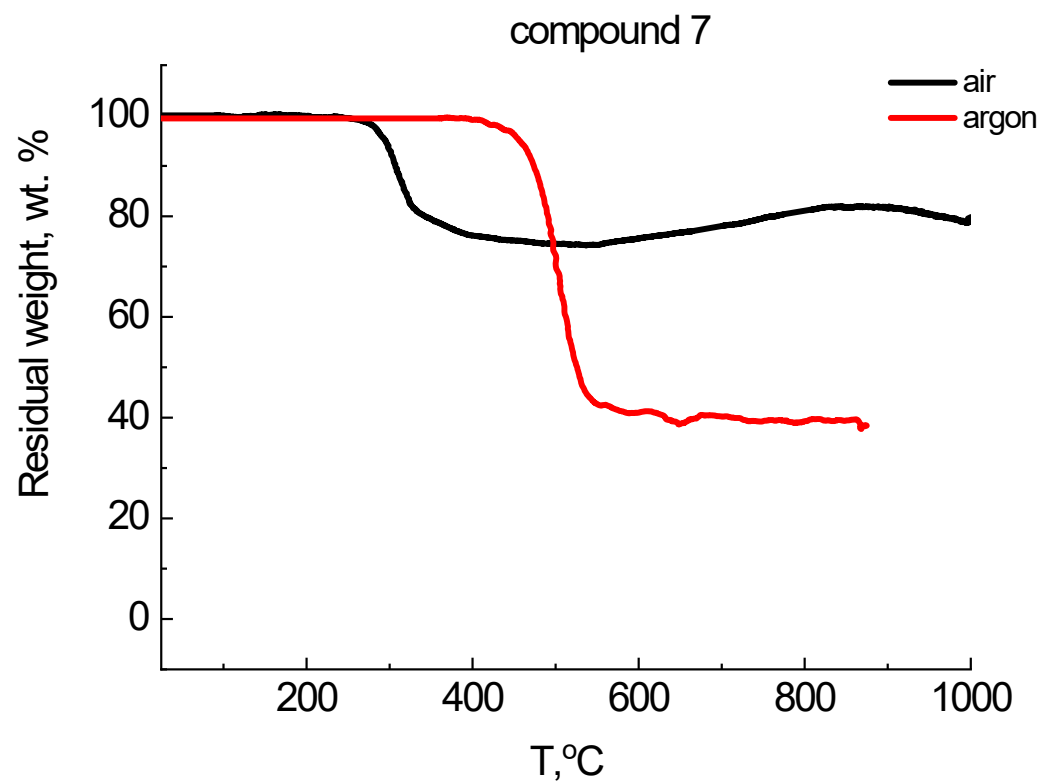

Fig S32. TGA curves of *cis*-penta[phenyl(1(3-(9-*m*-carboranyl)propyl)dimethylsiloxy)]cyclopentasiloxane in air (black curve) and in argon (red curve) at a heating rate of 10 °C/min

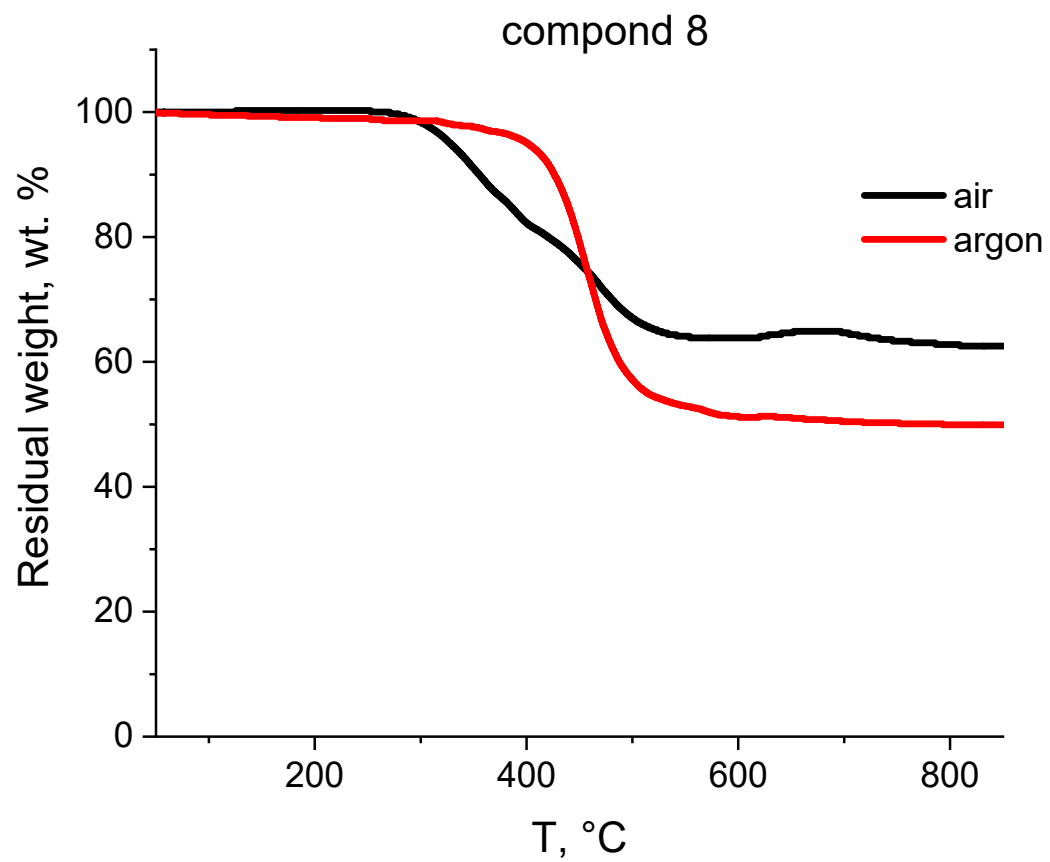

Fig S33. TGA curves of *cis*-hexa[phenyl(1(3-(9-*m*-carboranyl)propyl)dimethylsiloxy)]cyclohexasiloxane in air (black curve) and in argon (red curve) at a heating rate of 10 °C/min

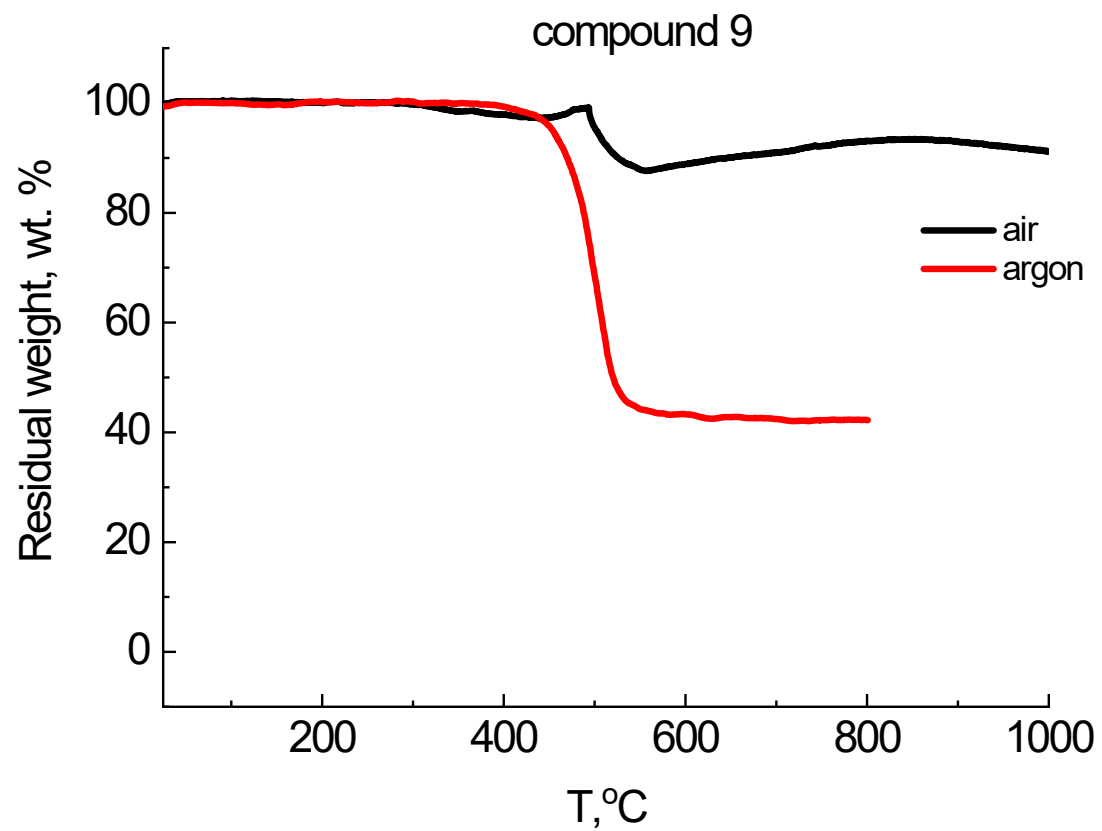

Fig S34. TGA curves of *cis*-octa[phenyl(1(3-(9-*m*-carboranyl)propyl)dimethylsiloxy)]cyclooctasiloxane in air (black curve) and in argon (red curve) at a heating rate of 10 °C/min

## Mass spectra

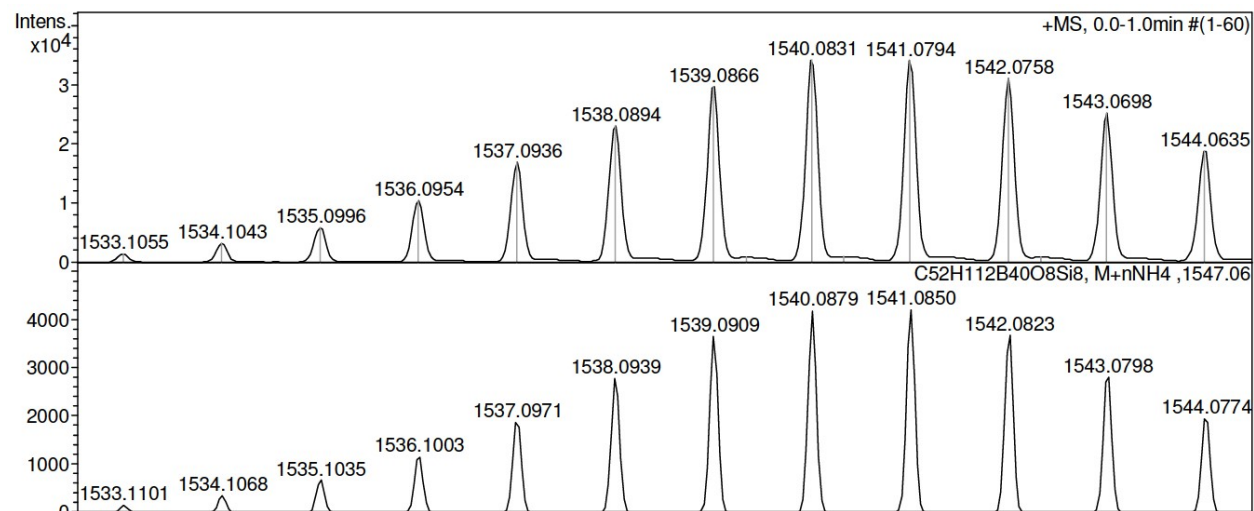

Fig S35. Mass spectrum of *cis*-tetra[phenyl(1(3-(9-*m*-carboranyl)propyl)dimethylsiloxy)]cyclotetrasiloxane (cycle 4)

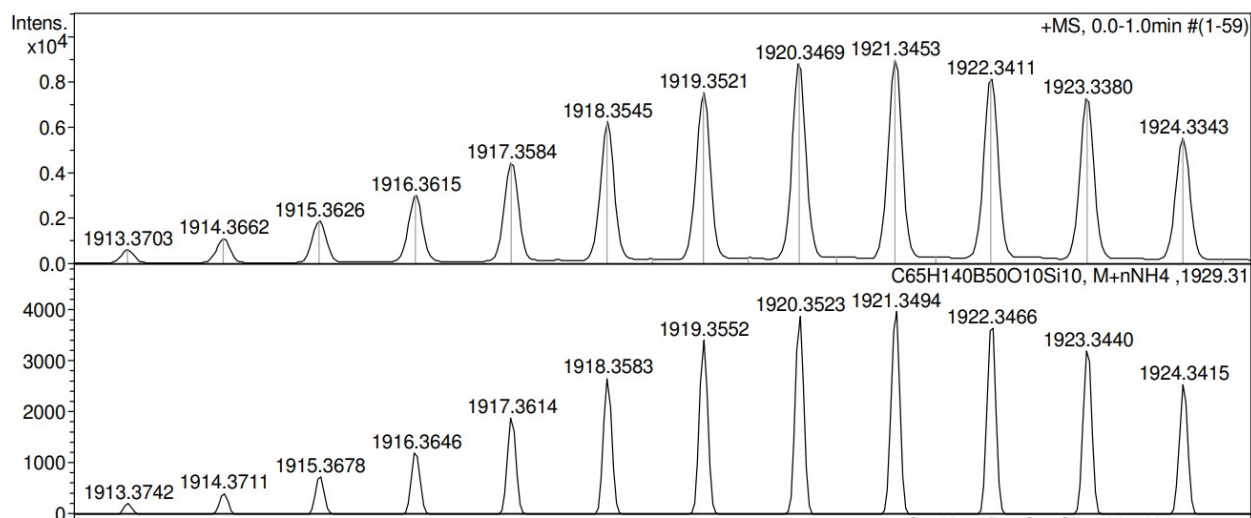

Fig S36. Mass spectrum of *cis*-penta[phenyl(1(3-(9-*m*-carboranyl)propyl)dimethylsiloxy)]cyclopentasiloxane (cycle 5)

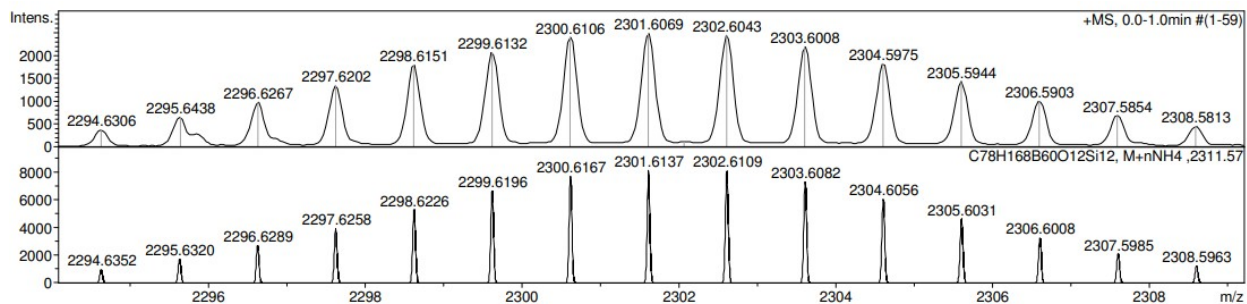

Fig S37. Mass spectrum of *cis*-hexa[phenyl(1(3-(9-*m*-carboranyl)propyl)dimethylsiloxy)]cyclohexasiloxane (cycle 6)

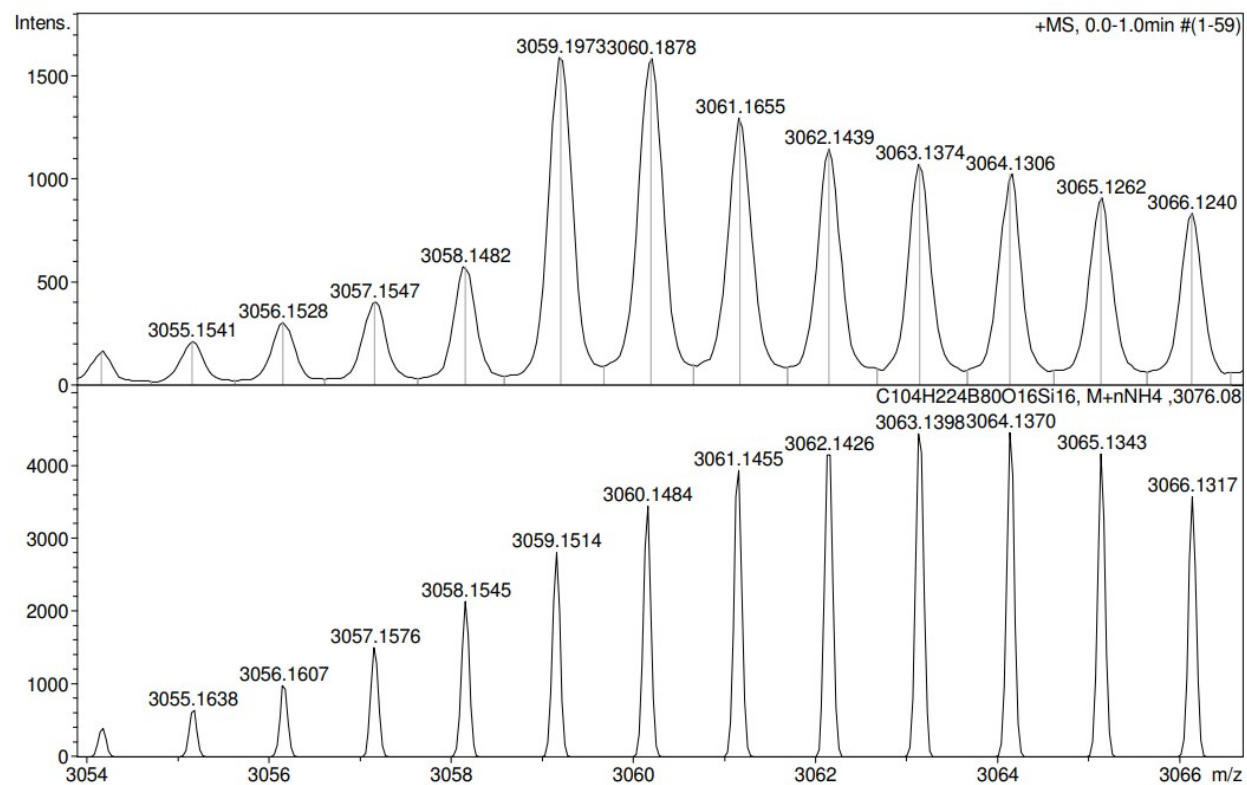

Fig S38. Mass spectrum of *cis*-octa[phenyl(1(3-(9-*m*-carboranyl)propyl)dimethylsiloxy)]cyclooctasiloxane (cycle 8)
